# Supplementary material for: Ion-bearing stairs: alkali metal complexes of 1,2-diaza-4-phospholides
Source: Royal Society of Chemistry journal article supplement (doi:10.1039/d1dt03601g), 2021-12-20
Supplement: d1dt03601g1.pdf [file d1dt03601g1.pdf]

## Electronic Supplementary Information

### **Ion-bearing stairs: alkali metal complexes of 1,2-diaza-4-phospholide**

Minggang Zhao,<sup>a</sup> Tingting Xue,<sup>a</sup> Ruru He,<sup>a</sup> Jianping Ma<sup>b</sup> and Wenjun Zheng<sup>a,c\*</sup>

<sup>a</sup>*Key Laboratory of Magnetic Molecules & Magnetic Information Materials Ministry of Education, The School of Chemical and Material Science, Shanxi Normal University, Taiyuan, Shanxi 030035, China*

<sup>b</sup>*College of Chemistry, Chemical Engineering and Materials Science, Shandong Normal University, Jinan, Shandong 250014, China.*

<sup>c</sup>*Wenbo Chemical Co., Ltd. Guonian Road 65, Shanghai, 200433, China*

Email: wjzheng@sxnu.edu.cn, wjzheng\_sxnu@qq.com

## Table of the Content

|             |                                                                                                 |    |
|-------------|-------------------------------------------------------------------------------------------------|----|
| Figure S1.  | <sup>31</sup> P NMR spectrum of <b>3</b> in DMSO- <i>d</i> <sub>6</sub> .....                   | 3  |
| Figure S2.  | <sup>1</sup> H NMR spectrum of <b>3</b> in DMSO- <i>d</i> <sub>6</sub> .....                    | 3  |
| Figure S3.  | <sup>31</sup> P NMR spectra of <b>4</b> in DMSO- <i>d</i> <sub>6</sub> .....                    | 4  |
| Figure S4.  | <sup>1</sup> H NMR spectra of <b>4</b> in DMSO- <i>d</i> <sub>6</sub> .....                     | 4  |
| Figure S5.  | <sup>13</sup> C{ <sup>1</sup> H} NMR spectra of <b>4</b> in DMSO- <i>d</i> <sub>6</sub> .....   | 5  |
| Figure S6.  | <sup>31</sup> P NMR spectra of <b>5</b> in DMSO- <i>d</i> <sub>6</sub> .....                    | 5  |
| Figure S7.  | <sup>1</sup> H NMR spectra of <b>5</b> in DMSO- <i>d</i> <sub>6</sub> .....                     | 6  |
| Figure S8.  | <sup>13</sup> C{ <sup>1</sup> H} NMR spectra of <b>5</b> in DMSO- <i>d</i> <sub>6</sub> .....   | 6  |
| Figure S9.  | <sup>31</sup> P NMR spectra of <b>6</b> in DMSO- <i>d</i> <sub>6</sub> .....                    | 7  |
| Figure S10. | <sup>1</sup> H NMR spectra of <b>6</b> in DMSO- <i>d</i> <sub>6</sub> .....                     | 7  |
| Figure S11. | <sup>13</sup> C{ <sup>1</sup> H} NMR spectra of <b>6</b> in DMSO- <i>d</i> <sub>6</sub> .....   | 8  |
| Figure S12. | <sup>31</sup> P NMR spectra of <b>7</b> in DMSO- <i>d</i> <sub>6</sub> .....                    | 8  |
| Figure S13. | <sup>1</sup> H NMR spectra of <b>7</b> in DMSO- <i>d</i> <sub>6</sub> .....                     | 9  |
| Figure S14. | <sup>13</sup> C{ <sup>1</sup> H} NMR spectra of <b>7</b> in DMSO- <i>d</i> <sub>6</sub> .....   | 9  |
| Figure S15. | <sup>31</sup> P NMR spectra of <b>8</b> in DMSO- <i>d</i> <sub>6</sub> .....                    | 10 |
| Figure S16. | <sup>1</sup> H NMR spectra of <b>8</b> in DMSO- <i>d</i> <sub>6</sub> .....                     | 10 |
| Figure S17. | <sup>13</sup> C{ <sup>1</sup> H} NMR spectra of <b>8</b> in DMSO- <i>d</i> <sub>6</sub> .....   | 11 |
| Figure S18. | <sup>31</sup> P NMR spectrum of <b>9</b> in DMSO- <i>d</i> <sub>6</sub> .....                   | 11 |
| Figure S19. | <sup>1</sup> H NMR spectrum of <b>9</b> in DMSO- <i>d</i> <sub>6</sub> .....                    | 12 |
| Figure S20. | <sup>13</sup> C{ <sup>1</sup> H} NMR spectrum of <b>9</b> in DMSO- <i>d</i> <sub>6</sub> .....  | 12 |
| Figure S21. | <sup>31</sup> P NMR spectrum of <b>10</b> in DMSO- <i>d</i> <sub>6</sub> .....                  | 13 |
| Figure S22. | <sup>1</sup> H NMR spectrum of <b>10</b> in DMSO- <i>d</i> <sub>6</sub> .....                   | 13 |
| Figure S23. | <sup>13</sup> C{ <sup>1</sup> H} NMR spectrum of <b>10</b> in DMSO- <i>d</i> <sub>6</sub> ..... | 14 |
| Figure S24. | <sup>31</sup> P NMR spectrum of <b>11</b> in DMSO- <i>d</i> <sub>6</sub> .....                  | 14 |
| Figure S25. | <sup>1</sup> H NMR spectrum of <b>11</b> in DMSO- <i>d</i> <sub>6</sub> .....                   | 15 |
| Figure S26. | <sup>13</sup> C{ <sup>1</sup> H} NMR spectrum of <b>11</b> in DMSO- <i>d</i> <sub>6</sub> ..... | 15 |
| Figure S27. | Comparison of selected bond lengths(Å) for complex <b>8</b> , <b>10</b> and <b>11</b> .....     | 16 |
| Figure S28. | The distance of C1...C10 (7.113 Å ) in complex <b>8</b> .....                                   | 16 |
| Table S1.   | Crystal structural analysis data for <b>4</b> .....                                             | 17 |
| Table S2.   | Crystal structural analysis data for <b>5</b> .....                                             | 21 |
| Table S3.   | Crystal structural analysis data for <b>6</b> .....                                             | 30 |
| Table S4.   | Crystal structural analysis data for <b>7</b> .....                                             | 42 |
| Table S5.   | Crystal structural analysis data for <b>8</b> .....                                             | 48 |
| Table S6.   | Crystal structural analysis data for <b>9</b> .....                                             | 54 |
| Table S7.   | Crystal structural analysis data for <b>10</b> .....                                            | 58 |
| Table S8.   | Crystal structural analysis data for <b>11</b> .....                                            | 78 |



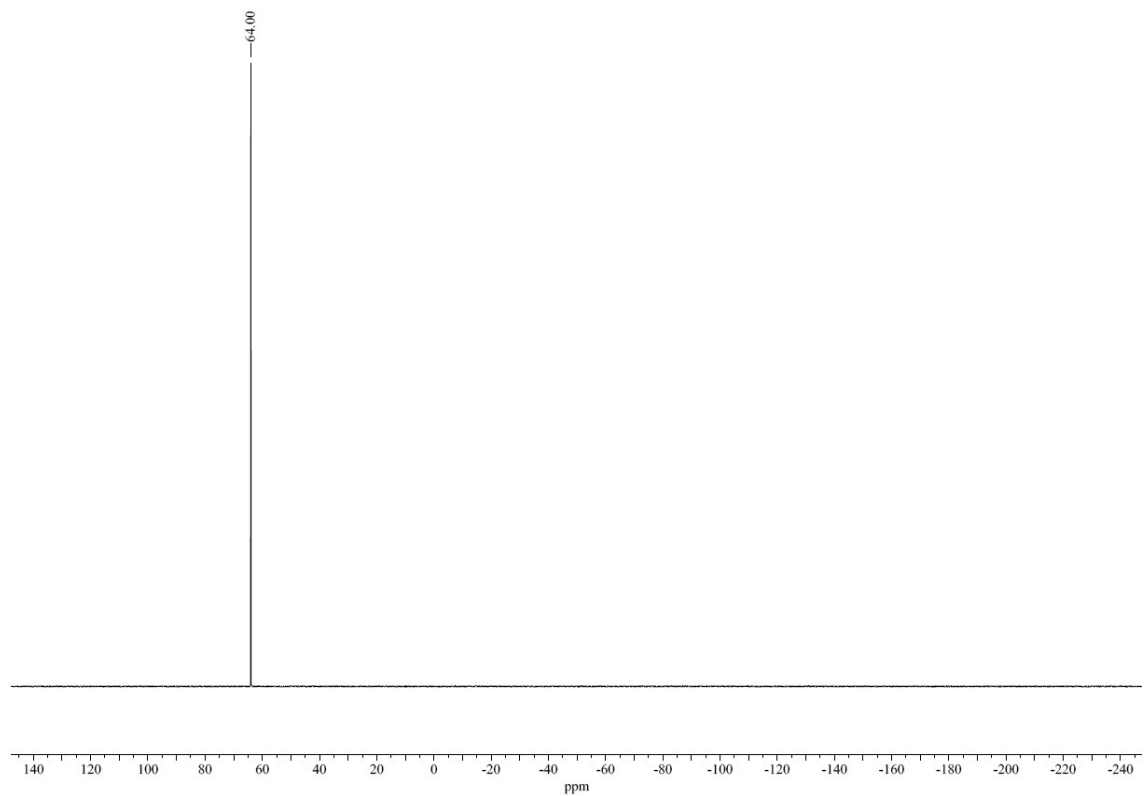

**Figure S1.**  $^{31}\text{P}\{^1\text{H}\}$  NMR spectrum of **3** in  $\text{DMSO-}d_6$

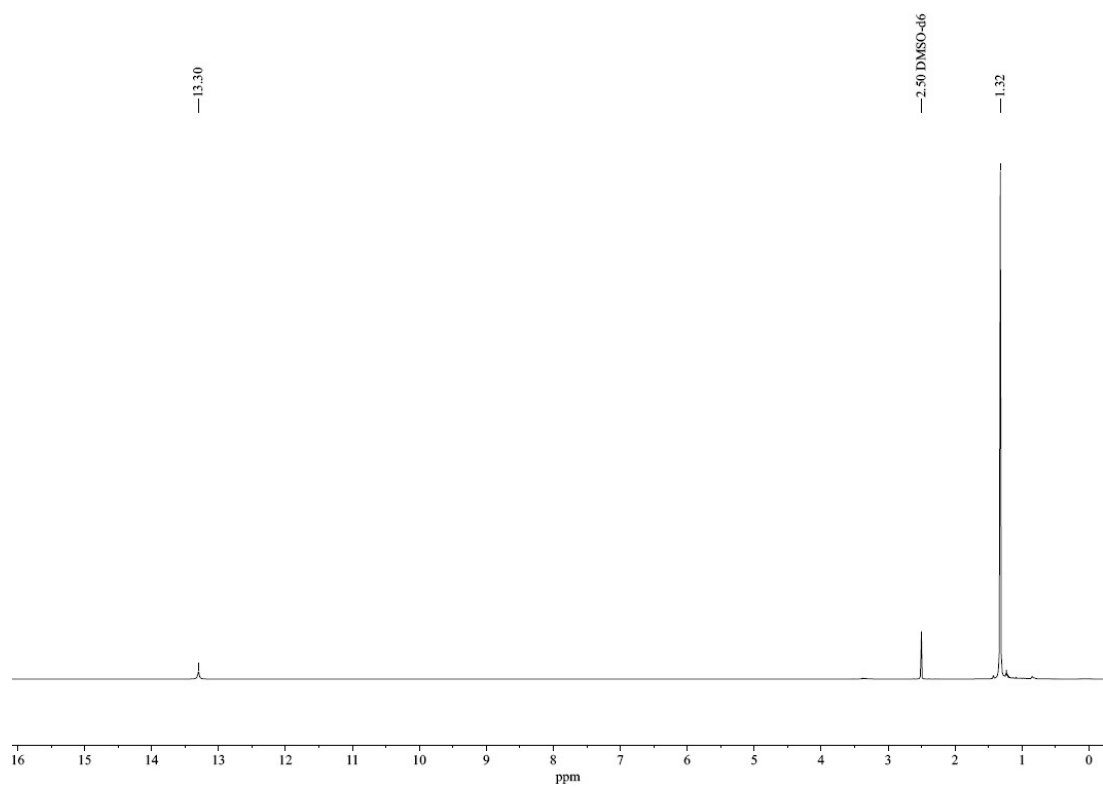

**Figure S2.**  $^1\text{H}$  NMR spectrum of **3** in  $\text{DMSO-}d_6$

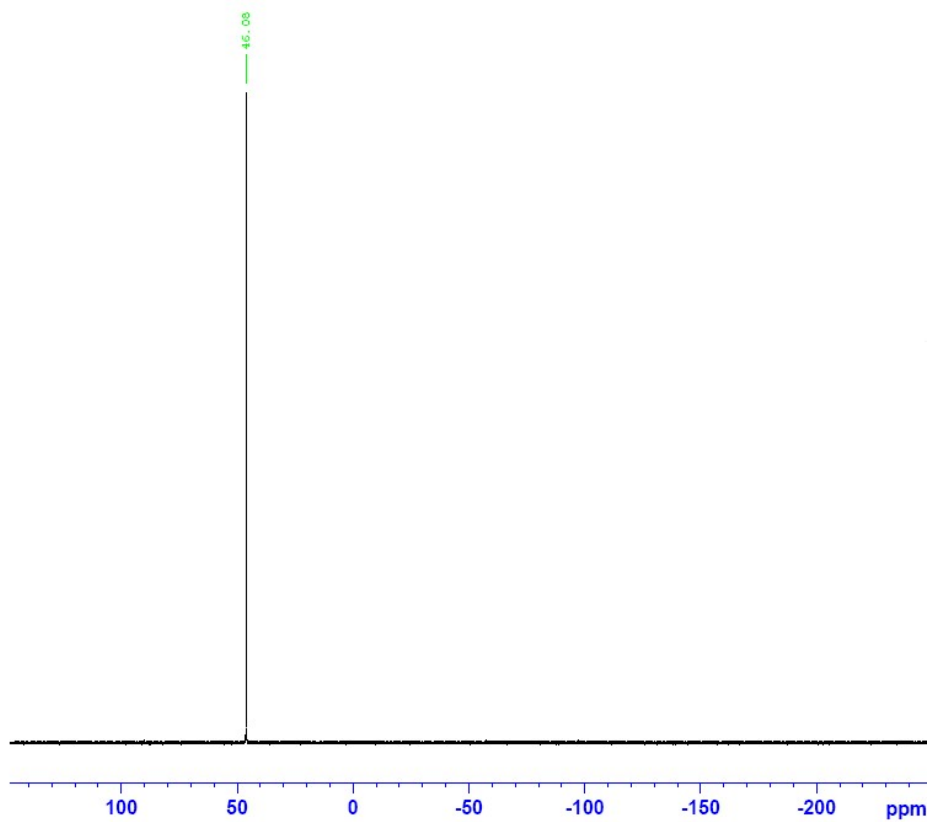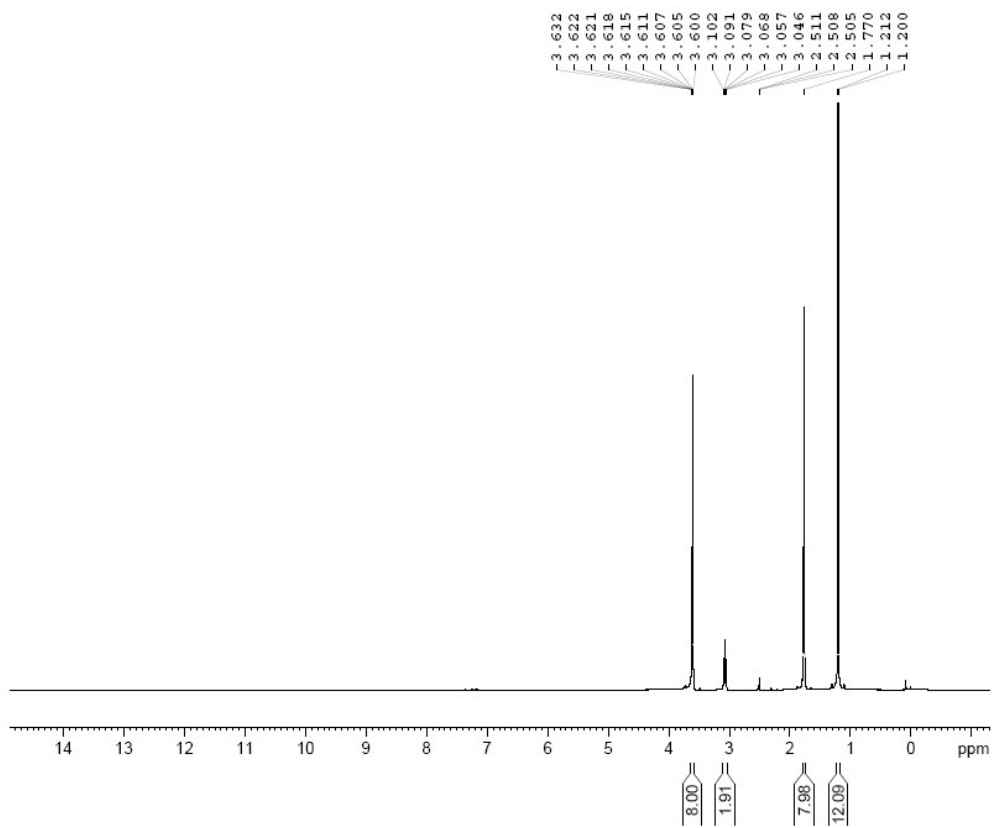

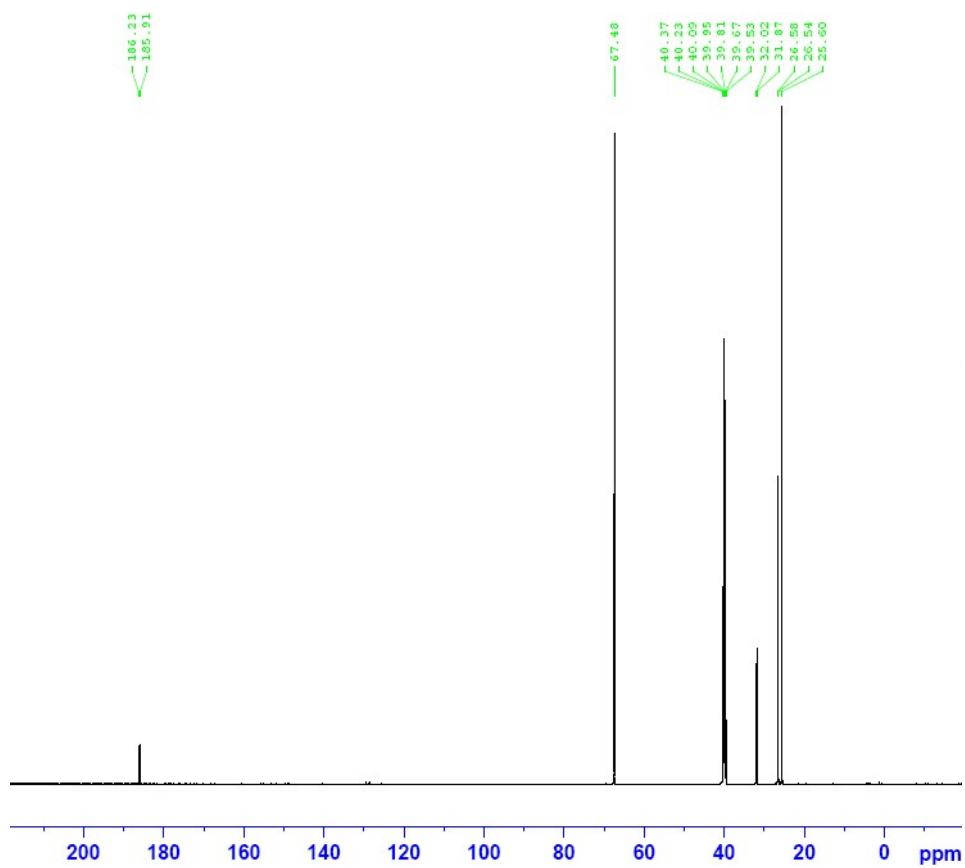

Figure S5.  $^{13}\text{C}$  NMR spectra of **4** in  $\text{DMSO-}d_6$

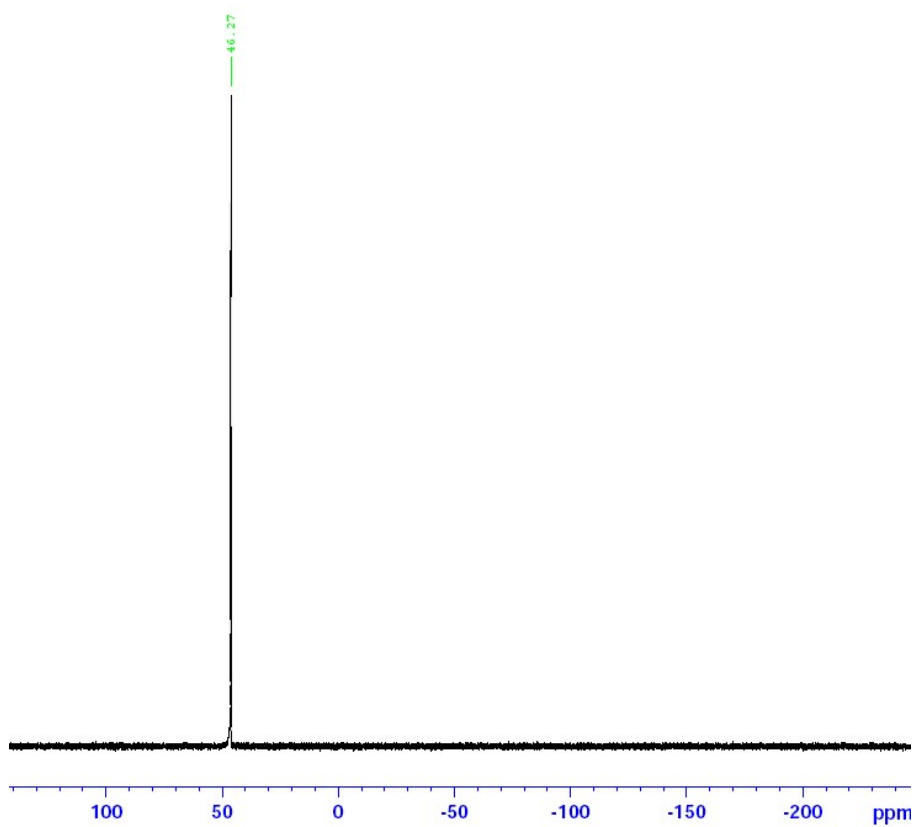

Figure S6.  $^{31}\text{P}$  NMR spectra of **5** in  $\text{DMSO-}d_6$

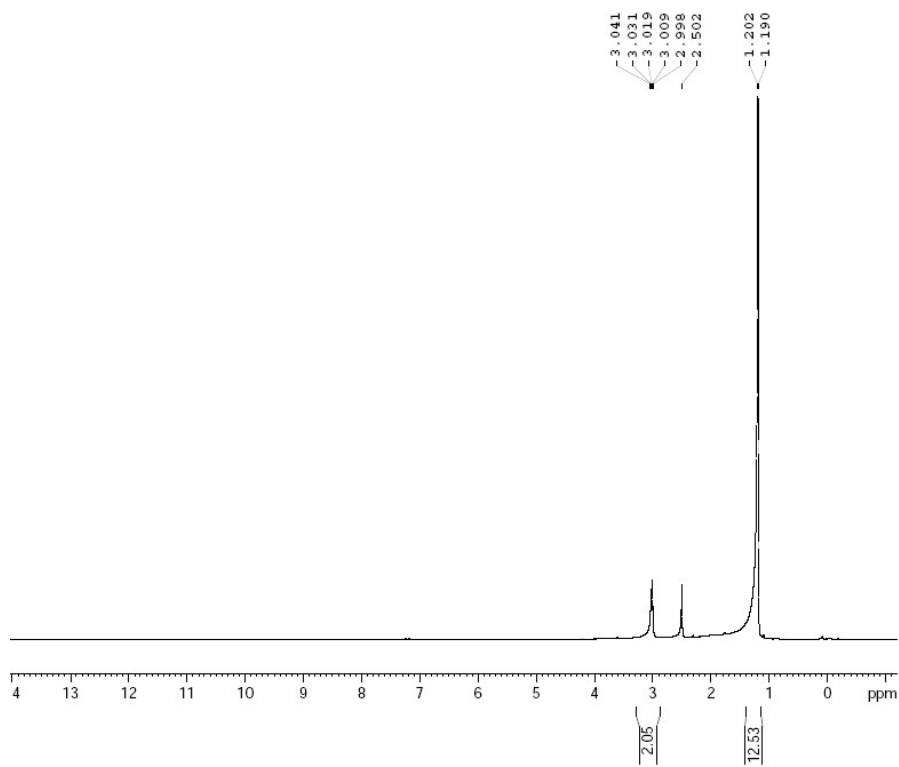

Figure S7.  $^1\text{H}$  NMR spectra of **5** in  $\text{DMSO-}d_6$

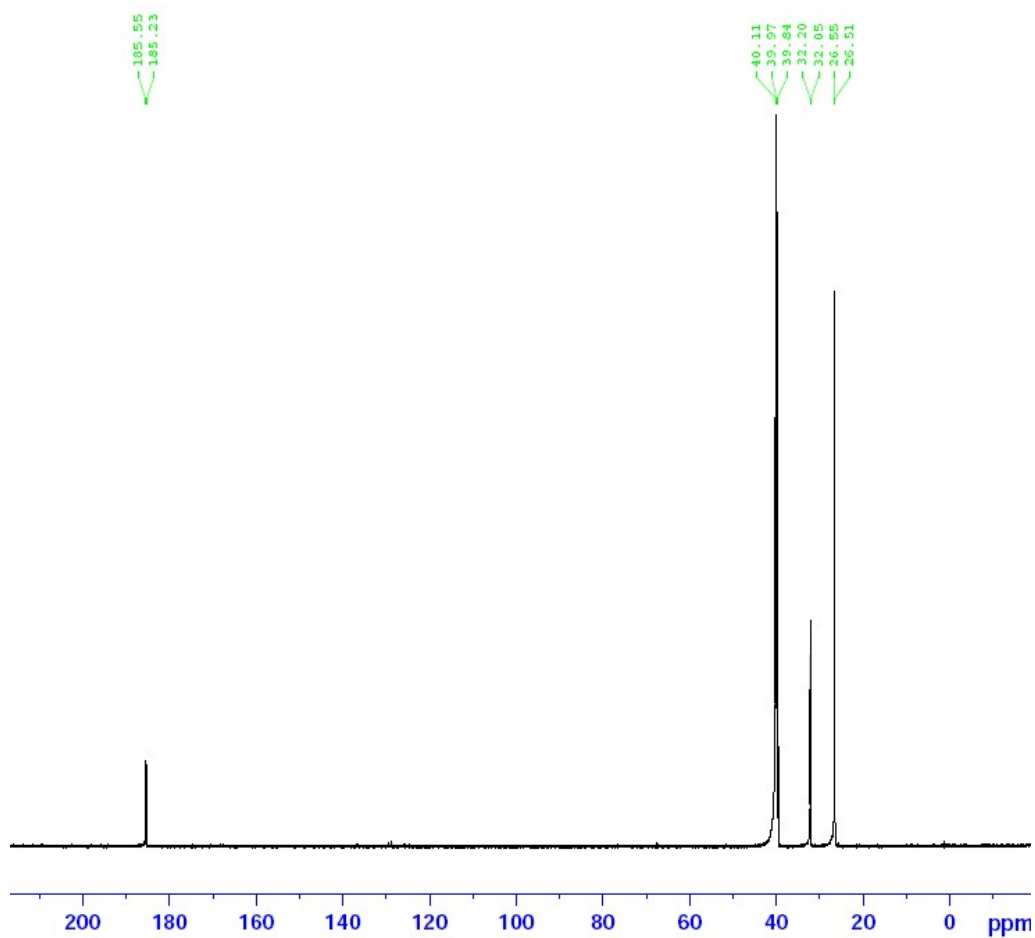

Figure S8.  $^{13}\text{C}$  NMR spectra of **5** in  $\text{DMSO-}d_6$

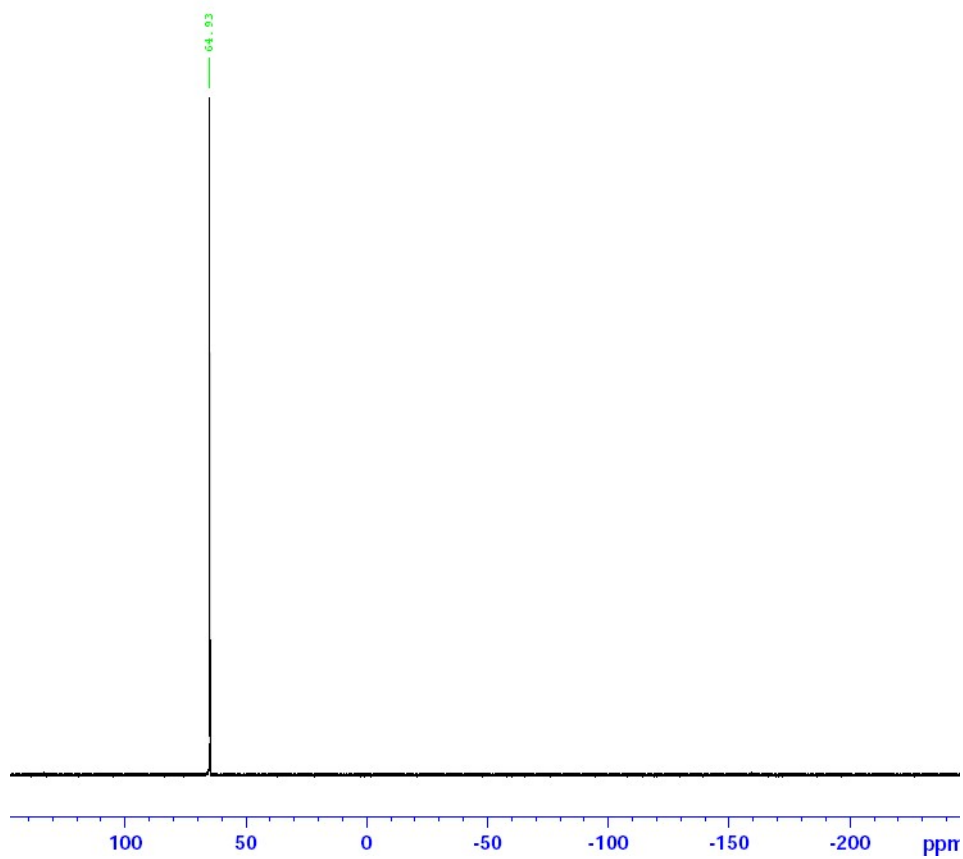

Figure S9. <sup>31</sup>P NMR spectra of **6** in DMSO-d<sub>6</sub>

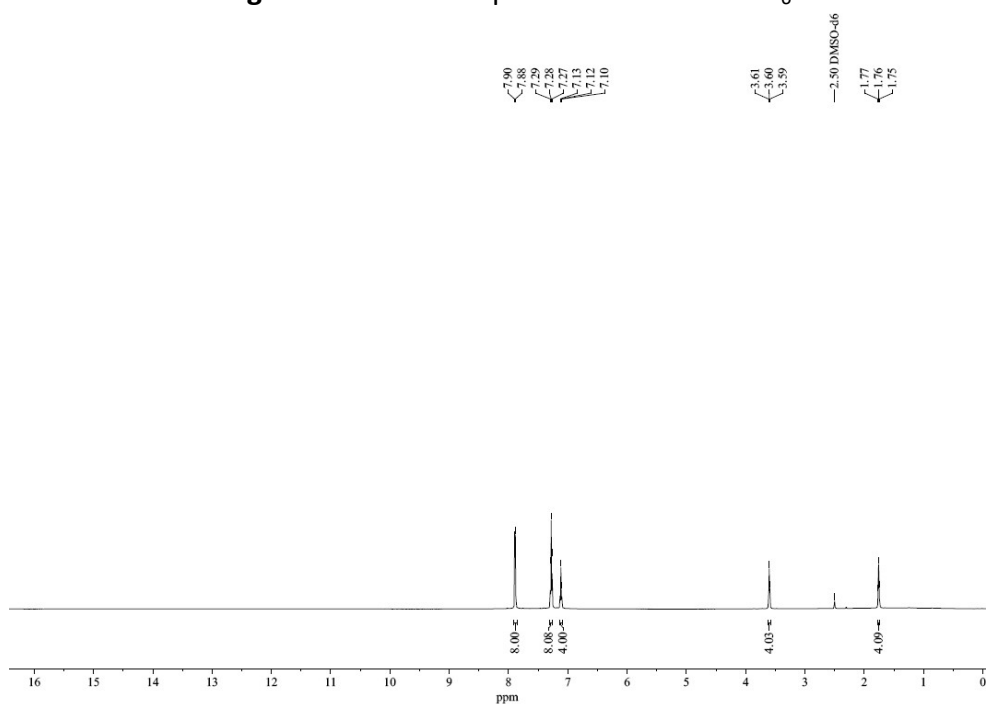

Figure S10. <sup>1</sup>H NMR spectra of **6** in DMSO-d<sub>6</sub>



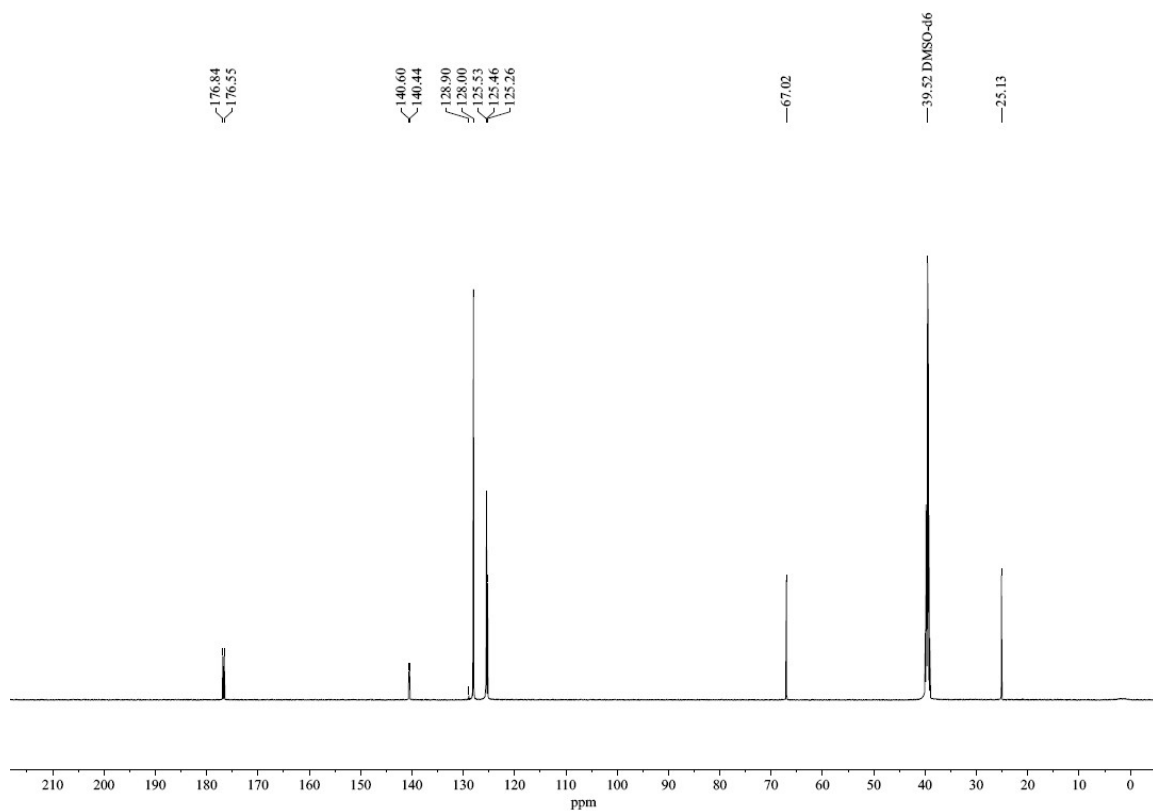

Figure S11.  $^{13}\text{C}$  NMR spectra of **6** in  $\text{DMSO-}d_6$

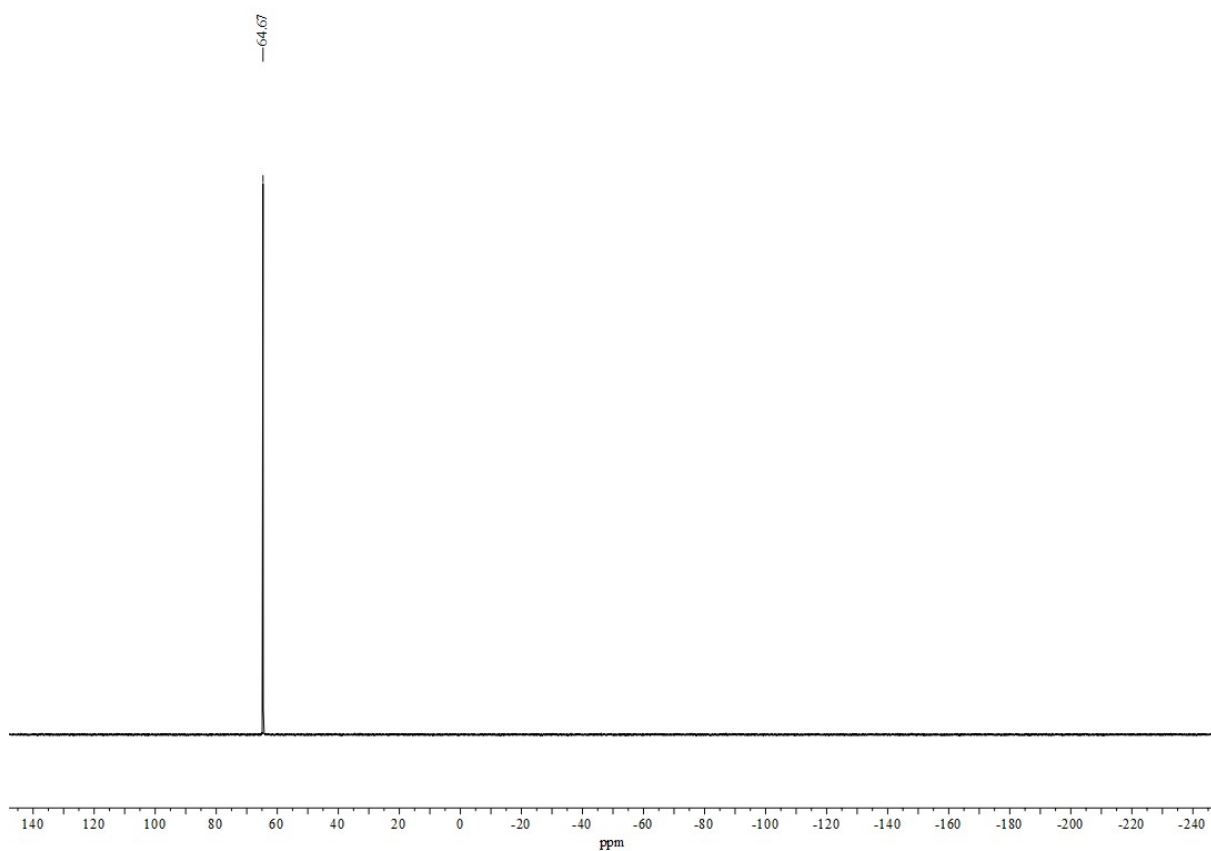

Figure S12.  $^{31}\text{P}$  NMR spectra of **7** in  $\text{DMSO-}d_6$

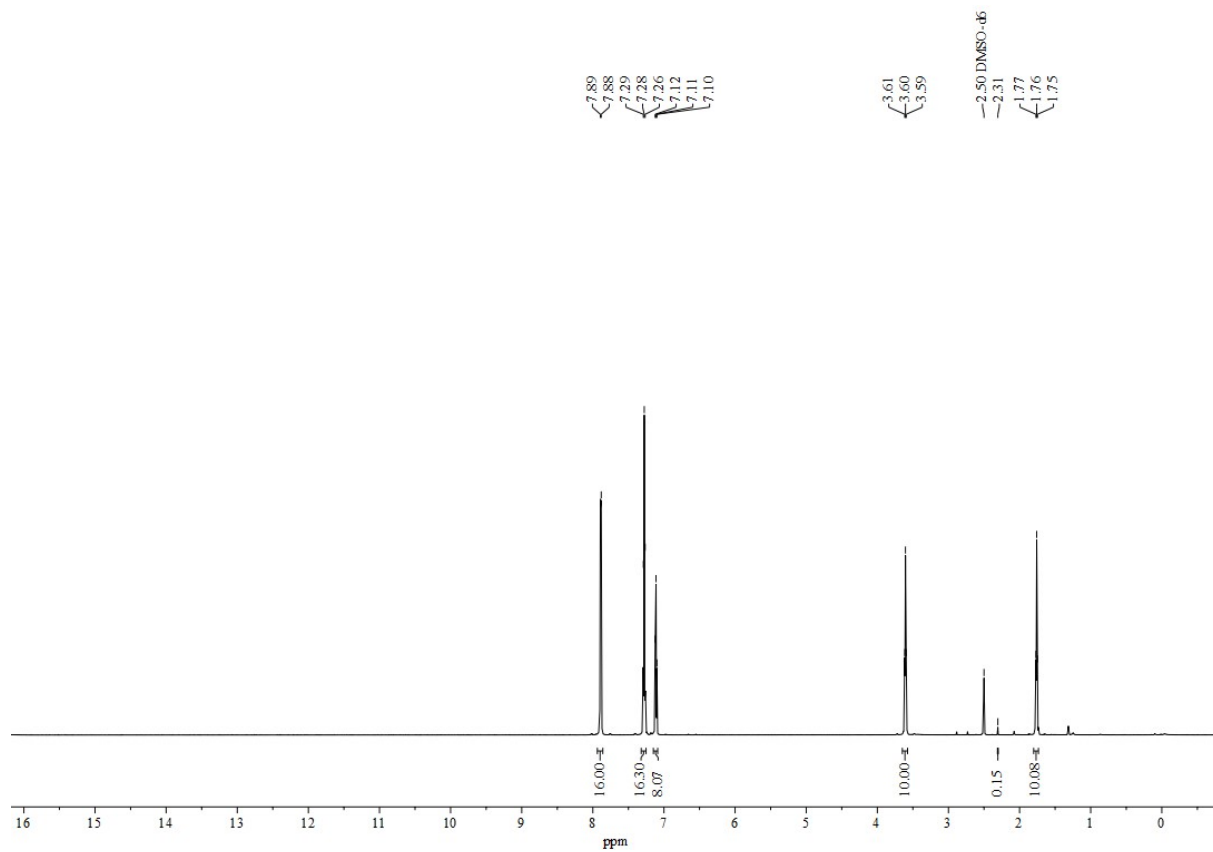

Figure S13.  $^1\text{H}$  NMR spectra of **7** in  $\text{DMSO-}d_6$

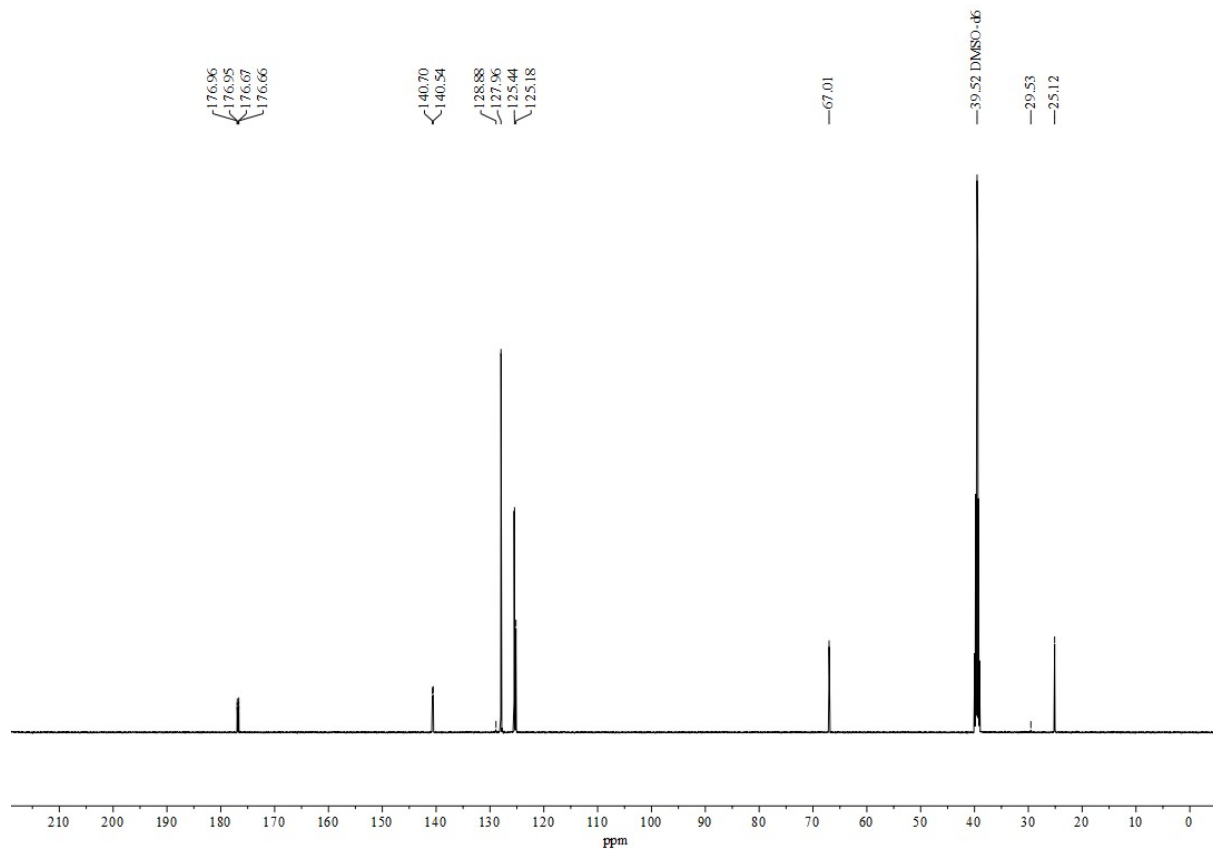

Figure S14.  $^{13}\text{C}$  NMR spectra of **7** in  $\text{DMSO-}d_6$

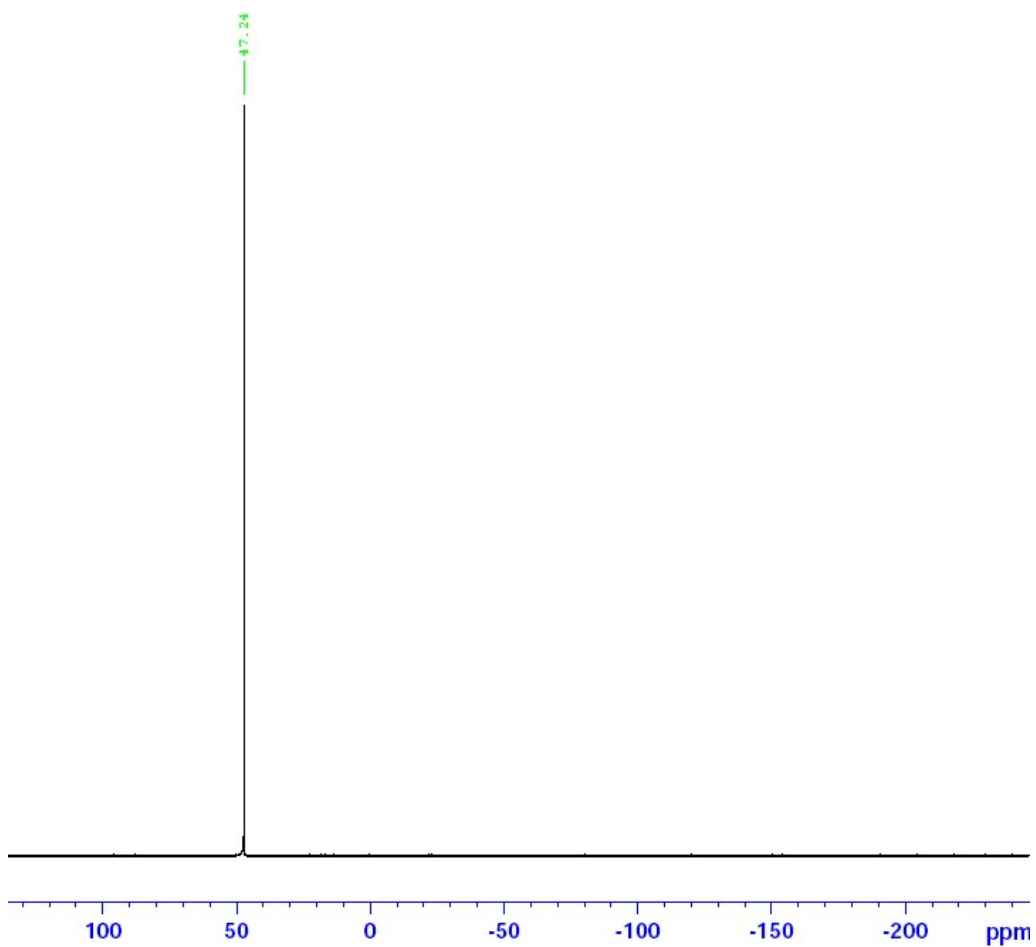

Figure S15.  $^{31}\text{P}$  NMR spectra of **8** in  $\text{DMSO-}d_6$

— 2.506  
— 1.290

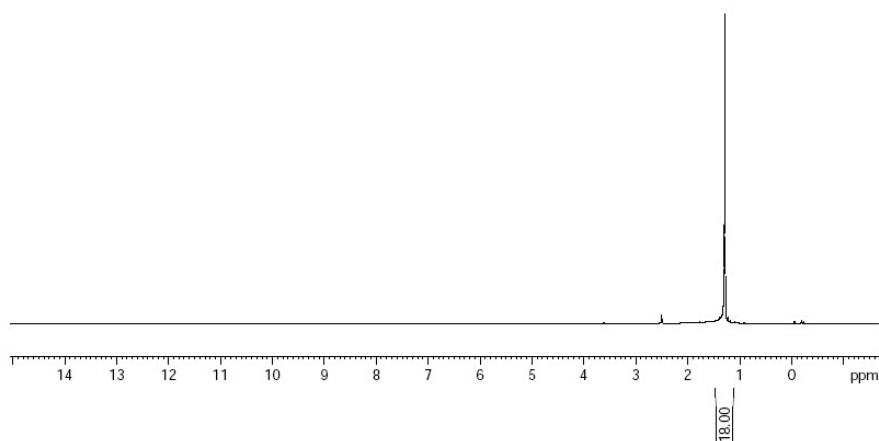

Figure S16.  $^1\text{H}$  NMR spectra of **8** in  $\text{DMSO-}d_6$

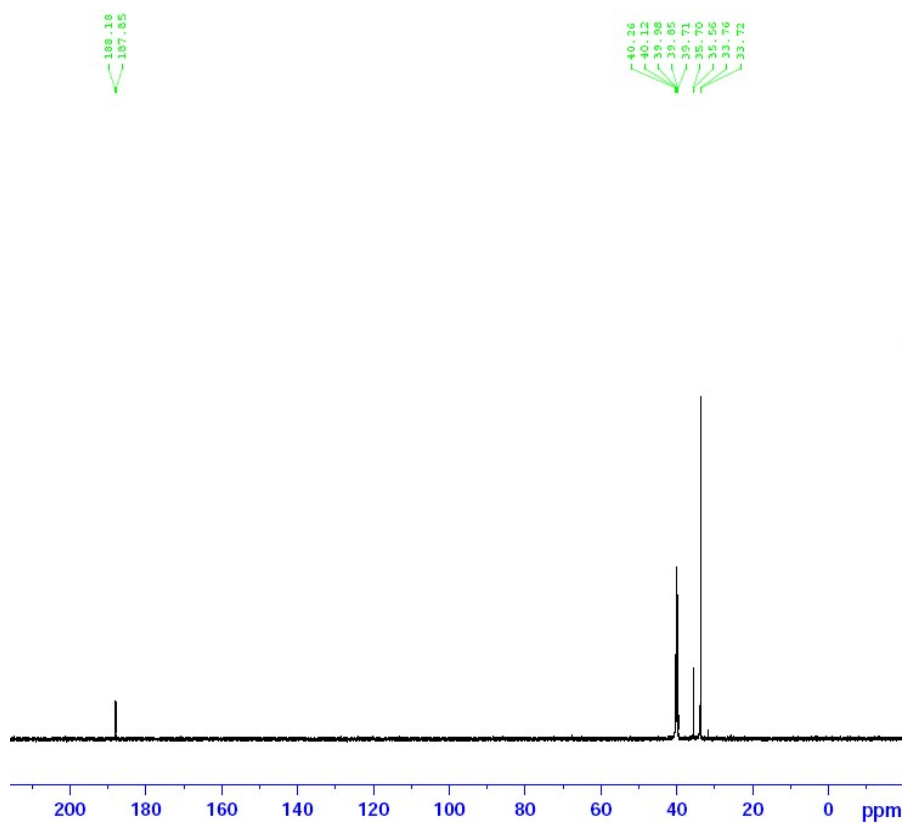

Figure S17.  $^{13}\text{C}$  NMR spectra of **8** in  $\text{DMSO-}d_6$

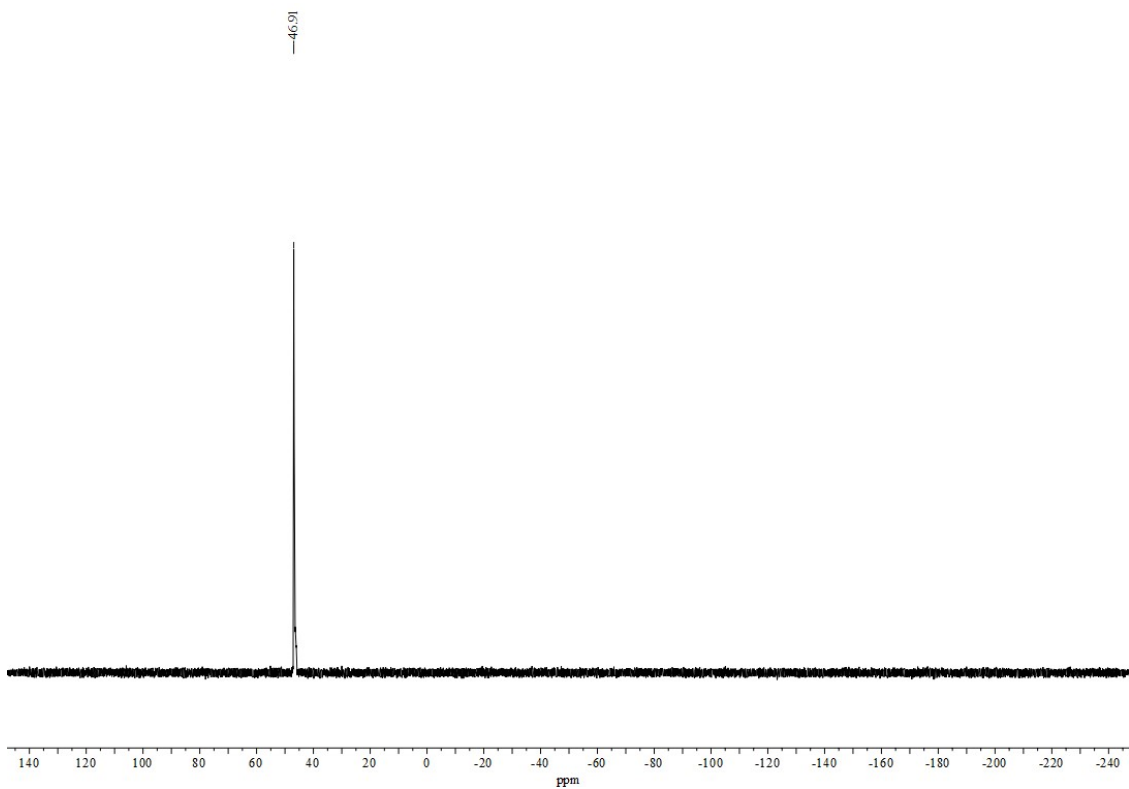

Figure S18.  $^{31}\text{P}$  NMR spectra of **9** in  $\text{DMSO-}d_6$

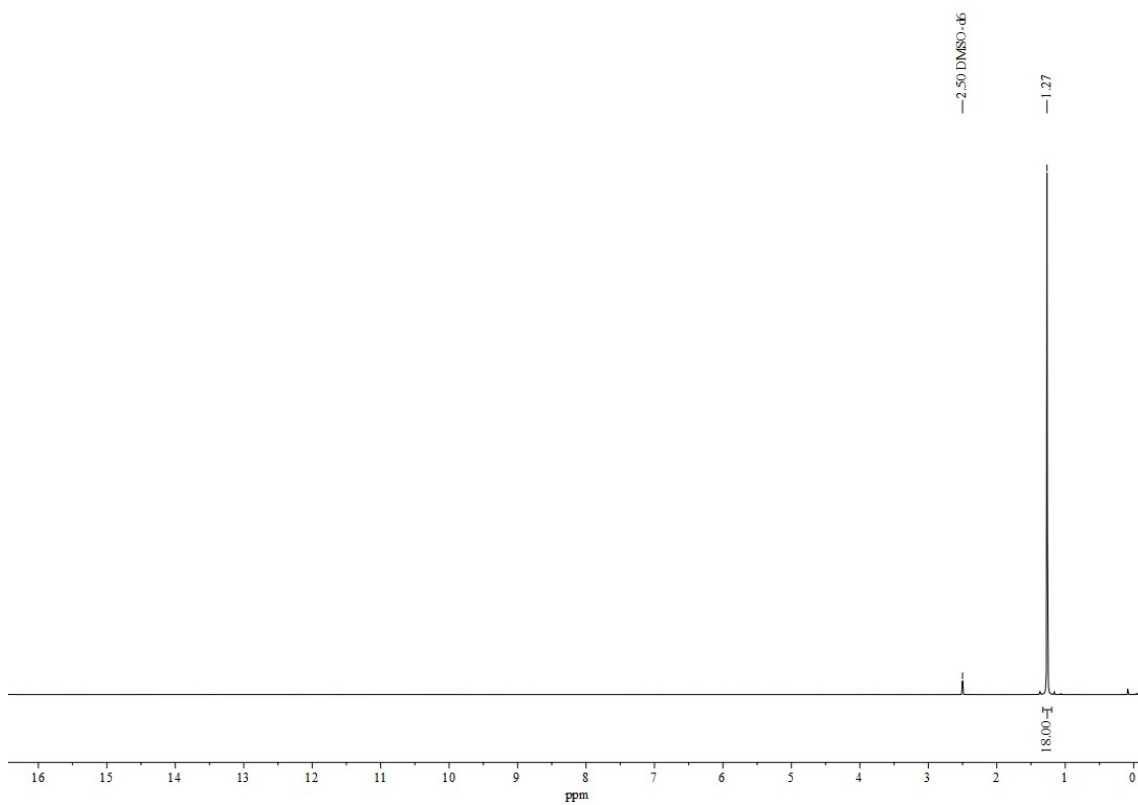

Figure S19. <sup>1</sup>H NMR spectra of **9** in DMSO-*d*<sub>6</sub>

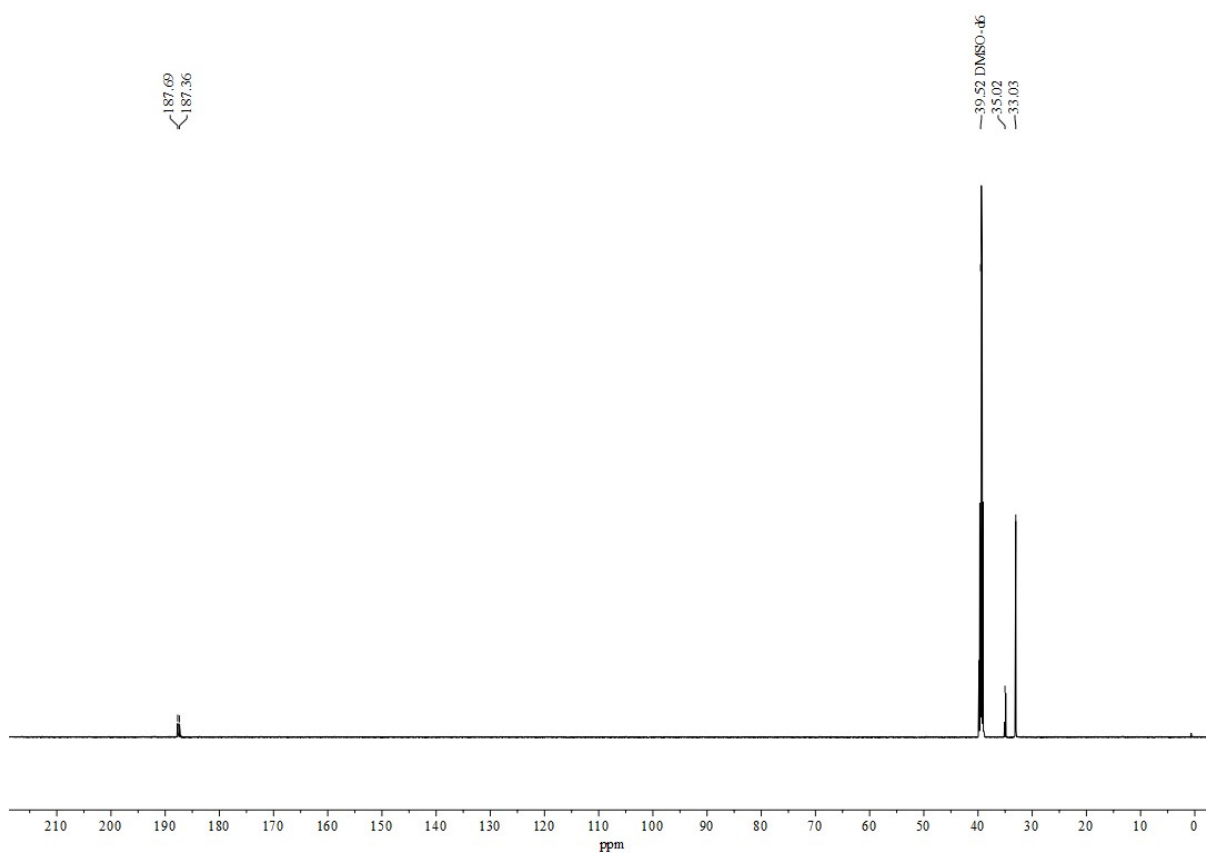

Figure S20. <sup>13</sup>C NMR spectra of **9** in DMSO-*d*<sub>6</sub>

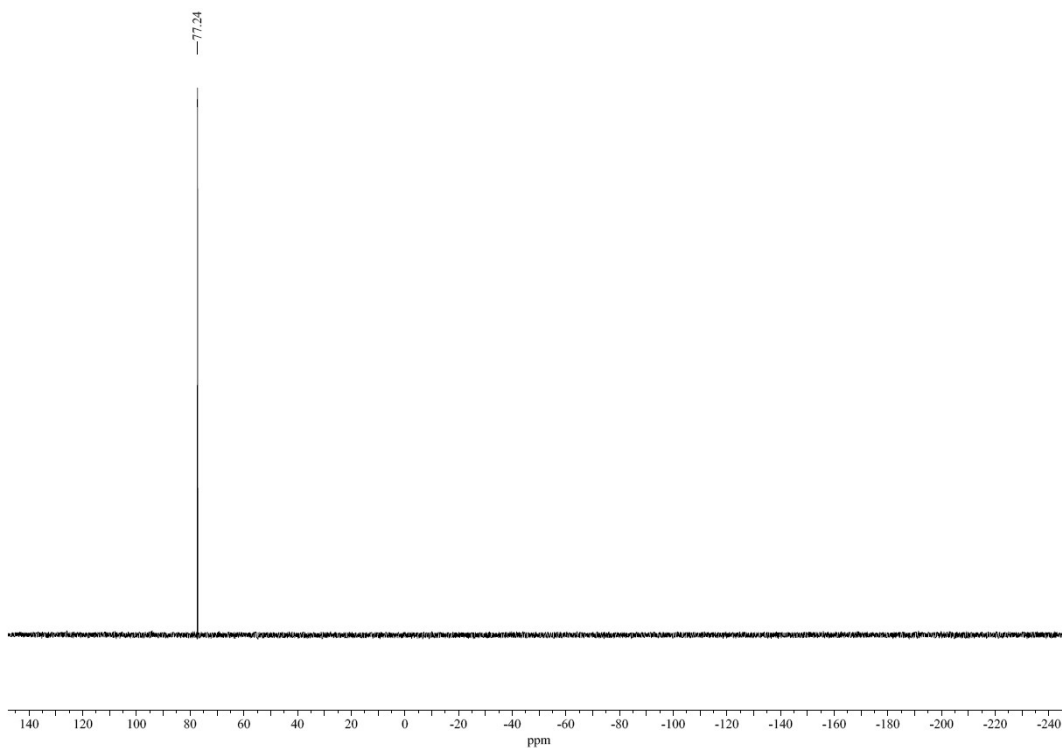

**Figure S21.**  $^{31}\text{P}\{^1\text{H}\}$  NMR spectrum of **10** in  $\text{DMSO-}d_6$

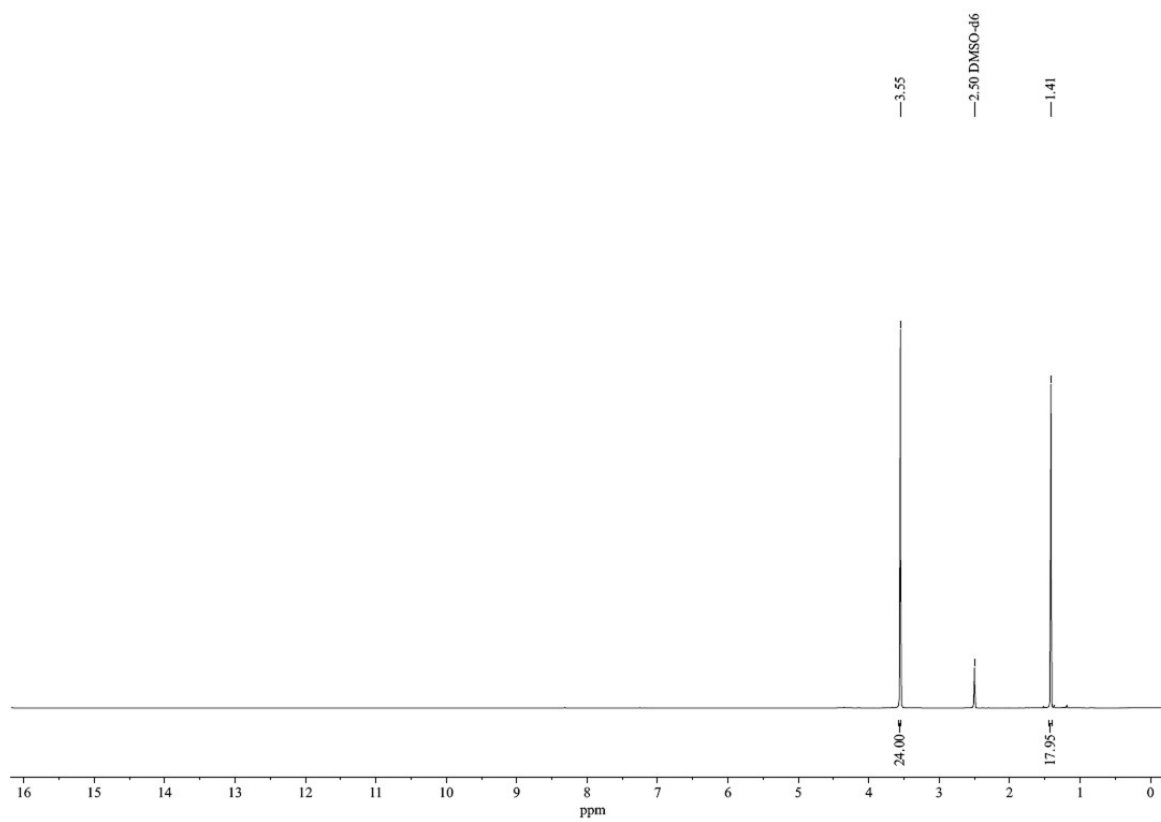

**Figure S22.**  $^1\text{H}$  NMR spectrum of **10** in  $\text{DMSO-}d_6$

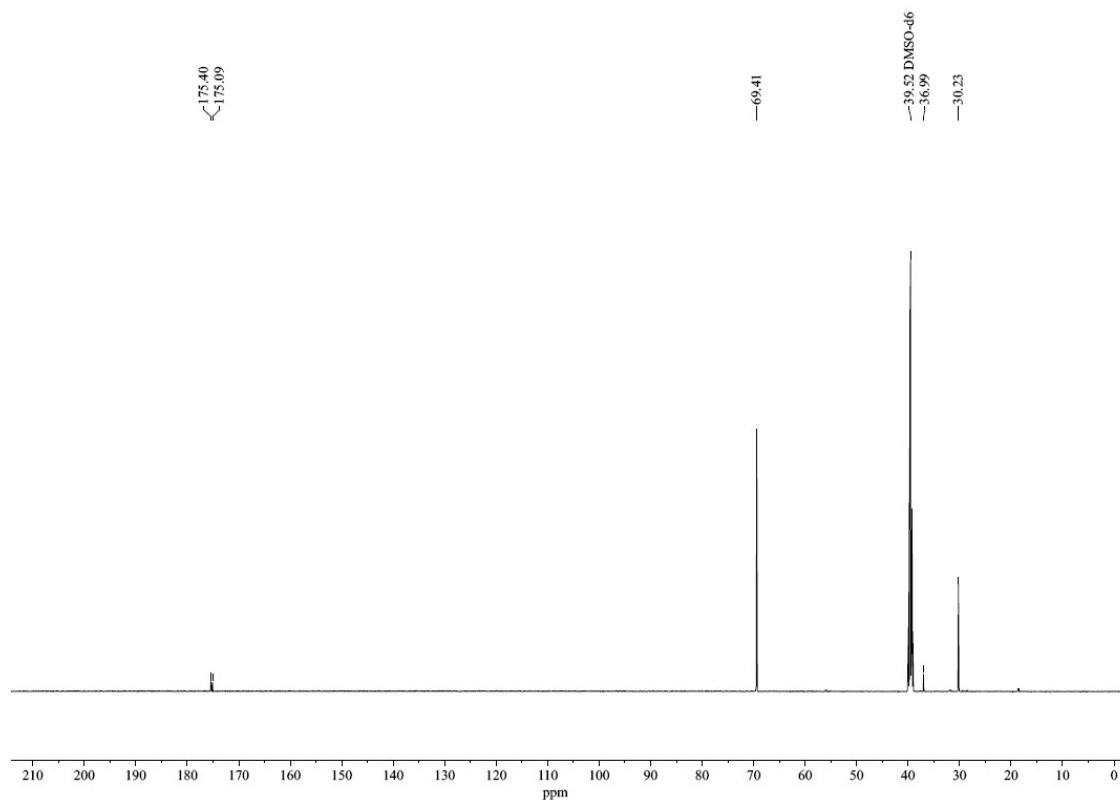

Figure S23.  $^{13}\text{C}\{^1\text{H}\}$  NMR spectrum of **10** in  $\text{DMSO-}d_6$

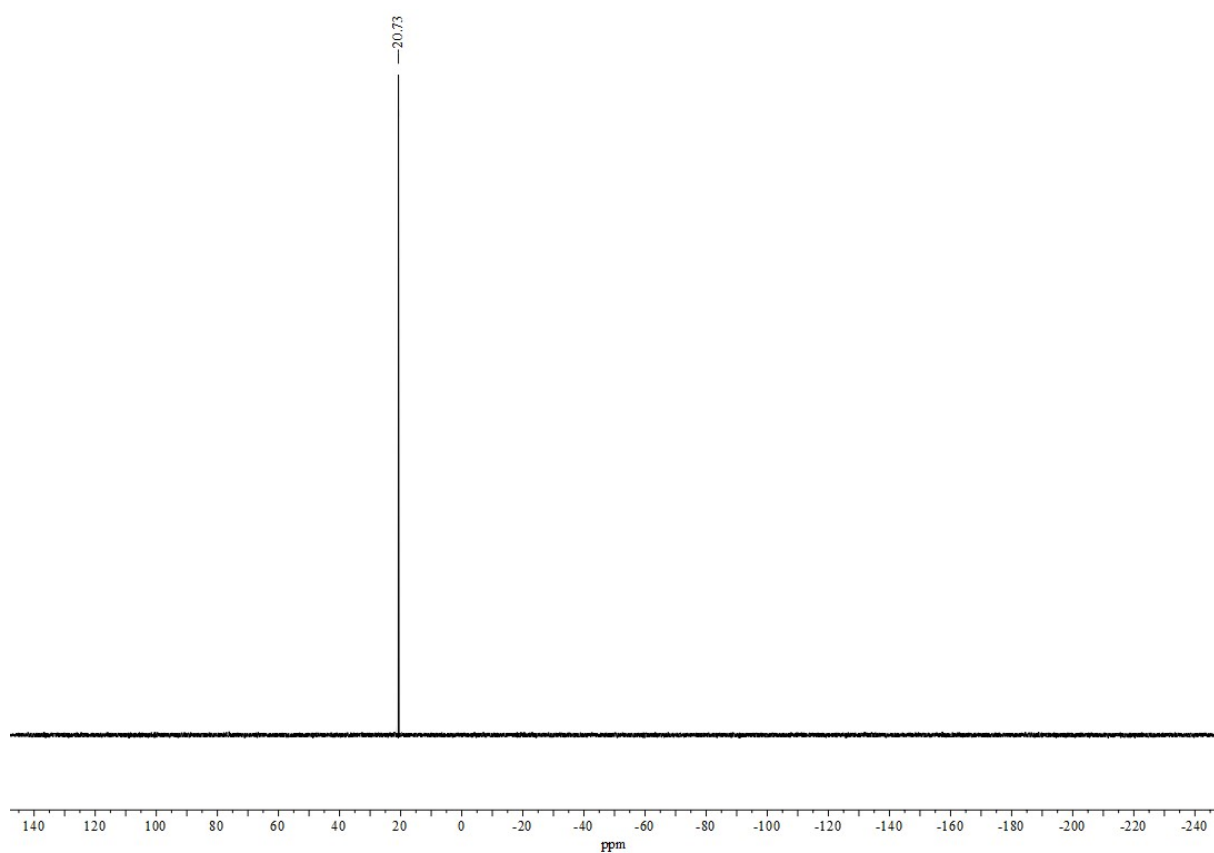

Figure S24.  $^{31}\text{P}$  NMR spectra of **11** in  $\text{DMSO-}d_6$

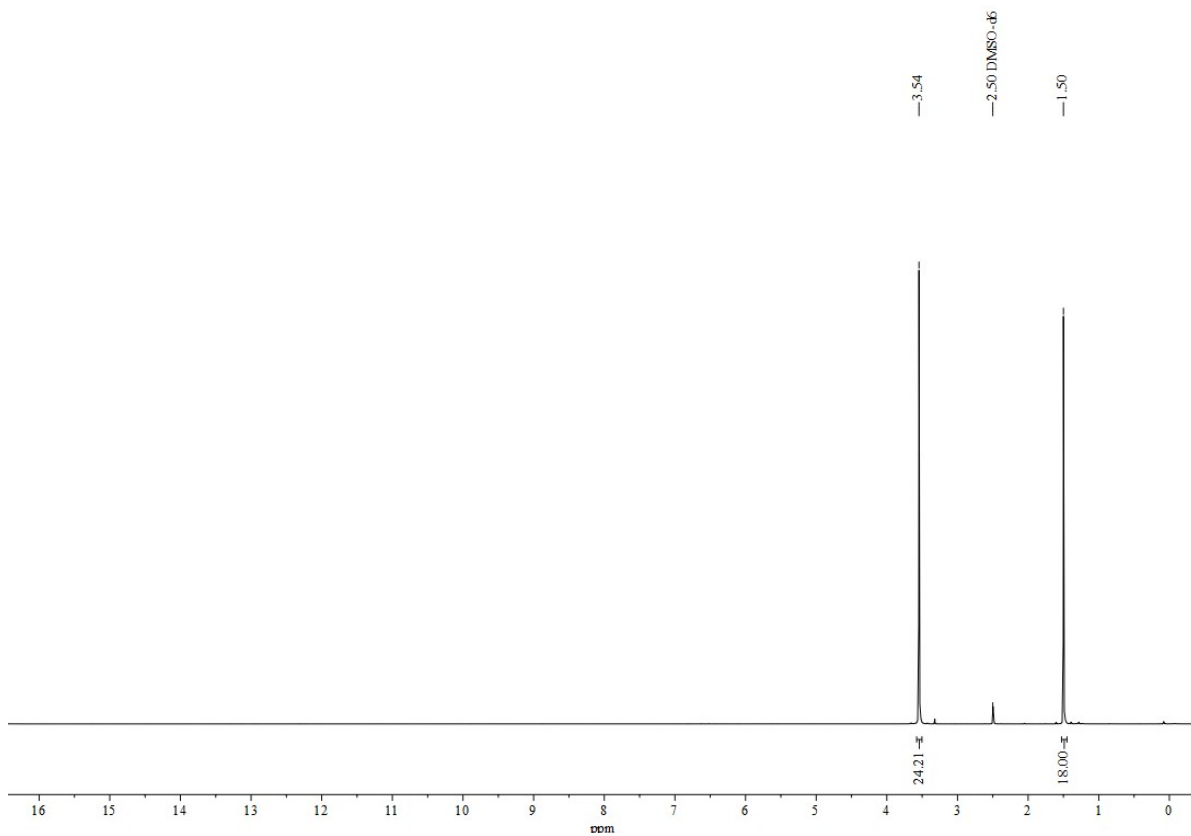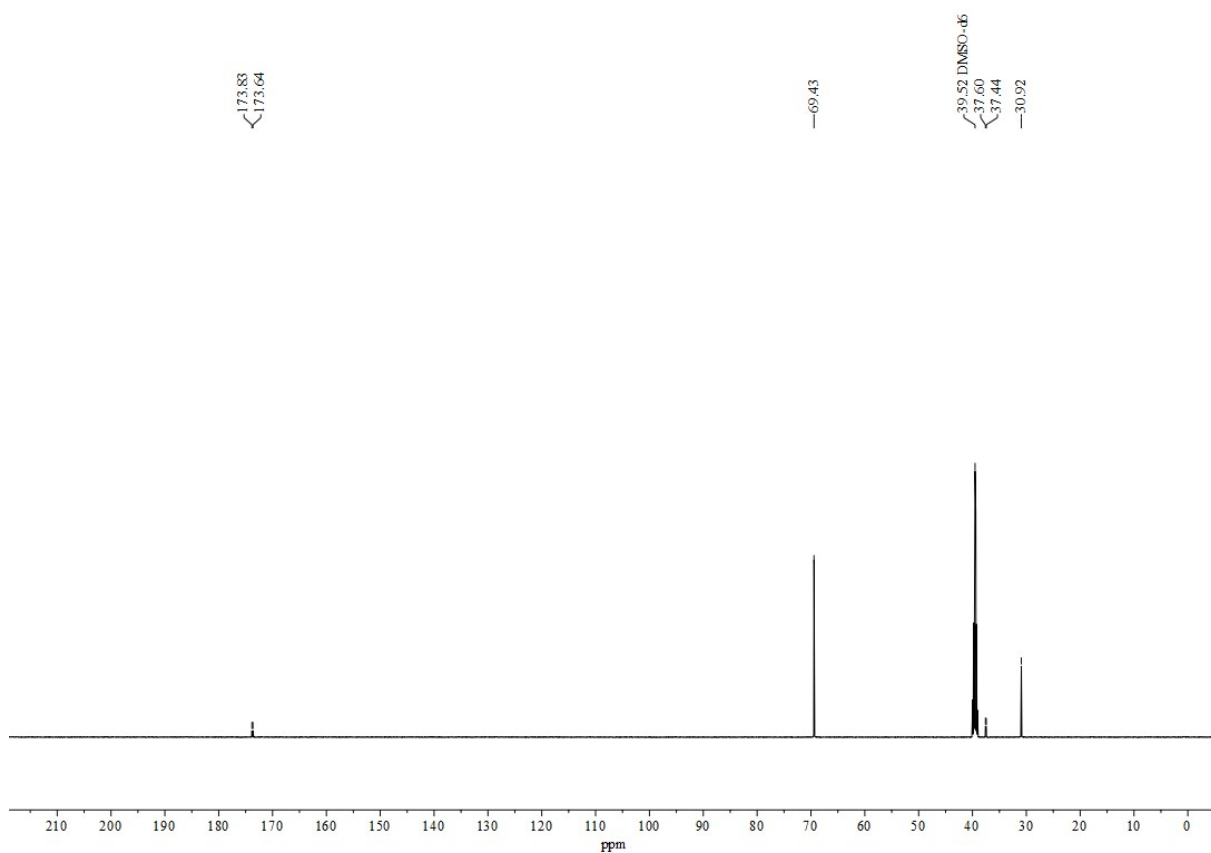



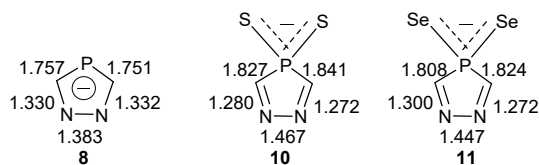

**Figure S27.** Comparison of selected bond lengths (Å) for complexes **8** , **10** and **11**

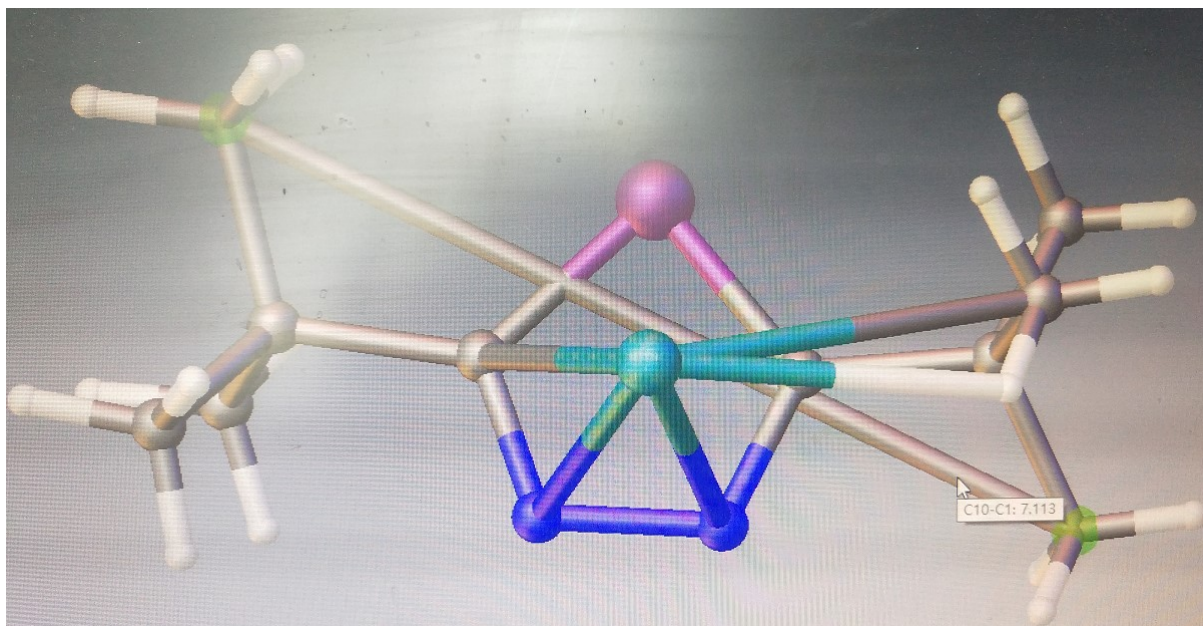

**Figure S28.** The distance between C1 and C10 is 7.113 Å in complex **8**

**Diameter of the diffusing particle (d) of complex 8 calculated by Stokes-Einstein equation (DOSY, Fig. 6 in article):**

according to the equation,  $D = KT/3\eta\pi d$

D: diffusion coefficient  $2.99226 \times 10^{-10} \text{ m}^2\text{s}^{-1}$ ;  $\pi$ : 3.1415926;

K: Boltzmann's constant 1.3806505 J·K; T: absolute temperature 298.15 K;

$\eta$ : DMSO solution viscosity at 298.15K  $1.987 \times 10^{-3} \text{ pa}\cdot\text{s}$ ;

d: diameter of the diffusing particle (m)

so  $d = KT/3\eta\pi D = 4.116409 \times 10^{-21} / 5.60362 \times 10^{-12} = 7.345 \times 10^{-10} \text{ m} = 7.345 \text{ Å}$

Table S1. Crystal structural analysis data for **4**

**Table 1 Crystal data and structure refinement for 20210506-1**

|                                             |                                                                                              |
|---------------------------------------------|----------------------------------------------------------------------------------------------|
| Identification code                         | 20210506-1                                                                                   |
| Empirical formula                           | C <sub>32</sub> H <sub>60</sub> Li <sub>2</sub> N <sub>4</sub> O <sub>4</sub> P <sub>2</sub> |
| Formula weight                              | 640.66                                                                                       |
| Temperature/K                               | 293(2)                                                                                       |
| Crystal system                              | tetragonal                                                                                   |
| Space group                                 | P-4n2                                                                                        |
| a/Å                                         | 14.3048(4)                                                                                   |
| b/Å                                         | 14.3048(4)                                                                                   |
| c/Å                                         | 9.9886(6)                                                                                    |
| α/°                                         | 90.00                                                                                        |
| β/°                                         | 90.00                                                                                        |
| γ/°                                         | 90.00                                                                                        |
| Volume/Å <sup>3</sup>                       | 2043.93(15)                                                                                  |
| Z                                           | 2                                                                                            |
| ρ <sub>calc</sub> /mg/mm <sup>3</sup>       | 1.041                                                                                        |
| m/mm <sup>-1</sup>                          | 0.141                                                                                        |
| F(000)                                      | 696.0                                                                                        |
| Crystal size/mm <sup>3</sup>                | 0.32 × 0.22 × 0.15                                                                           |
| 2θ range for data collection                | 5.72 to 51.3°                                                                                |
| Index ranges                                | -17 ≤ h ≤ 15, -17 ≤ k ≤ 17, -12 ≤ l ≤ 12                                                     |
| Reflections collected                       | 22779                                                                                        |
| Independent reflections                     | 1944[R(int) = 0.0402]                                                                        |
| Data/restraints/parameters                  | 1944/34/101                                                                                  |
| Goodness-of-fit on F <sup>2</sup>           | 1.050                                                                                        |
| Final R indexes [I ≥ 2σ (I)]                | R <sub>1</sub> = 0.0577, wR <sub>2</sub> = 0.1553                                            |
| Final R indexes [all data]                  | R <sub>1</sub> = 0.0730, wR <sub>2</sub> = 0.1666                                            |
| Largest diff. peak/hole / e Å <sup>-3</sup> | 0.20/-0.19                                                                                   |
| Flack parameter                             | 0.1(2)                                                                                       |

**Table 2 Fractional Atomic Coordinates (×10<sup>4</sup>) and Equivalent Isotropic Displacement Parameters (Å<sup>2</sup>×10<sup>3</sup>) for 20210506-1. U<sub>eq</sub> is defined as 1/3 of the trace of the orthogonalised U<sub>ij</sub> tensor.**

| Atom | x       | y       | z       | U(eq)     |
|------|---------|---------|---------|-----------|
| C1   | 1913(2) | 5974(2) | 3226(3) | 68.8(8)   |
| C2   | 2589(3) | 5496(3) | 4139(4) | 96.4(12)  |
| C3   | 2408(7) | 5771(6) | 5575(6) | 190(3)    |
| C4   | 3593(3) | 5667(4) | 3766(8) | 178(3)    |
| C5   | 1283(4) | 2394(3) | 3895(8) | 141.4(19) |

|     |            |            |          |           |
|-----|------------|------------|----------|-----------|
| C6  | 649(7)     | 1952(6)    | 4828(10) | 188(3)    |
| C7  | 207(6)     | 2670(8)    | 5559(10) | 207(4)    |
| C8  | 702(6)     | 3544(5)    | 5204(8)  | 179(3)    |
| Li6 | 800(3)     | 4200(3)    | 2500     | 70.4(15)  |
| N1  | 1109.9(16) | 5571.5(15) | 2909(2)  | 68.4(7)   |
| O1  | 1165(2)    | 3364.1(18) | 3996(3)  | 112.4(10) |
| P1  | 2076.8(5)  | 7076.8(5)  | 2500     | 76.3(4)   |

**Table 3 Anisotropic Displacement Parameters ( $\text{\AA}^2 \times 10^3$ ) for 20210506-1. The Anisotropic displacement factor exponent takes the form:  $-2\pi^2[h^2a^*U_{11}+\dots+2hka \times b \times U_{12}]$**

| Atom | $U_{11}$ | $U_{22}$ | $U_{33}$ | $U_{23}$ | $U_{13}$  | $U_{12}$ |
|------|----------|----------|----------|----------|-----------|----------|
| C1   | 74.1(18) | 55.3(16) | 76.8(18) | 3.0(13)  | -17.8(15) | -7.0(13) |
| C2   | 109(3)   | 66(2)    | 114(3)   | 18.4(19) | -52(2)    | -8.4(19) |
| C3   | 302(8)   | 163(5)   | 106(3)   | 8(3)     | -95(4)    | 69(6)    |
| C4   | 98(3)    | 154(5)   | 282(7)   | 94(5)    | -94(4)    | -23(3)   |
| C5   | 113(3)   | 92(3)    | 220(6)   | 37(3)    | -22(4)    | 4(3)     |
| C6   | 209(7)   | 141(4)   | 214(7)   | 60(5)    | -9(5)     | -54(4)   |
| C7   | 203(7)   | 220(7)   | 198(6)   | 63(5)    | 40(5)     | -25(5)   |
| C8   | 250(8)   | 154(5)   | 133(4)   | 38(4)    | 8(5)      | 17(5)    |
| Li6  | 64(2)    | 64(2)    | 84(4)    | 4(2)     | 4(2)      | -5(3)    |
| N1   | 73.7(14) | 58.6(13) | 73.0(14) | 11.2(11) | -17.3(11) | -8.6(10) |
| O1   | 130(2)   | 77.9(18) | 130(2)   | 30.6(16) | -15.6(19) | -0.6(15) |
| P1   | 64.5(4)  | 64.5(4)  | 100.0(8) | 18.9(5)  | -18.9(5)  | -11.9(4) |

**Table 4 Bond Lengths for 20210506-1.**

| Atom | Atom | Length/ $\text{\AA}$ | Atom | Atom             | Length/ $\text{\AA}$ |
|------|------|----------------------|------|------------------|----------------------|
| C1   | C2   | 1.495(5)             | C8   | O1               | 1.401(8)             |
| C1   | N1   | 1.323(3)             | Li6  | Li6 <sup>1</sup> | 3.237(13)            |
| C1   | P1   | 1.752(3)             | Li6  | N1 <sup>2</sup>  | 2.053(4)             |
| C2   | C3   | 1.511(8)             | Li6  | N1               | 2.053(4)             |
| C2   | C4   | 1.504(7)             | Li6  | O1               | 1.984(5)             |
| C5   | C6   | 1.447(9)             | Li6  | O1 <sup>2</sup>  | 1.984(5)             |
| C5   | O1   | 1.401(6)             | N1   | N1 <sup>3</sup>  | 1.362(4)             |
| C6   | C7   | 1.409(12)            | P1   | C1 <sup>3</sup>  | 1.752(3)             |
| C7   | C8   | 1.480(10)            |      |                  |                      |

$1-X, 1-Y, +Z; {}^2/2-Y, 1/2-X, 1/2-Z; {}^3-1/2+Y, 1/2+X, 1/2-Z$

**Table 5 Bond Angles for 20210506-1.**

| Atom | Atom | Atom | Angle/ $^\circ$ | Atom            | Atom | Atom             | Angle/ $^\circ$ |
|------|------|------|-----------------|-----------------|------|------------------|-----------------|
| C2   | C1   | P1   | 125.3(2)        | O1 <sup>2</sup> | Li6  | Li6 <sup>1</sup> | 127.77(18)      |

|                 |     |                  |            |                 |     |                 |            |
|-----------------|-----|------------------|------------|-----------------|-----|-----------------|------------|
| N1              | C1  | C2               | 120.5(3)   | O1              | Li6 | N1              | 111.66(11) |
| N1              | C1  | P1               | 114.2(2)   | O1 <sup>2</sup> | Li6 | N1              | 105.77(11) |
| C1              | C2  | C3               | 110.4(4)   | O1 <sup>2</sup> | Li6 | N1 <sup>2</sup> | 111.66(11) |
| C1              | C2  | C4               | 113.1(4)   | O1              | Li6 | N1 <sup>2</sup> | 105.77(11) |
| C4              | C2  | C3               | 110.9(6)   | O1 <sup>2</sup> | Li6 | O1              | 104.5(4)   |
| O1              | C5  | C6               | 108.1(6)   | C1              | N1  | Li6             | 130.6(2)   |
| C7              | C6  | C5               | 107.2(6)   | C1              | N1  | N1 <sup>3</sup> | 112.83(16) |
| C6              | C7  | C8               | 106.2(7)   | N1 <sup>3</sup> | N1  | Li6             | 107.38(18) |
| O1              | C8  | C7               | 106.1(7)   | C5              | O1  | Li6             | 125.1(4)   |
| N1              | Li6 | Li6 <sup>1</sup> | 58.45(17)  | C8              | O1  | C5              | 107.5(4)   |
| N1 <sup>2</sup> | Li6 | Li6 <sup>1</sup> | 58.45(17)  | C8              | O1  | Li6             | 114.4(4)   |
| N1 <sup>2</sup> | Li6 | N1               | 116.9(3)   | C1 <sup>3</sup> | P1  | C1              | 86.0(2)    |
| O1              | Li6 | Li6 <sup>1</sup> | 127.77(18) |                 |     |                 |            |

1-X,1-Y,+Z; <sup>2</sup>1/2-Y,1/2-X,1/2-Z; <sup>3</sup>-1/2+Y,1/2+X,1/2-Z

**Table 6 Torsion Angles for 20210506-1.**

| A                | B   | C  | D               | Angle/°    | A               | B   | C  | D               | Angle/°    |
|------------------|-----|----|-----------------|------------|-----------------|-----|----|-----------------|------------|
| C2               | C1  | N1 | Li6             | -39.1(5)   | N1 <sup>3</sup> | Li6 | N1 | N1 <sup>1</sup> | -37.72(18) |
| C2               | C1  | N1 | N1 <sup>1</sup> | 178.9(3)   | N1              | Li6 | O1 | C5              | -161.8(4)  |
| C2               | C1  | P1 | C1 <sup>1</sup> | -179.3(4)  | N1 <sup>3</sup> | Li6 | O1 | C5              | 70.0(4)    |
| C5               | C6  | C7 | C8              | -9.1(10)   | N1              | Li6 | O1 | C8              | 62.0(5)    |
| C6               | C5  | O1 | C8              | 17.3(7)    | N1 <sup>3</sup> | Li6 | O1 | C8              | -66.2(5)   |
| C6               | C5  | O1 | Li6             | -121.4(6)  | O1              | C5  | C6 | C7              | -4.6(9)    |
| C6               | C7  | C8 | O1              | 19.7(10)   | O1 <sup>3</sup> | Li6 | N1 | C1              | -56.3(3)   |
| C7               | C8  | O1 | C5              | -22.7(7)   | O1              | Li6 | N1 | C1              | 56.8(4)    |
| C7               | C8  | O1 | Li6             | 120.9(5)   | O1              | Li6 | N1 | N1 <sup>1</sup> | -159.7(3)  |
| Li6 <sup>2</sup> | Li6 | N1 | C1              | 178.7(3)   | O1 <sup>3</sup> | Li6 | N1 | N1 <sup>1</sup> | 87.3(3)    |
| Li6 <sup>2</sup> | Li6 | N1 | N1 <sup>1</sup> | -37.72(18) | O1 <sup>3</sup> | Li6 | O1 | C5              | -48.0(3)   |
| Li6 <sup>2</sup> | Li6 | O1 | C5              | 132.0(3)   | O1 <sup>3</sup> | Li6 | O1 | C8              | 175.8(4)   |
| Li6 <sup>2</sup> | Li6 | O1 | C8              | -4.2(4)    | P1              | C1  | C2 | C3              | 88.5(5)    |
| N1               | C1  | C2 | C3              | -91.0(6)   | P1              | C1  | C2 | C4              | -36.4(6)   |
| N1               | C1  | C2 | C4              | 144.0(5)   | P1              | C1  | N1 | Li6             | 141.31(18) |
| N1               | C1  | P1 | C1 <sup>1</sup> | 0.27(15)   | P1              | C1  | N1 | N1 <sup>1</sup> | -0.7(4)    |
| N1 <sup>3</sup>  | Li6 | N1 | C1              | 178.7(3)   |                 |     |    |                 |            |

1-1/2+Y,1/2+X,1/2-Z; <sup>2</sup>-X,1-Y,+Z; <sup>3</sup>1/2-Y,1/2-X,1/2-Z

**Table 7 Hydrogen Atom Coordinates (Å×10<sup>4</sup>) and Isotropic Displacement Parameters (Å<sup>2</sup>×10<sup>3</sup>) for 20210506-1.**

| Atom | x | y | z | U(eq) |
|------|---|---|---|-------|
|------|---|---|---|-------|

|     |      |      |      |     |
|-----|------|------|------|-----|
| H2  | 2476 | 4822 | 4066 | 116 |
| H3A | 2671 | 6377 | 5743 | 286 |
| H3B | 2691 | 5321 | 6162 | 286 |
| H3C | 1746 | 5789 | 5734 | 286 |
| H4A | 3674 | 5564 | 2823 | 267 |
| H4B | 3988 | 5246 | 4257 | 267 |
| H4C | 3758 | 6300 | 3979 | 267 |
| H5A | 1923 | 2226 | 4107 | 170 |
| H5B | 1148 | 2188 | 2990 | 170 |
| H6A | 188  | 1583 | 4350 | 225 |
| H6B | 990  | 1542 | 5428 | 225 |
| H7A | 254  | 2552 | 6512 | 248 |
| H7B | -448 | 2712 | 5318 | 248 |
| H8A | 260  | 4054 | 5096 | 214 |
| H8B | 1146 | 3712 | 5898 | 214 |

Table S2. Crystal structural analysis data for **5**

**Table 1 Crystal data and structure refinement for 150114-1a.**

|                     |                                                                               |
|---------------------|-------------------------------------------------------------------------------|
| Identification code | 150114-1a                                                                     |
| Empirical formula   | C <sub>20</sub> H <sub>36</sub> K <sub>2</sub> N <sub>4</sub> OP <sub>2</sub> |
| Formula weight      | 488.67                                                                        |
| Temperature/K       | 293(2)                                                                        |
| Crystal system      | triclinic                                                                     |
| Space group         | P-1                                                                           |
| a/Å                 | 10.3502(6)                                                                    |
| b/Å                 | 12.2677(7)                                                                    |
| c/Å                 | 12.9852(10)                                                                   |

|                                                |                                                                  |
|------------------------------------------------|------------------------------------------------------------------|
| $\alpha/^\circ$                                | 112.772(6)                                                       |
| $\beta/^\circ$                                 | 107.548(6)                                                       |
| $\gamma/^\circ$                                | 98.919(5)                                                        |
| Volume/ $\text{\AA}^3$                         | 1378.53(17)                                                      |
| Z                                              | 2                                                                |
| $\rho_{\text{calc}}/\text{g/cm}^3$             | 1.177                                                            |
| $\mu/\text{mm}^{-1}$                           | 0.476                                                            |
| F(000)                                         | 520.0                                                            |
| Crystal size/ $\text{mm}^3$                    | 0.23 × 0.12 × 0.1                                                |
| Radiation                                      | MoK $\alpha$ ( $\lambda = 0.71073$ )                             |
| 2 $\theta$ range for data collection/ $^\circ$ | 6.044 to 52.68                                                   |
| Index ranges                                   | -12 ≤ h ≤ 12, -15 ≤ k ≤ 15, -16 ≤ l ≤ 16                         |
| Reflections collected                          | 16722                                                            |
| Independent reflections                        | 5628 [ $R_{\text{int}} = 0.0396$ , $R_{\text{sigma}} = 0.0531$ ] |
| Data/restraints/parameters                     | 5628/12/270                                                      |
| Goodness-of-fit on $F^2$                       | 1.027                                                            |
| Final R indexes [ $I \geq 2\sigma(I)$ ]        | $R_1 = 0.0524$ , $wR_2 = 0.1304$                                 |
| Final R indexes [all data]                     | $R_1 = 0.0905$ , $wR_2 = 0.1535$                                 |
| Largest diff. peak/hole / $e \text{\AA}^{-3}$  | 0.29/-0.24                                                       |

**Table 2 Fractional Atomic Coordinates ( $\times 10^4$ ) and Equivalent Isotropic Displacement Parameters ( $\text{\AA}^2 \times 10^3$ ) for 150114-1a.  $U_{\text{eq}}$  is defined as 1/3 of the trace of the orthogonalised  $U_{ij}$  tensor.**

| Ato<br>m | x         | y         | z          | U(eq)     |
|----------|-----------|-----------|------------|-----------|
| K1       | 1770.9(7) | 6440.4(6) | 10593.3(6) | 63.2(2)   |
| P1       | 323.6(10) | 8184.2(8) | 12640.4(8) | 69.5(3)   |
| P2       | 4079.0(9) | 8889.4(7) | 10638.6(7) | 60.1(2)   |
| C8       | -1649(7)  | 9069(5)   | 10857(5)   | 139.8(19) |
| N3       | 4832(2)   | 7195(2)   | 11205(2)   | 51.0(6)   |
| N4       | 4306(2)   | 6652(2)   | 9952(2)    | 50.1(6)   |
| C7       | -795(7)   | 7802(6)   | 9425(5)    | 162(2)    |
| C15      | 4584(4)   | 7162(4)   | 7795(3)    | 102.1(14) |
| C13      | 3882(3)   | 7419(2)   | 9525(2)    | 49.3(7)   |
| C10      | 6998(4)   | 9722(4)   | 13553(3)   | 101.0(13) |
| C4       | 371(3)    | 6756(3)   | 12593(3)   | 59.0(8)   |
| C12      | 4795(3)   | 8354(3)   | 11690(3)   | 51.8(7)   |
| C14      | 3336(3)   | 6987(3)   | 8170(3)    | 63.9(8)   |
| C1       | 487(5)    | 5513(4)   | 13756(4)   | 109.2(15) |
| C3       | 1267(4)   | 6557(4)   | 13638(3)   | 78.7(10)  |

|     |           |           |            |           |
|-----|-----------|-----------|------------|-----------|
| C16 | 2327(4)   | 7672(4)   | 7779(3)    | 96.5(13)  |
| C11 | 5403(4)   | 9097(3)   | 13061(3)   | 70.1(9)   |
| C9  | 4665(5)   | 10077(4)  | 13489(4)   | 105.4(14) |
| C6  | -1506(4)  | 7843(4)   | 10249(3)   | 76.8(10)  |
| C5  | -831(3)   | 7334(3)   | 11098(3)   | 54.5(7)   |
| C2  | 2657(4)   | 6422(5)   | 13558(5)   | 127.4(19) |
| N2  | -1119(2)  | 6110(2)   | 10654(2)   | 54.8(6)   |
| N1  | -423(2)   | 5767(2)   | 11515(2)   | 56.0(6)   |
| K2  | 6747.1(6) | 5975.7(6) | 11662.1(6) | 55.5(2)   |
| O1  | 7410(4)   | 6771(3)   | 14104(2)   | 114.2(10) |
| C20 | 6512(6)   | 6285(6)   | 14485(5)   | 171(3)    |
| C17 | 8491(7)   | 7818(6)   | 15134(5)   | 165(3)    |
| C18 | 8279(7)   | 7904(6)   | 16175(5)   | 156(2)    |
| C19 | 6945(8)   | 6987(7)   | 15768(6)   | 167(3)    |

**Table 3 Anisotropic Displacement Parameters ( $\text{\AA}^2 \times 10^3$ ) for 150114-1a. The Anisotropic displacement factor exponent takes the form:  $-2\pi^2[h^2a^*2U_{11}+2hka^*b^*U_{12}+\dots]$ .**

| Ato<br>m | $U_{11}$ | $U_{22}$ | $U_{33}$ | $U_{23}$ | $U_{13}$ | $U_{12}$ |
|----------|----------|----------|----------|----------|----------|----------|
| K1       | 58.5(4)  | 48.4(4)  | 77.1(5)  | 19.6(3)  | 34.4(4)  | 11.9(3)  |
| P1       | 78.9(6)  | 49.9(5)  | 61.3(5)  | 17.1(4)  | 19.3(4)  | 12.2(4)  |
| P2       | 83.4(6)  | 37.5(5)  | 57.1(5)  | 22.6(4)  | 22.8(4)  | 20.7(4)  |
| C8       | 218(5)   | 127(4)   | 131(4)   | 80(3)    | 81(4)    | 118(4)   |
| N3       | 52.4(13) | 45.0(15) | 58.1(15) | 25.7(12) | 20.9(11) | 17.6(11) |
| N4       | 54.4(13) | 38.0(13) | 57.5(15) | 19.9(11) | 23.8(11) | 16.0(11) |
| C7       | 266(7)   | 206(6)   | 132(4)   | 127(4)   | 123(5)   | 158(5)   |
| C15      | 117(3)   | 112(4)   | 62(2)    | 28(2)    | 40(2)    | 18(3)    |
| C13      | 51.8(15) | 35.4(16) | 55.6(17) | 19.0(13) | 19.1(13) | 9.7(13)  |
| C10      | 102(3)   | 82(3)    | 64(2)    | 15(2)    | 1(2)     | 3(2)     |
| C4       | 51.3(16) | 59(2)    | 61.9(19) | 27.4(17) | 19.3(15) | 13.5(15) |
| C12      | 58.6(16) | 40.4(17) | 55.1(17) | 22.9(14) | 20.7(14) | 13.2(13) |
| C14      | 77(2)    | 45.3(19) | 53.7(18) | 19.5(15) | 15.4(16) | 7.9(16)  |
| C1       | 108(3)   | 115(4)   | 106(3)   | 75(3)    | 22(3)    | 17(3)    |
| C3       | 72(2)    | 82(3)    | 76(2)    | 41(2)    | 16.3(18) | 17.0(19) |
| C16      | 117(3)   | 94(3)    | 73(3)    | 45(2)    | 17(2)    | 40(3)    |
| C11      | 101(2)   | 50(2)    | 52.8(19) | 23.7(16) | 27.9(18) | 11.0(18) |
| C9       | 151(4)   | 92(3)    | 72(3)    | 23(2)    | 58(3)    | 46(3)    |
| C6       | 85(2)    | 79(3)    | 85(2)    | 52(2)    | 34(2)    | 36(2)    |
| C5       | 57.4(16) | 52(2)    | 59.3(18) | 25.3(15) | 28.3(15) | 19.5(15) |

|     |          |          |          |          |          |          |
|-----|----------|----------|----------|----------|----------|----------|
| C2  | 67(2)    | 187(6)   | 154(5)   | 116(4)   | 25(3)    | 45(3)    |
| N2  | 50.9(13) | 56.0(17) | 55.2(15) | 23.5(12) | 20.9(11) | 16.7(12) |
| N1  | 53.1(13) | 54.3(16) | 63.7(16) | 28.5(14) | 24.9(12) | 18.0(12) |
| K2  | 59.0(4)  | 48.9(4)  | 54.0(4)  | 17.9(3)  | 21.6(3)  | 22.0(3)  |
| O1  | 119(2)   | 138(3)   | 61.3(17) | 30.7(19) | 29.8(17) | 29(2)    |
| C20 | 118(4)   | 191(7)   | 111(5)   | 1(4)     | 47(4)    | -14(4)   |
| C17 | 188(6)   | 156(6)   | 94(4)    | 40(4)    | 42(4)    | -16(5)   |
| C18 | 182(6)   | 156(6)   | 71(3)    | 22(3)    | 32(4)    | 18(5)    |
| C19 | 183(6)   | 174(7)   | 140(6)   | 46(5)    | 103(5)   | 36(5)    |

**Table 4 Bond Lengths for 150114-1a.**

| Ato<br>m | Ato<br>m        | Length/Å   | Ato<br>m | Ato<br>m        | Length/Å   |
|----------|-----------------|------------|----------|-----------------|------------|
| K1       | P1              | 3.5887(12) | C4       | N1              | 1.337(4)   |
| K1       | P2              | 3.5057(11) | C4       | K2 <sup>2</sup> | 3.421(3)   |
| K1       | N3              | 2.920(2)   | C12      | C11             | 1.512(4)   |
| K1       | N4              | 2.986(2)   | C14      | C16             | 1.528(5)   |
| K1       | C13             | 3.232(3)   | C1       | C3              | 1.489(5)   |
| K1       | C4              | 3.264(3)   | C3       | C2              | 1.503(5)   |
| K1       | C12             | 3.128(3)   | C11      | C9              | 1.536(5)   |
| K1       | C5              | 3.211(3)   | C6       | C5              | 1.515(4)   |
| K1       | N2              | 2.984(2)   | C5       | N2              | 1.328(4)   |
| K1       | N2 <sup>1</sup> | 2.762(3)   | C5       | K2 <sup>2</sup> | 3.218(3)   |
| K1       | N1              | 3.016(2)   | N2       | K1 <sup>1</sup> | 2.762(3)   |
| K1       | N1 <sup>1</sup> | 2.750(3)   | N2       | N1              | 1.385(3)   |
| P1       | C4              | 1.738(3)   | N2       | K2 <sup>2</sup> | 2.902(2)   |
| P1       | C5              | 1.755(3)   | N1       | K1 <sup>1</sup> | 2.750(3)   |
| P1       | K2 <sup>2</sup> | 3.7479(11) | N1       | K2 <sup>2</sup> | 3.035(2)   |
| P2       | C13             | 1.753(3)   | K2       | K1 <sup>3</sup> | 4.1369(9)  |
| P2       | C12             | 1.755(3)   | K2       | P1 <sup>4</sup> | 3.7480(11) |
| C8       | C6              | 1.459(6)   | K2       | N4 <sup>3</sup> | 2.876(2)   |
| N3       | N4              | 1.380(3)   | K2       | C4 <sup>4</sup> | 3.421(3)   |
| N3       | C12             | 1.327(4)   | K2       | C5 <sup>4</sup> | 3.218(3)   |
| N3       | K2              | 2.723(2)   | K2       | N2 <sup>4</sup> | 2.902(2)   |
| N4       | C13             | 1.331(3)   | K2       | N1 <sup>4</sup> | 3.035(2)   |
| N4       | K2 <sup>3</sup> | 2.876(2)   | K2       | K2 <sup>3</sup> | 4.1650(13) |
| N4       | K2              | 3.270(2)   | K2       | O1              | 2.750(3)   |
| C7       | C6              | 1.461(6)   | O1       | C20             | 1.341(6)   |
| C15      | C14             | 1.525(5)   | O1       | C17             | 1.419(6)   |



|     |     |          |     |     |          |
|-----|-----|----------|-----|-----|----------|
| C13 | C14 | 1.511(4) | C20 | C19 | 1.427(7) |
| C10 | C11 | 1.521(5) | C17 | C18 | 1.400(6) |
| C4  | C3  | 1.527(4) | C18 | C19 | 1.438(7) |

1-X,1-Y,2-Z; <sup>2</sup>-1+X,+Y,+Z; <sup>3</sup>1-X,1-Y,2-Z; <sup>4</sup>1+X,+Y,+Z

**Table 5 Bond Angles for 150114-1a.**

| Ato<br>m | Ato<br>m | Ato<br>m | Angle/°   | Ato<br>m        | Ato<br>m | Ato<br>m        | Angle/°    |
|----------|----------|----------|-----------|-----------------|----------|-----------------|------------|
| P2       | K1       | P1       | 99.69(3)  | N3              | C12      | P2              | 115.1(2)   |
| N3       | K1       | P1       | 120.25(5) | N3              | C12      | C11             | 118.5(3)   |
| N3       | K1       | P2       | 46.84(5)  | C11             | C12      | K1              | 113.75(18) |
| N3       | K1       | N4       | 26.98(6)  | C11             | C12      | P2              | 126.3(2)   |
| N3       | K1       | C13      | 42.51(7)  | C15             | C14      | C16             | 110.4(3)   |
| N3       | K1       | C4       | 124.02(7) | C13             | C14      | C15             | 109.9(3)   |
| N3       | K1       | C12      | 25.04(7)  | C13             | C14      | C16             | 111.7(3)   |
| N3       | K1       | C5       | 145.23(8) | C1              | C3       | C4              | 113.3(3)   |
| N3       | K1       | N2       | 165.09(7) | C1              | C3       | C2              | 111.9(4)   |
| N3       | K1       | N1       | 143.17(7) | C2              | C3       | C4              | 111.2(3)   |
| N4       | K1       | P1       | 142.09(5) | C10             | C11      | C9              | 109.9(3)   |
| N4       | K1       | P2       | 46.59(5)  | C12             | C11      | C10             | 110.5(3)   |
| N4       | K1       | C13      | 24.31(6)  | C12             | C11      | C9              | 112.1(3)   |
| N4       | K1       | C4       | 150.89(7) | C8              | C6       | C7              | 111.7(4)   |
| N4       | K1       | C12      | 43.04(7)  | C8              | C6       | C5              | 114.5(3)   |
| N4       | K1       | C5       | 153.38(7) | C7              | C6       | C5              | 111.6(3)   |
| N4       | K1       | N1       | 163.72(7) | K1              | C5       | K2 <sup>2</sup> | 127.81(10) |
| C13      | K1       | P1       | 129.02(6) | P1              | C5       | K1              | 87.39(11)  |
| C13      | K1       | P2       | 29.81(5)  | P1              | C5       | K2 <sup>2</sup> | 93.10(11)  |
| C13      | K1       | C4       | 153.98(8) | C6              | C5       | K1              | 111.39(19) |
| C4       | K1       | P1       | 28.89(6)  | C6              | C5       | P1              | 127.4(3)   |
| C4       | K1       | P2       | 124.54(6) | C6              | C5       | K2 <sup>2</sup> | 109.20(19) |
| C12      | K1       | P1       | 99.40(6)  | N2              | C5       | K1              | 68.19(15)  |
| C12      | K1       | P2       | 29.99(5)  | N2              | C5       | P1              | 114.4(2)   |
| C12      | K1       | C13      | 43.97(7)  | N2              | C5       | C6              | 118.2(3)   |
| C12      | K1       | C4       | 113.01(8) | N2              | C5       | K2 <sup>2</sup> | 64.36(14)  |
| C12      | K1       | C5       | 120.76(8) | K1 <sup>1</sup> | N2       | K1              | 90.45(7)   |
| C5       | K1       | P1       | 29.25(6)  | K1 <sup>1</sup> | N2       | K2 <sup>2</sup> | 93.81(7)   |
| C5       | K1       | P2       | 107.92(6) | C5              | N2       | K1              | 87.40(16)  |
| C5       | K1       | C13      | 129.64(8) | C5              | N2       | K1 <sup>1</sup> | 171.6(2)   |

|                 |    |                 |           |                 |    |                 |           |
|-----------------|----|-----------------|-----------|-----------------|----|-----------------|-----------|
| C5              | K1 | C4              | 43.28(7)  | C5              | N2 | N1              | 112.5(2)  |
| N2              | K1 | P1              | 45.52(5)  | C5              | N2 | K2 <sup>2</sup> | 91.27(16) |
| N2 <sup>1</sup> | K1 | P1              | 128.12(5) | N1              | N2 | K1 <sup>1</sup> | 74.94(16) |
| N2              | K1 | P2              | 131.27(6) | N1              | N2 | K1              | 77.92(14) |
| N2 <sup>1</sup> | K1 | P2              | 132.17(5) | N1              | N2 | K2 <sup>2</sup> | 81.96(14) |
| N2 <sup>1</sup> | K1 | N3              | 100.26(7) | K2 <sup>2</sup> | N2 | K1              | 157.58(9) |
| N2              | K1 | N4              | 167.01(7) | K1 <sup>1</sup> | N1 | K1              | 90.03(7)  |
| N2 <sup>1</sup> | K1 | N4              | 87.69(6)  | K1              | N1 | K2 <sup>2</sup> | 145.17(9) |
| N2 <sup>1</sup> | K1 | C13             | 102.57(7) | K1 <sup>1</sup> | N1 | K2 <sup>2</sup> | 91.17(7)  |
| N2              | K1 | C13             | 145.98(7) | C4              | N1 | K1 <sup>1</sup> | 171.4(2)  |
| N2              | K1 | C4              | 41.98(7)  | C4              | N1 | K1              | 88.40(16) |
| N2 <sup>1</sup> | K1 | C4              | 102.10(8) | C4              | N1 | N2              | 111.8(3)  |
| N2              | K1 | C12             | 144.02(8) | C4              | N1 | K2 <sup>2</sup> | 94.95(17) |
| N2 <sup>1</sup> | K1 | C12             | 125.26(8) | N2              | N1 | K1              | 75.39(14) |
| N2              | K1 | C5              | 24.41(7)  | N2              | N1 | K1 <sup>1</sup> | 75.95(16) |
| N2 <sup>1</sup> | K1 | C5              | 113.70(8) | N2              | N1 | K2 <sup>2</sup> | 71.18(13) |
| N2 <sup>1</sup> | K1 | N2              | 89.55(7)  | K1 <sup>3</sup> | K2 | K2 <sup>3</sup> | 75.77(2)  |
| N2 <sup>1</sup> | K1 | N1              | 82.70(7)  | P1 <sup>4</sup> | K2 | K1 <sup>3</sup> | 81.87(2)  |
| N2              | K1 | N1              | 26.69(6)  | P1 <sup>4</sup> | K2 | K2 <sup>3</sup> | 132.56(3) |
| N1              | K1 | P1              | 45.41(5)  | N3              | K2 | K1 <sup>3</sup> | 131.50(5) |
| N1 <sup>1</sup> | K1 | P1              | 129.01(5) | N3              | K2 | P1 <sup>4</sup> | 105.68(5) |
| N1 <sup>1</sup> | K1 | P2              | 119.42(5) | N3              | K2 | N4 <sup>3</sup> | 113.54(7) |
| N1              | K1 | P2              | 145.07(6) | N3              | K2 | N4              | 24.50(6)  |
| N1 <sup>1</sup> | K1 | N3              | 110.47(7) | N3              | K2 | C4 <sup>4</sup> | 133.26(8) |
| N1 <sup>1</sup> | K1 | N4              | 87.95(7)  | N3              | K2 | C5 <sup>4</sup> | 98.49(7)  |
| N1 <sup>1</sup> | K1 | C13             | 91.85(7)  | N3              | K2 | N2 <sup>4</sup> | 115.57(7) |
| N1              | K1 | C13             | 171.94(8) | N3              | K2 | N1 <sup>4</sup> | 140.44(7) |
| N1              | K1 | C4              | 24.17(7)  | N3              | K2 | K2 <sup>3</sup> | 63.98(5)  |
| N1 <sup>1</sup> | K1 | C4              | 113.86(7) | N3              | K2 | O1              | 99.50(9)  |
| N1              | K1 | C12             | 137.03(7) | N4              | K2 | K1 <sup>3</sup> | 107.19(4) |
| N1 <sup>1</sup> | K1 | C12             | 130.97(7) | N4 <sup>3</sup> | K2 | K1 <sup>3</sup> | 46.21(4)  |
| N1 <sup>1</sup> | K1 | C5              | 103.08(8) | N4 <sup>3</sup> | K2 | P1 <sup>4</sup> | 127.63(5) |
| N1              | K1 | C5              | 42.34(7)  | N4              | K2 | P1 <sup>4</sup> | 108.92(4) |
| N1 <sup>1</sup> | K1 | N2 <sup>1</sup> | 29.10(7)  | N4 <sup>3</sup> | K2 | N4              | 94.95(6)  |
| N1 <sup>1</sup> | K1 | N2              | 83.50(7)  | N4              | K2 | C4 <sup>4</sup> | 132.85(7) |
| N1 <sup>1</sup> | K1 | N1              | 89.97(7)  | N4 <sup>3</sup> | K2 | C4 <sup>4</sup> | 105.43(7) |
| K1              | P1 | K2 <sup>2</sup> | 103.78(3) | N4 <sup>3</sup> | K2 | C5 <sup>4</sup> | 110.58(7) |
| C4              | P1 | K1              | 65.14(10) | N4 <sup>3</sup> | K2 | N2 <sup>4</sup> | 87.23(7)  |
| C4              | P1 | C5              | 86.25(15) | N4 <sup>3</sup> | K2 | N1 <sup>4</sup> | 84.77(7)  |
| C4              | P1 | K2 <sup>2</sup> | 65.67(10) | N4              | K2 | K2 <sup>3</sup> | 43.47(4)  |

|                 |     |                 |            |                 |     |                 |            |
|-----------------|-----|-----------------|------------|-----------------|-----|-----------------|------------|
| C5              | P1  | K1              | 63.35(9)   | N4 <sup>3</sup> | K2  | K2 <sup>3</sup> | 51.47(5)   |
| C5              | P1  | K2 <sup>2</sup> | 59.02(9)   | C4 <sup>4</sup> | K2  | K1 <sup>3</sup> | 64.48(6)   |
| C13             | P2  | K1              | 66.42(9)   | C4 <sup>4</sup> | K2  | P1 <sup>4</sup> | 27.58(6)   |
| C13             | P2  | C12             | 85.58(14)  | C4 <sup>4</sup> | K2  | K2 <sup>3</sup> | 135.87(6)  |
| C12             | P2  | K1              | 63.00(9)   | C5 <sup>4</sup> | K2  | K1 <sup>3</sup> | 66.04(6)   |
| N4              | N3  | K1              | 79.18(13)  | C5 <sup>4</sup> | K2  | P1 <sup>4</sup> | 27.88(5)   |
| N4              | N3  | K2              | 100.57(15) | C5 <sup>4</sup> | K2  | N4              | 91.12(7)   |
| C12             | N3  | K1              | 86.26(16)  | C5 <sup>4</sup> | K2  | C4 <sup>4</sup> | 42.04(7)   |
| C12             | N3  | N4              | 112.2(2)   | C5 <sup>4</sup> | K2  | K2 <sup>3</sup> | 104.95(6)  |
| C12             | N3  | K2              | 136.20(19) | N2 <sup>4</sup> | K2  | K1 <sup>3</sup> | 41.78(5)   |
| K2              | N3  | K1              | 129.19(9)  | N2 <sup>4</sup> | K2  | P1 <sup>4</sup> | 43.83(5)   |
| K1              | N4  | K2              | 109.05(7)  | N2 <sup>4</sup> | K2  | N4              | 100.40(6)  |
| N3              | N4  | K1              | 73.84(12)  | N2 <sup>4</sup> | K2  | C4 <sup>4</sup> | 40.74(7)   |
| N3              | N4  | K2              | 54.93(12)  | N2 <sup>4</sup> | K2  | C5 <sup>4</sup> | 24.38(7)   |
| N3              | N4  | K2 <sup>3</sup> | 125.73(16) | N2 <sup>4</sup> | K2  | N1 <sup>4</sup> | 26.86(7)   |
| C13             | N4  | K1              | 88.23(15)  | N2 <sup>4</sup> | K2  | K2 <sup>3</sup> | 96.23(5)   |
| C13             | N4  | N3              | 112.1(2)   | N1 <sup>4</sup> | K2  | K1 <sup>3</sup> | 41.65(5)   |
| C13             | N4  | K2 <sup>3</sup> | 118.78(18) | N1 <sup>4</sup> | K2  | P1 <sup>4</sup> | 43.58(5)   |
| C13             | N4  | K2              | 151.24(17) | N1 <sup>4</sup> | K2  | N4              | 127.25(6)  |
| K2 <sup>3</sup> | N4  | K1              | 89.74(6)   | N1 <sup>4</sup> | K2  | C4 <sup>4</sup> | 22.92(7)   |
| K2 <sup>3</sup> | N4  | K2              | 85.06(6)   | N1 <sup>4</sup> | K2  | C5 <sup>4</sup> | 42.17(7)   |
| P2              | C13 | K1              | 83.77(10)  | N1 <sup>4</sup> | K2  | K2 <sup>3</sup> | 114.36(5)  |
| N4              | C13 | K1              | 67.46(14)  | O1              | K2  | K1 <sup>3</sup> | 128.99(7)  |
| N4              | C13 | P2              | 115.0(2)   | O1              | K2  | P1 <sup>4</sup> | 85.78(8)   |
| N4              | C13 | C14             | 118.9(2)   | O1              | K2  | N4 <sup>3</sup> | 118.77(9)  |
| C14             | C13 | K1              | 118.25(17) | O1              | K2  | N4              | 123.60(8)  |
| C14             | C13 | P2              | 126.1(2)   | O1              | K2  | C4 <sup>4</sup> | 82.64(9)   |
| K1              | C4  | K2 <sup>2</sup> | 119.44(9)  | O1              | K2  | C5 <sup>4</sup> | 113.63(10) |
| P1              | C4  | K1              | 85.96(11)  | O1              | K2  | N2 <sup>4</sup> | 123.24(9)  |
| P1              | C4  | K2 <sup>2</sup> | 86.75(11)  | O1              | K2  | N1 <sup>4</sup> | 101.29(9)  |
| C3              | C4  | K1              | 112.2(2)   | O1              | K2  | K2 <sup>3</sup> | 140.09(8)  |
| C3              | C4  | P1              | 125.9(3)   | C20             | O1  | K2              | 120.7(3)   |
| C3              | C4  | K2 <sup>2</sup> | 120.24(19) | C20             | O1  | C17             | 107.9(4)   |
| N1              | C4  | K1              | 67.43(15)  | C17             | O1  | K2              | 130.4(3)   |
| N1              | C4  | P1              | 115.1(2)   | O1              | C20 | C19             | 110.8(5)   |
| N1              | C4  | C3              | 119.0(3)   | C18             | C17 | O1              | 108.5(5)   |
| N1              | C4  | K2 <sup>2</sup> | 62.13(14)  | C17             | C18 | C19             | 107.1(5)   |
| P2              | C12 | K1              | 87.01(10)  | C20             | C19 | C18             | 105.2(5)   |
| N3              | C12 | K1              | 68.70(15)  |                 |     |                 |            |

1-X,1-Y,2-Z; <sup>2</sup>-1+X,+Y,+Z; <sup>3</sup>1-X,1-Y,2-Z; <sup>4</sup>1+X,+Y,+Z

**Table 6 Torsion Angles for 150114-1a.**

| A               | B   | C   | D               | Angle/°     | A               | B  | C   | D               | Angle/°     |
|-----------------|-----|-----|-----------------|-------------|-----------------|----|-----|-----------------|-------------|
| K1              | P1  | C4  | C3              | 114.6(3)    | C13             | P2 | C12 | N3              | -1.0(2)     |
| K1              | P1  | C4  | N1              | -62.8(2)    | C13             | P2 | C12 | C11             | 176.7(3)    |
| K1              | P1  | C4  | K2 <sup>1</sup> | -119.84(8)  | C4              | P1 | C5  | K1              | -64.00(11)  |
| K1              | P1  | C5  | C6              | -115.1(3)   | C4              | P1 | C5  | C6              | -179.1(3)   |
| K1              | P1  | C5  | N2              | 64.59(19)   | C4              | P1 | C5  | N2              | 0.6(2)      |
| K1              | P1  | C5  | K2 <sup>1</sup> | 127.75(10)  | C4              | P1 | C5  | K2 <sup>1</sup> | 63.75(11)   |
| K1              | P2  | C13 | N4              | -61.56(18)  | C12             | P2 | C13 | K1              | 62.41(10)   |
| K1              | P2  | C13 | C14             | 120.6(3)    | C12             | P2 | C13 | N4              | 0.9(2)      |
| K1              | P2  | C12 | N3              | 64.78(19)   | C12             | P2 | C13 | C14             | -176.9(3)   |
| K1              | P2  | C12 | C11             | -117.5(3)   | C12             | N3 | N4  | K1              | -81.38(19)  |
| K1              | N3  | N4  | C13             | 81.22(19)   | C12             | N3 | N4  | C13             | -0.2(3)     |
| K1              | N3  | N4  | K2              | -128.22(9)  | C12             | N3 | N4  | K2              | 150.4(2)    |
| K1              | N3  | N4  | K2 <sup>2</sup> | -77.63(14)  | C12             | N3 | N4  | K2 <sup>2</sup> | -159.01(17) |
| K1              | N3  | C12 | P2              | -75.86(17)  | C3              | C4 | N1  | K1              | -103.7(3)   |
| K1              | N3  | C12 | C11             | 106.3(2)    | C3              | C4 | N1  | N2              | -177.3(2)   |
| K1              | N4  | C13 | P2              | 71.16(16)   | C3              | C4 | N1  | K2 <sup>1</sup> | 111.0(2)    |
| K1              | N4  | C13 | C14             | -110.9(2)   | C6              | C5 | N2  | K1              | 103.4(2)    |
| K1              | C13 | C14 | C15             | -160.6(2)   | C6              | C5 | N2  | N1              | 179.2(2)    |
| K1              | C13 | C14 | C16             | 76.6(3)     | C6              | C5 | N2  | K2 <sup>1</sup> | -99.0(2)    |
| K1              | C4  | C3  | C1              | -120.0(3)   | C5              | P1 | C4  | K1              | 62.29(10)   |
| K1              | C4  | C3  | C2              | 7.0(4)      | C5              | P1 | C4  | C3              | 176.9(3)    |
| K1              | C4  | N1  | N2              | -73.57(18)  | C5              | P1 | C4  | N1              | -0.5(2)     |
| K1              | C4  | N1  | K2 <sup>1</sup> | -145.27(10) | C5              | P1 | C4  | K2 <sup>1</sup> | -57.55(10)  |
| K1              | C12 | C11 | C10             | 163.8(2)    | C5              | N2 | N1  | K1 <sup>3</sup> | -175.8(2)   |
| K1              | C12 | C11 | C9              | -73.2(3)    | C5              | N2 | N1  | K1              | -82.02(19)  |
| K1              | C5  | N2  | N1              | 75.79(18)   | C5              | N2 | N1  | C4              | 0.2(3)      |
| K1              | C5  | N2  | K2 <sup>1</sup> | 157.61(9)   | C5              | N2 | N1  | K2 <sup>1</sup> | 88.0(2)     |
| K1              | N2  | N1  | K1 <sup>3</sup> | -93.77(5)   | N1              | C4 | C3  | C1              | -44.3(5)    |
| K1 <sup>3</sup> | N2  | N1  | K1              | 93.77(5)    | N1              | C4 | C3  | C2              | 82.7(4)     |
| K1 <sup>3</sup> | N2  | N1  | C4              | 176.0(2)    | K2 <sup>1</sup> | P1 | C4  | K1              | 119.84(8)   |
| K1              | N2  | N1  | C4              | 82.2(2)     | K2 <sup>1</sup> | P1 | C4  | C3              | -125.5(3)   |
| K1 <sup>3</sup> | N2  | N1  | K2 <sup>1</sup> | -96.17(5)   | K2 <sup>1</sup> | P1 | C4  | N1              | 57.08(19)   |
| K1              | N2  | N1  | K2 <sup>1</sup> | 170.06(7)   | K2 <sup>1</sup> | P1 | C5  | K1              | -127.75(10) |
| P1              | C4  | C3  | C1              | 138.4(3)    | K2 <sup>1</sup> | P1 | C5  | C6              | 117.1(3)    |
| P1              | C4  | C3  | C2              | -94.6(4)    | K2 <sup>1</sup> | P1 | C5  | N2              | -63.16(18)  |
| P1              | C4  | N1  | K1              | 73.82(18)   | K2              | N3 | N4  | K1              | 128.22(9)   |
| P1              | C4  | N1  | N2              | 0.3(3)      | K2              | N3 | N4  | C13             | -150.55(17) |

|                          |            |                                       |            |
|--------------------------|------------|---------------------------------------|------------|
| P1 C4 N1 K2 <sup>1</sup> | -71.44(19) | K2 N3 N4 K2 <sup>2</sup>              | 50.60(17)  |
| P1 C5 N2 K1              | -76.37(16) | K2 N3 C12 K1                          | -147.9(2)  |
| P1 C5 N2 N1              | -0.6(3)    | K2 N3 C12 P2                          | 136.28(18) |
| P1 C5 N2 K2 <sup>1</sup> | 81.24(17)  | K2 N3 C12 C11                         | -41.6(4)   |
| P2 C13 C14 C15           | 95.6(3)    | K2 <sup>2</sup> N4 C13 K1             | 88.73(12)  |
| P2 C13 C14 C16           | -27.3(4)   | K2 N4 C13 K1                          | -128.5(4)  |
| P2 C12 C11 C10           | -91.5(4)   | K2 N4 C13 P2                          | -57.3(4)   |
| P2 C12 C11 C9            | 31.5(4)    | K2 <sup>2</sup> N4 C13 P2             | 159.89(11) |
| C8 C6 C5 K1              | -128.4(3)  | K2 N4 C13 C14                         | 120.6(3)   |
| C8 C6 C5 P1              | -24.6(5)   | K2 <sup>2</sup> N4 C13 C14            | -22.1(3)   |
| C8 C6 C5 N2              | 155.7(4)   | K2 <sup>1</sup> C4 C3 C1              | 28.5(4)    |
| C8 C6 C5 K2 <sup>1</sup> | 85.2(4)    | K2 <sup>1</sup> C4 C3 C2              | 155.5(3)   |
| N3 N4 C13 K1             | -71.74(17) | K2 <sup>1</sup> C4 N1 K1              | 145.27(10) |
| N3 N4 C13 P2             | -0.6(3)    | K2 <sup>1</sup> C4 N1 N2              | 71.70(18)  |
| N3 N4 C13 C14            | 177.4(2)   | K2 <sup>1</sup> C5 N2 K1              | -157.61(9) |
| N3 C12 C11 C10           | 86.1(4)    | K2 <sup>1</sup> C5 N2 N1              | -81.82(18) |
| N3 C12 C11 C9            | -150.9(3)  | K2 <sup>1</sup> N2 N1 K1 <sup>3</sup> | 96.17(5)   |
| N4 N3 C12 K1             | 76.71(17)  | K2 <sup>1</sup> N2 N1 K1              | -170.06(7) |
| N4 N3 C12 P2             | 0.8(3)     | K2 <sup>1</sup> N2 N1 C4              | -87.8(2)   |
| N4 N3 C12 C11            | -177.0(2)  | K2 O1 C20 C19                         | -169.3(4)  |
| N4 C13 C14 C15           | -82.1(3)   | K2 O1 C17 C18                         | 172.7(4)   |
| N4 C13 C14 C16           | 155.0(3)   | O1 C20 C19 C18                        | -4.8(9)    |
| C7 C6 C5 K1              | -0.3(4)    | O1 C17 C18 C19                        | -7.1(8)    |
| C7 C6 C5 P1              | 103.5(4)   | C20 O1 C17 C18                        | 4.2(8)     |
| C7 C6 C5 N2              | -76.2(4)   | C17 O1 C20 C19                        | 0.5(8)     |
| C7 C6 C5 K2 <sup>1</sup> | -146.8(4)  | C17 C18 C19 C20                       | 7.2(9)     |
| C13 P2 C12 K1            | -65.73(10) |                                       |            |

1-1+X,+Y,+Z; <sup>2</sup>1-X,1-Y,2-Z; <sup>3</sup>-X,1-Y,2-Z

**Table 7 Hydrogen Atom Coordinates ( $\text{\AA}\times 10^4$ ) and Isotropic Displacement Parameters ( $\text{\AA}^2\times 10^3$ ) for 150114-1a.**

| Ato<br>m | x     | y    | z     | U(eq) |
|----------|-------|------|-------|-------|
| H8A      | -720  | 9672 | 11341 | 210   |
| H8B      | -2144 | 9056 | 11372 | 210   |
| H8C      | -2176 | 9286 | 10259 | 210   |
| H7A      | -1351 | 7976 | 8803  | 243   |
| H7B      | -698  | 6990 | 9056  | 243   |

|      |       |       |       |     |
|------|-------|-------|-------|-----|
| H7C  | 131   | 8411  | 9873  | 243 |
| H15A | 5148  | 8022  | 8233  | 153 |
| H15B | 4229  | 6907  | 6937  | 153 |
| H15C | 5162  | 6667  | 7979  | 153 |
| H10A | 7458  | 9102  | 13306 | 152 |
| H10B | 7374  | 10162 | 14425 | 152 |
| H10C | 7170  | 10295 | 13238 | 152 |
| H14  | 2809  | 6098  | 7752  | 77  |
| H1A  | -338  | 5677  | 13895 | 164 |
| H1B  | 1101  | 5436  | 14427 | 164 |
| H1C  | 196   | 4754  | 13020 | 164 |
| H3   | 1502  | 7315  | 14390 | 94  |
| H16A | 2838  | 8541  | 8148  | 145 |
| H16B | 1557  | 7567  | 8033  | 145 |
| H16C | 1954  | 7338  | 6909  | 145 |
| H11  | 5253  | 8521  | 13397 | 84  |
| H9A  | 5082  | 10527 | 14362 | 158 |
| H9B  | 3668  | 9672  | 13217 | 158 |
| H9C  | 4784  | 10643 | 13157 | 158 |
| H6   | -2477 | 7274  | 9735  | 92  |
| H2A  | 2475  | 5705  | 12815 | 191 |
| H2B  | 3212  | 6325  | 14238 | 191 |
| H2C  | 3173  | 7150  | 13569 | 191 |
| H20A | 6490  | 5432  | 14284 | 206 |
| H20B | 5558  | 6281  | 14069 | 206 |
| H17A | 9422  | 7726  | 15197 | 198 |
| H17B | 8447  | 8568  | 15056 | 198 |
| H18A | 8248  | 8729  | 16644 | 187 |
| H18B | 9050  | 7745  | 16684 | 187 |
| H19A | 7066  | 6456  | 16159 | 201 |
| H19B | 6244  | 7382  | 15949 | 201 |

Table S3. Crystal structural analysis data for **6**

**Table 1 Crystal data and structure refinement for 141224-1o.**

|                     |                                                                                             |
|---------------------|---------------------------------------------------------------------------------------------|
| Identification code | 141224-1o                                                                                   |
| Empirical formula   | C <sub>36</sub> H <sub>36</sub> K <sub>2</sub> N <sub>4</sub> O <sub>2</sub> P <sub>2</sub> |
| Formula weight      | 696.83                                                                                      |
| Temperature/K       | 293(2)                                                                                      |
| Crystal system      | triclinic                                                                                   |
| Space group         | P-1                                                                                         |

|                                             |                                                                  |
|---------------------------------------------|------------------------------------------------------------------|
| a/Å                                         | 12.4944(5)                                                       |
| b/Å                                         | 12.9078(6)                                                       |
| c/Å                                         | 13.8901(6)                                                       |
| $\alpha/^\circ$                             | 112.737(4)                                                       |
| $\beta/^\circ$                              | 108.856(4)                                                       |
| $\gamma/^\circ$                             | 101.438(4)                                                       |
| Volume/Å <sup>3</sup>                       | 1816.17(16)                                                      |
| Z                                           | 2                                                                |
| $\rho_{\text{calc}}/\text{cm}^3$            | 1.274                                                            |
| $\mu/\text{mm}^{-1}$                        | 0.385                                                            |
| F(000)                                      | 728.0                                                            |
| Crystal size/mm <sup>3</sup>                | 0.22 × 0.1 × 0.07                                                |
| Radiation                                   | MoK $\alpha$ ( $\lambda = 0.710$ )                               |
| 2 $\theta$ range for data collection/°      | 6.114 to 52.686                                                  |
| Index ranges                                | -15 ≤ h ≤ 14, -16 ≤ k ≤ 16, -17 ≤ l ≤ 17                         |
| Reflections collected                       | 22239                                                            |
| Independent reflections                     | 7433 [ $R_{\text{int}} = 0.0286$ , $R_{\text{sigma}} = 0.0423$ ] |
| Data/restraints/parameters                  | 7433/0/415                                                       |
| Goodness-of-fit on F <sup>2</sup>           | 1.039                                                            |
| Final R indexes [ $ I  \geq 2\sigma(I)$ ]   | $R_1 = 0.0565$ , $wR_2 = 0.1428$                                 |
| Final R indexes [all data]                  | $R_1 = 0.0957$ , $wR_2 = 0.1642$                                 |
| Largest diff. peak/hole / e Å <sup>-3</sup> | 0.32/-0.24                                                       |

**Table 2 Fractional Atomic Coordinates ( $\times 10^4$ ) and Equivalent Isotropic Displacement Parameters ( $\text{\AA}^2 \times 10^3$ ) for 141224-1o.  $U_{\text{eq}}$  is defined as 1/3 of the trace of the orthogonalised  $U_{ij}$  tensor.**

| Ato<br>m | x         | y          | z          | U(eq)     |
|----------|-----------|------------|------------|-----------|
| P2       | 1603.7(8) | 4699.2(8)  | 4673.3(8)  | 68.0(3)   |
| P1       | 8192.8(8) | 10483.6(8) | 10081.7(8) | 72.8(3)   |
| O2       | 2480(3)   | 3637(3)    | 1738(3)    | 113.4(10) |
| C16      | 3538(5)   | 2918(4)    | 7347(4)    | 103.6(14) |
| C17      | 2423(6)   | 2299(4)    | 7181(5)    | 110.6(17) |
| C27      | 3381(4)   | 7551(4)    | 3210(4)    | 94.0(12)  |
| C12      | 6800(5)   | 10582(4)   | 13479(4)   | 91.5(12)  |
| C35      | 1807(7)   | 2929(6)    | -223(5)    | 154(2)    |
| N4       | 3880(2)   | 5868(2)    | 5304(2)    | 52.4(6)   |
| C11      | 7867(4)   | 11064(4)   | 13474(3)   | 92.8(12)  |
| C4       | 9070(4)   | 9834(4)    | 6910(4)    | 90.3(12)  |
| C5       | 8803(3)   | 9812(3)    | 7805(3)    | 75.7(9)   |

|     |           |           |           |           |
|-----|-----------|-----------|-----------|-----------|
| N3  | 3909(2)   | 5205(2)   | 5877(2)   | 53.2(6)   |
| C10 | 7949(3)   | 10801(3)  | 12435(3)  | 77.9(10)  |
| C25 | 1342(4)   | 7068(4)   | 2851(4)   | 94.7(13)  |
| C36 | 2917(5)   | 3608(6)   | 923(6)    | 143(2)    |
| C19 | 1555(4)   | 3141(3)   | 6031(4)   | 84.4(11)  |
| C26 | 2280(5)   | 7614(4)   | 2714(4)   | 92.3(12)  |
| C22 | 2744(2)   | 5708(2)   | 4647(2)   | 51.9(7)   |
| C34 | 840(5)    | 3128(6)   | 97(5)     | 151(2)    |
| N2  | 6065(2)   | 8866(2)   | 9272(2)   | 61.4(6)   |
| C18 | 1424(5)   | 2413(4)   | 6527(5)   | 107.3(15) |
| C3  | 8155(5)   | 9532(4)   | 5868(4)   | 91.1(12)  |
| C23 | 2590(3)   | 6371(3)   | 3982(2)   | 56.0(7)   |
| C6  | 7612(3)   | 9488(2)   | 7647(3)   | 56.5(7)   |
| C2  | 6981(4)   | 9189(3)   | 5692(3)   | 80.8(10)  |
| C28 | 3538(3)   | 6934(3)   | 3843(3)   | 77.1(10)  |
| C24 | 1479(3)   | 6459(3)   | 3482(3)   | 77.8(10)  |
| C9  | 6926(3)   | 10041(3)  | 11373(3)  | 60.7(8)   |
| N1  | 6243(2)   | 8718(2)   | 8322(2)   | 59.8(6)   |
| C8  | 6996(3)   | 9754(2)   | 10260(3)  | 56.6(7)   |
| C1  | 6705(3)   | 9175(3)   | 6573(3)   | 68.9(9)   |
| C13 | 5770(4)   | 9838(3)   | 12438(4)  | 82.4(11)  |
| C21 | 2796(3)   | 4546(3)   | 5638(2)   | 54.5(7)   |
| C20 | 2671(3)   | 3779(3)   | 6185(3)   | 62.1(8)   |
| C15 | 3677(4)   | 3659(3)   | 6859(3)   | 81.5(10)  |
| C7  | 7313(3)   | 9500(2)   | 8599(3)   | 55.5(7)   |
| C33 | 1261(5)   | 3359(7)   | 1252(5)   | 170(3)    |
| C14 | 5840(3)   | 9576(3)   | 11399(3)  | 69.2(9)   |
| K1  | 3796.1(6) | 7514.1(6) | 7450.6(6) | 59.5(2)   |
| O1  | 3015(3)   | 6542(3)   | 8537(3)   | 109.6(10) |
| C32 | 1804(5)   | 6183(5)   | 8361(5)   | 128.3(18) |
| C29 | 3697(5)   | 6292(5)   | 9374(5)   | 124.6(17) |
| C30 | 3043(7)   | 6343(8)   | 10084(6)  | 186(3)    |
| C31 | 1787(7)   | 6040(7)   | 9327(7)   | 185(3)    |
| K2  | 3647.0(6) | 3437.0(6) | 3535.1(6) | 60.4(2)   |

**Table 3 Anisotropic Displacement Parameters ( $\text{\AA}^2 \times 10^3$ ) for 141224-1o. The Anisotropic displacement factor exponent takes the form:  $-2\pi^2[h^2a^2U_{11}+2hka*b*U_{12}+...]$ .**

| Atom | $U_{11}$ | $U_{22}$ | $U_{33}$ | $U_{23}$ | $U_{13}$ | $U_{12}$ |
|------|----------|----------|----------|----------|----------|----------|
|------|----------|----------|----------|----------|----------|----------|



|     |          |          |          |          |          |          |
|-----|----------|----------|----------|----------|----------|----------|
| P2  | 48.3(5)  | 79.6(6)  | 66.2(6)  | 33.1(5)  | 21.0(4)  | 16.7(4)  |
| P1  | 65.6(6)  | 62.8(5)  | 53.8(5)  | 13.4(4)  | 16.0(4)  | 3.6(4)   |
| O2  | 111(2)   | 143(3)   | 76(2)    | 49(2)    | 26.0(19) | 63(2)    |
| C16 | 146(4)   | 98(3)    | 90(3)    | 57(3)    | 56(3)    | 59(3)    |
| C17 | 195(6)   | 79(3)    | 104(4)   | 53(3)    | 102(4)   | 60(4)    |
| C27 | 103(3)   | 100(3)   | 85(3)    | 60(3)    | 35(3)    | 27(3)    |
| C12 | 146(4)   | 83(3)    | 63(3)    | 39(2)    | 52(3)    | 57(3)    |
| C35 | 197(7)   | 178(6)   | 100(5)   | 58(4)    | 87(5)    | 80(5)    |
| N4  | 49.4(14) | 53.7(14) | 43.3(14) | 17.5(12) | 16.4(11) | 18.1(11) |
| C11 | 105(3)   | 102(3)   | 53(2)    | 28(2)    | 20(2)    | 46(3)    |
| C4  | 88(3)    | 96(3)    | 109(4)   | 51(3)    | 65(3)    | 41(2)    |
| C5  | 73(2)    | 80(2)    | 76(2)    | 37(2)    | 34(2)    | 30.8(19) |
| N3  | 50.9(14) | 53.6(14) | 47.0(14) | 19.5(12) | 18.3(12) | 20.0(11) |
| C10 | 79(2)    | 87(3)    | 53(2)    | 25.3(19) | 19.6(19) | 34(2)    |
| C25 | 98(3)    | 99(3)    | 86(3)    | 50(3)    | 23(3)    | 56(3)    |
| C36 | 113(4)   | 179(6)   | 182(7)   | 130(6)   | 63(5)    | 58(4)    |
| C19 | 92(3)    | 83(3)    | 91(3)    | 43(2)    | 56(2)    | 30(2)    |
| C26 | 120(4)   | 79(3)    | 72(3)    | 42(2)    | 27(3)    | 42(3)    |
| C22 | 50.4(17) | 49.9(16) | 38.9(16) | 10.0(13) | 16.8(13) | 16.2(13) |
| C34 | 131(5)   | 189(6)   | 82(4)    | 48(4)    | 22(4)    | 42(4)    |
| N2  | 62.8(16) | 57.8(15) | 48.2(15) | 20.2(13) | 19.2(13) | 13.3(12) |
| C18 | 145(4)   | 88(3)    | 134(4)   | 62(3)    | 100(4)   | 46(3)    |
| C3  | 128(4)   | 86(3)    | 77(3)    | 38(2)    | 64(3)    | 47(3)    |
| C23 | 58.0(18) | 53.1(17) | 39.6(16) | 12.9(14) | 14.9(14) | 19.1(14) |
| C6  | 63.6(19) | 42.3(15) | 56.4(19) | 19.6(14) | 23.9(16) | 19.4(14) |
| C2  | 100(3)   | 74(2)    | 60(2)    | 30.2(19) | 33(2)    | 25(2)    |
| C28 | 70(2)    | 91(3)    | 67(2)    | 43(2)    | 23.6(19) | 27(2)    |
| C24 | 71(2)    | 85(2)    | 72(2)    | 37(2)    | 23.7(19) | 35(2)    |
| C9  | 75(2)    | 51.3(17) | 50.9(19) | 23.2(15) | 20.6(17) | 29.9(16) |
| N1  | 60.0(15) | 54.7(14) | 44.4(15) | 15.3(12) | 17.3(12) | 10.6(12) |
| C8  | 65.9(19) | 45.4(16) | 50.6(18) | 20.7(14) | 18.6(15) | 22.8(14) |
| C1  | 76(2)    | 59.2(19) | 62(2)    | 25.3(17) | 26.1(19) | 21.0(17) |
| C13 | 121(3)   | 65(2)    | 80(3)    | 39(2)    | 59(3)    | 39(2)    |
| C21 | 56.4(18) | 51.4(16) | 45.1(17) | 13.1(14) | 24.7(14) | 17.2(14) |
| C20 | 76(2)    | 53.4(17) | 54.1(19) | 18.7(15) | 35.2(18) | 22.9(16) |
| C15 | 95(3)    | 78(2)    | 74(3)    | 41(2)    | 37(2)    | 31(2)    |
| C7  | 57.1(18) | 45.7(16) | 52.4(18) | 18.9(14) | 18.6(15) | 17.2(14) |
| C33 | 102(4)   | 292(9)   | 79(4)    | 71(5)    | 18(3)    | 75(5)    |
| C14 | 91(3)    | 50.0(18) | 61(2)    | 23.8(16) | 32.9(19) | 23.5(17) |
| K1  | 60.3(4)  | 54.4(4)  | 52.5(4)  | 18.3(3)  | 24.5(3)  | 16.4(3)  |

|     |         |         |         |         |         |         |
|-----|---------|---------|---------|---------|---------|---------|
| O1  | 107(2)  | 129(3)  | 108(2)  | 72(2)   | 55(2)   | 29(2)   |
| C32 | 112(4)  | 120(4)  | 147(5)  | 60(4)   | 61(4)   | 34(3)   |
| C29 | 124(4)  | 109(4)  | 109(4)  | 41(3)   | 37(4)   | 33(3)   |
| C30 | 185(7)  | 269(9)  | 143(6)  | 133(6)  | 88(6)   | 62(7)   |
| C31 | 151(6)  | 257(9)  | 213(8)  | 156(7)  | 115(6)  | 56(6)   |
| K2  | 52.1(4) | 54.4(4) | 54.9(4) | 13.9(3) | 18.0(3) | 17.7(3) |

**Table 4 Bond Lengths for 141224-1o.**

| Ato<br>m | Ato<br>m        | Length/Å   | Ato<br>m | Ato<br>m         | Length/Å |
|----------|-----------------|------------|----------|------------------|----------|
| P2       | C22             | 1.749(3)   | N2       | N1               | 1.356(3) |
| P2       | C21             | 1.757(3)   | N2       | C8               | 1.332(4) |
| P2       | K1              | 3.7382(12) | N2       | K1               | 2.733(3) |
| P2       | K2              | 3.7335(11) | C3       | C2               | 1.355(5) |
| P1       | C8              | 1.745(3)   | C23      | C28              | 1.372(4) |
| P1       | C7              | 1.739(3)   | C23      | C24              | 1.386(4) |
| O2       | C36             | 1.399(6)   | C6       | C1               | 1.390(4) |
| O2       | C33             | 1.355(5)   | C6       | C7               | 1.481(4) |
| O2       | K2              | 2.591(3)   | C6       | K2 <sup>2</sup>  | 3.257(3) |
| C16      | C17             | 1.356(6)   | C2       | C1               | 1.380(5) |
| C16      | C15             | 1.385(5)   | C9       | C8               | 1.480(4) |
| C17      | C18             | 1.360(7)   | C9       | C14              | 1.389(5) |
| C27      | C26             | 1.359(6)   | C9       | K1 <sup>1</sup>  | 3.397(3) |
| C27      | C28             | 1.392(5)   | N1       | C7               | 1.337(4) |
| C12      | C11             | 1.359(6)   | N1       | K1               | 2.738(3) |
| C12      | C13             | 1.380(6)   | N1       | K2 <sup>2</sup>  | 3.040(2) |
| C12      | K1 <sup>1</sup> | 3.289(4)   | C1       | K2 <sup>2</sup>  | 3.249(3) |
| C35      | C36             | 1.496(7)   | C13      | C14              | 1.385(5) |
| C35      | C34             | 1.451(7)   | C13      | K1 <sup>1</sup>  | 3.286(3) |
| N4       | N3              | 1.374(3)   | C21      | C20              | 1.476(4) |
| N4       | C22             | 1.339(3)   | C21      | K1               | 3.345(3) |
| N4       | K1              | 2.968(2)   | C21      | K2               | 3.331(3) |
| N4       | K2 <sup>2</sup> | 2.741(2)   | C20      | C15              | 1.381(5) |
| N4       | K2              | 3.030(2)   | C7       | K2 <sup>2</sup>  | 3.436(3) |
| C11      | C10             | 1.392(5)   | C33      | K2               | 3.532(5) |
| C11      | K1 <sup>1</sup> | 3.309(4)   | C14      | K1 <sup>1</sup>  | 3.329(3) |
| C4       | C5              | 1.397(5)   | K1       | C12 <sup>1</sup> | 3.289(4) |
| C4       | C3              | 1.367(6)   | K1       | C11 <sup>1</sup> | 3.309(4) |
| C5       | C6              | 1.381(4)   | K1       | C10 <sup>1</sup> | 3.369(4) |

|     |                 |          |     |                  |          |
|-----|-----------------|----------|-----|------------------|----------|
| N3  | C21             | 1.335(3) | K1  | C13 <sup>1</sup> | 3.286(3) |
| N3  | K1              | 3.002(2) | K1  | C14 <sup>1</sup> | 3.329(3) |
| N3  | K2 <sup>2</sup> | 2.867(2) | K1  | O1               | 2.596(3) |
| N3  | K2              | 3.029(2) | O1  | C32              | 1.399(5) |
| C10 | C9              | 1.392(5) | O1  | C29              | 1.393(6) |
| C10 | K1 <sup>1</sup> | 3.369(4) | C32 | C31              | 1.429(7) |
| C25 | C26             | 1.352(6) | C29 | C30              | 1.462(7) |
| C25 | C24             | 1.379(5) | C30 | C31              | 1.447(8) |
| C19 | C18             | 1.377(6) | K2  | N4 <sup>2</sup>  | 2.741(2) |
| C19 | C20             | 1.373(5) | K2  | N3 <sup>2</sup>  | 2.867(2) |
| C22 | C23             | 1.479(4) | K2  | C6 <sup>2</sup>  | 3.257(3) |
| C22 | K1              | 3.284(3) | K2  | N1 <sup>2</sup>  | 3.040(2) |
| C22 | K2              | 3.345(3) | K2  | C1 <sup>2</sup>  | 3.249(3) |
| C34 | C33             | 1.401(7) | K2  | C7 <sup>2</sup>  | 3.436(3) |

<sup>1</sup>1-X,2-Y,2-Z; <sup>2</sup>1-X,1-Y,1-Z

**Table 5 Bond Angles for 141224-1o.**

| Ato<br>m | Ato<br>m | Ato<br>m        | Angle/°   | Ato<br>m         | Ato<br>m | Ato<br>m         | Angle/°   |
|----------|----------|-----------------|-----------|------------------|----------|------------------|-----------|
| C22      | P2       | C21             | 86.07(14) | N4               | K1       | C22              | 24.05(6)  |
| C22      | P2       | K1              | 61.44(9)  | N4               | K1       | C13 <sup>1</sup> | 107.47(8) |
| C22      | P2       | K2              | 63.60(9)  | N4               | K1       | C21              | 41.22(7)  |
| C21      | P2       | K1              | 63.44(9)  | N4               | K1       | C14 <sup>1</sup> | 131.60(8) |
| C21      | P2       | K2              | 63.11(9)  | C11 <sup>1</sup> | K1       | C10 <sup>1</sup> | 24.04(9)  |
| K2       | P2       | K1              | 102.89(2) | C11 <sup>1</sup> | K1       | C21              | 114.85(9) |
| C7       | P1       | C8              | 86.00(15) | C11 <sup>1</sup> | K1       | C14 <sup>1</sup> | 48.69(10) |
| C36      | O2       | K2              | 122.9(3)  | N3               | K1       | C12 <sup>1</sup> | 120.39(9) |
| C33      | O2       | C36             | 109.4(4)  | N3               | K1       | C11 <sup>1</sup> | 124.15(9) |
| C33      | O2       | K2              | 124.0(4)  | N3               | K1       | C10 <sup>1</sup> | 142.43(8) |
| C17      | C16      | C15             | 121.2(5)  | N3               | K1       | C22              | 41.75(7)  |
| C16      | C17      | C18             | 119.4(4)  | N3               | K1       | C13 <sup>1</sup> | 133.43(8) |
| C26      | C27      | C28             | 120.7(4)  | N3               | K1       | C21              | 23.50(6)  |
| C11      | C12      | C13             | 119.6(4)  | N3               | K1       | C14 <sup>1</sup> | 156.98(8) |
| C11      | C12      | K1 <sup>1</sup> | 78.9(2)   | C22              | K1       | C12 <sup>1</sup> | 81.35(9)  |
| C13      | C12      | K1 <sup>1</sup> | 77.8(2)   | C22              | K1       | C11 <sup>1</sup> | 82.51(9)  |
| C34      | C35      | C36             | 103.0(5)  | C22              | K1       | C10 <sup>1</sup> | 103.18(8) |
| N3       | N4       | K1              | 78.07(14) | C22              | K1       | C13 <sup>1</sup> | 101.28(9) |
| N3       | N4       | K2 <sup>2</sup> | 80.99(14) | C22              | K1       | C21              | 42.31(7)  |

|                 |     |                 |            |                  |    |                  |            |
|-----------------|-----|-----------------|------------|------------------|----|------------------|------------|
| N3              | N4  | K2              | 76.84(14)  | C22              | K1 | C14 <sup>1</sup> | 123.56(8)  |
| C22             | N4  | N3              | 112.5(2)   | N2               | K1 | C12 <sup>1</sup> | 102.54(11) |
| C22             | N4  | K1              | 91.30(16)  | N2               | K1 | N4               | 112.15(7)  |
| C22             | N4  | K2              | 91.54(16)  | N2               | K1 | C11 <sup>1</sup> | 118.41(10) |
| C22             | N4  | K2 <sup>2</sup> | 166.5(2)   | N2               | K1 | N3               | 107.20(7)  |
| K1              | N4  | K2              | 153.86(9)  | N2               | K1 | C10 <sup>1</sup> | 109.33(8)  |
| K2 <sup>2</sup> | N4  | K1              | 91.23(7)   | N2               | K1 | C22              | 134.86(7)  |
| K2 <sup>2</sup> | N4  | K2              | 92.01(7)   | N2               | K1 | N1               | 28.69(7)   |
| C12             | C11 | C10             | 121.2(4)   | N2               | K1 | C13 <sup>1</sup> | 78.74(10)  |
| C12             | C11 | K1 <sup>1</sup> | 77.3(2)    | N2               | K1 | C21              | 124.96(8)  |
| C10             | C11 | K1 <sup>1</sup> | 80.4(2)    | N2               | K1 | C14 <sup>1</sup> | 70.53(9)   |
| C3              | C4  | C5              | 120.4(4)   | N1               | K1 | C12 <sup>1</sup> | 90.55(11)  |
| C6              | C5  | C4              | 120.2(4)   | N1               | K1 | N4               | 87.48(7)   |
| N4              | N3  | K1              | 75.33(14)  | N1               | K1 | C11 <sup>1</sup> | 112.96(11) |
| N4              | N3  | K2 <sup>2</sup> | 70.77(14)  | N1               | K1 | N3               | 91.88(7)   |
| N4              | N3  | K2              | 76.95(14)  | N1               | K1 | C10 <sup>1</sup> | 116.78(9)  |
| C21             | N3  | N4              | 112.3(2)   | N1               | K1 | C22              | 107.78(7)  |
| C21             | N3  | K1              | 92.81(16)  | N1               | K1 | C13 <sup>1</sup> | 71.46(10)  |
| C21             | N3  | K2              | 90.96(16)  | N1               | K1 | C21              | 114.74(7)  |
| C21             | N3  | K2 <sup>2</sup> | 176.9(2)   | N1               | K1 | C14 <sup>1</sup> | 75.57(8)   |
| K1              | N3  | K2              | 151.33(9)  | C13 <sup>1</sup> | K1 | C12 <sup>1</sup> | 24.22(10)  |
| K2 <sup>2</sup> | N3  | K1              | 88.13(7)   | C13 <sup>1</sup> | K1 | C11 <sup>1</sup> | 42.06(11)  |
| K2 <sup>2</sup> | N3  | K2              | 89.61(6)   | C13 <sup>1</sup> | K1 | C10 <sup>1</sup> | 49.00(10)  |
| C11             | C10 | K1 <sup>1</sup> | 75.6(2)    | C13 <sup>1</sup> | K1 | C21              | 143.57(9)  |
| C9              | C10 | C11             | 120.3(4)   | C13 <sup>1</sup> | K1 | C14 <sup>1</sup> | 24.17(8)   |
| C9              | C10 | K1 <sup>1</sup> | 79.27(19)  | C21              | K1 | C10 <sup>1</sup> | 125.13(8)  |
| C26             | C25 | C24             | 121.6(4)   | C14 <sup>1</sup> | K1 | C10 <sup>1</sup> | 41.58(9)   |
| O2              | C36 | C35             | 104.7(4)   | C14 <sup>1</sup> | K1 | C21              | 163.36(9)  |
| C20             | C19 | C18             | 122.3(4)   | O1               | K1 | C12 <sup>1</sup> | 135.79(12) |
| C25             | C26 | C27             | 118.6(4)   | O1               | K1 | N4               | 117.19(9)  |
| P2              | C22 | K1              | 90.66(11)  | O1               | K1 | C11 <sup>1</sup> | 113.75(12) |
| P2              | C22 | K2              | 88.47(11)  | O1               | K1 | N3               | 92.35(9)   |
| N4              | C22 | P2              | 114.6(2)   | O1               | K1 | C10 <sup>1</sup> | 93.68(10)  |
| N4              | C22 | C23             | 117.7(3)   | O1               | K1 | C22              | 114.71(9)  |
| N4              | C22 | K1              | 64.64(14)  | O1               | K1 | N2               | 93.82(10)  |
| N4              | C22 | K2              | 64.88(14)  | O1               | K1 | N1               | 119.29(10) |
| C23             | C22 | P2              | 127.7(2)   | O1               | K1 | C13 <sup>1</sup> | 133.96(10) |
| C23             | C22 | K1              | 111.91(17) | O1               | K1 | C21              | 76.66(9)   |
| C23             | C22 | K2              | 112.54(17) | O1               | K1 | C14 <sup>1</sup> | 110.59(10) |
| K1              | C22 | K2              | 123.62(9)  | C32              | O1 | K1               | 124.1(3)   |

|     |     |                 |            |                 |     |                 |            |
|-----|-----|-----------------|------------|-----------------|-----|-----------------|------------|
| C33 | C34 | C35             | 105.4(5)   | C29             | O1  | K1              | 127.1(3)   |
| N1  | N2  | K1              | 75.84(15)  | C29             | O1  | C32             | 108.9(4)   |
| C8  | N2  | N1              | 112.7(2)   | O1              | C32 | C31             | 107.7(5)   |
| C8  | N2  | K1              | 162.3(2)   | O1              | C29 | C30             | 104.0(5)   |
| C17 | C18 | C19             | 119.6(5)   | C31             | C30 | C29             | 105.7(6)   |
| C2  | C3  | C4              | 120.1(4)   | C32             | C31 | C30             | 105.8(5)   |
| C28 | C23 | C22             | 121.6(3)   | O2              | K2  | N4              | 94.98(9)   |
| C28 | C23 | C24             | 117.3(3)   | O2              | K2  | N4 <sup>2</sup> | 126.63(10) |
| C24 | C23 | C22             | 121.1(3)   | O2              | K2  | N3              | 118.06(9)  |
| C5  | C6  | C1              | 117.8(3)   | O2              | K2  | N3 <sup>2</sup> | 99.52(10)  |
| C5  | C6  | C7              | 121.1(3)   | O2              | K2  | C22             | 77.06(9)   |
| C5  | C6  | K2 <sup>2</sup> | 110.1(2)   | O2              | K2  | C6 <sup>2</sup> | 97.58(10)  |
| C1  | C6  | C7              | 121.0(3)   | O2              | K2  | N1 <sup>2</sup> | 81.40(9)   |
| C1  | C6  | K2 <sup>2</sup> | 77.35(18)  | O2              | K2  | C1 <sup>2</sup> | 122.04(10) |
| C7  | C6  | K2 <sup>2</sup> | 84.10(16)  | O2              | K2  | C21             | 112.45(9)  |
| C3  | C2  | C1              | 120.2(4)   | O2              | K2  | C7 <sup>2</sup> | 80.90(9)   |
| C23 | C28 | C27             | 121.1(4)   | O2              | K2  | C33             | 18.56(13)  |
| C25 | C24 | C23             | 120.6(4)   | N4 <sup>2</sup> | K2  | N4              | 87.99(7)   |
| C10 | C9  | C8              | 121.0(3)   | N4 <sup>2</sup> | K2  | N3 <sup>2</sup> | 28.24(7)   |
| C10 | C9  | K1 <sup>1</sup> | 76.99(19)  | N4 <sup>2</sup> | K2  | N3              | 83.91(7)   |
| C8  | C9  | K1 <sup>1</sup> | 116.86(18) | N4 <sup>2</sup> | K2  | C22             | 110.94(7)  |
| C14 | C9  | C10             | 117.5(3)   | N4              | K2  | C22             | 23.58(6)   |
| C14 | C9  | C8              | 121.5(3)   | N4              | K2  | C6 <sup>2</sup> | 145.79(7)  |
| C14 | C9  | K1 <sup>1</sup> | 75.32(17)  | N4 <sup>2</sup> | K2  | C6 <sup>2</sup> | 109.11(8)  |
| N2  | N1  | K1              | 75.47(15)  | N4              | K2  | N1 <sup>2</sup> | 169.10(7)  |
| N2  | N1  | K2 <sup>2</sup> | 131.44(18) | N4 <sup>2</sup> | K2  | N1 <sup>2</sup> | 86.00(7)   |
| C7  | N1  | N2              | 112.3(2)   | N4 <sup>2</sup> | K2  | C1 <sup>2</sup> | 89.69(8)   |
| C7  | N1  | K1              | 162.6(2)   | N4              | K2  | C1 <sup>2</sup> | 134.16(8)  |
| C7  | N1  | K2 <sup>2</sup> | 95.50(17)  | N4              | K2  | C21             | 41.09(7)   |
| K1  | N1  | K2 <sup>2</sup> | 89.76(7)   | N4 <sup>2</sup> | K2  | C21             | 104.24(7)  |
| N2  | C8  | P1              | 114.4(2)   | N4              | K2  | C7 <sup>2</sup> | 166.75(7)  |
| N2  | C8  | C9              | 119.0(3)   | N4 <sup>2</sup> | K2  | C7 <sup>2</sup> | 104.61(7)  |
| C9  | C8  | P1              | 126.6(2)   | N4              | K2  | C33             | 92.72(13)  |
| C6  | C1  | K2 <sup>2</sup> | 77.97(18)  | N4 <sup>2</sup> | K2  | C33             | 145.09(13) |
| C2  | C1  | C6              | 121.3(3)   | N3 <sup>2</sup> | K2  | N4              | 81.81(6)   |
| C2  | C1  | K2 <sup>2</sup> | 110.2(2)   | N3              | K2  | N4              | 26.21(6)   |
| C12 | C13 | C14             | 119.7(4)   | N3 <sup>2</sup> | K2  | N3              | 90.39(7)   |
| C12 | C13 | K1 <sup>1</sup> | 78.0(2)    | N3              | K2  | C22             | 41.06(7)   |
| C14 | C13 | K1 <sup>1</sup> | 79.63(19)  | N3 <sup>2</sup> | K2  | C22             | 99.77(7)   |
| P2  | C21 | K1              | 88.54(11)  | N3 <sup>2</sup> | K2  | C6 <sup>2</sup> | 126.77(7)  |

|                  |     |                  |            |                 |    |                 |            |
|------------------|-----|------------------|------------|-----------------|----|-----------------|------------|
| P2               | C21 | K2               | 88.83(11)  | N3              | K2 | C6 <sup>2</sup> | 123.84(7)  |
| N3               | C21 | P2               | 114.6(2)   | N3              | K2 | N1 <sup>2</sup> | 160.38(7)  |
| N3               | C21 | C20              | 119.0(3)   | N3 <sup>2</sup> | K2 | N1 <sup>2</sup> | 88.63(7)   |
| N3               | C21 | K1               | 63.69(14)  | N3              | K2 | C1 <sup>2</sup> | 108.11(8)  |
| N3               | C21 | K2               | 65.41(14)  | N3 <sup>2</sup> | K2 | C1 <sup>2</sup> | 113.75(8)  |
| C20              | C21 | P2               | 126.4(2)   | N3              | K2 | C21             | 23.63(6)   |
| C20              | C21 | K1               | 114.61(18) | N3 <sup>2</sup> | K2 | C21             | 113.99(7)  |
| C20              | C21 | K2               | 112.82(18) | N3 <sup>2</sup> | K2 | C7 <sup>2</sup> | 111.24(7)  |
| K2               | C21 | K1               | 122.16(9)  | N3              | K2 | C7 <sup>2</sup> | 149.22(7)  |
| C19              | C20 | C21              | 121.7(3)   | N3              | K2 | C33             | 110.65(12) |
| C19              | C20 | C15              | 117.2(3)   | N3 <sup>2</sup> | K2 | C33             | 117.49(13) |
| C15              | C20 | C21              | 121.1(3)   | C22             | K2 | C7 <sup>2</sup> | 144.42(7)  |
| C20              | C15 | C16              | 120.2(4)   | C22             | K2 | C33             | 70.91(12)  |
| P1               | C7  | K2 <sup>2</sup>  | 143.18(14) | C6 <sup>2</sup> | K2 | C22             | 133.19(7)  |
| C6               | C7  | P1               | 126.7(2)   | C6 <sup>2</sup> | K2 | C21             | 104.89(8)  |
| C6               | C7  | K2 <sup>2</sup>  | 70.51(15)  | C6 <sup>2</sup> | K2 | C7 <sup>2</sup> | 25.38(7)   |
| N1               | C7  | P1               | 114.6(2)   | C6 <sup>2</sup> | K2 | C33             | 89.35(14)  |
| N1               | C7  | C6               | 118.6(3)   | N1 <sup>2</sup> | K2 | C22             | 157.88(7)  |
| N1               | C7  | K2 <sup>2</sup>  | 61.72(15)  | N1 <sup>2</sup> | K2 | C6 <sup>2</sup> | 45.11(7)   |
| O2               | C33 | C34              | 110.3(5)   | N1 <sup>2</sup> | K2 | C1 <sup>2</sup> | 54.97(8)   |
| O2               | C33 | K2               | 37.5(2)    | N1 <sup>2</sup> | K2 | C21             | 149.64(7)  |
| C34              | C33 | K2               | 143.7(4)   | N1 <sup>2</sup> | K2 | C7 <sup>2</sup> | 22.78(6)   |
| C9               | C14 | K1 <sup>1</sup>  | 80.86(17)  | N1 <sup>2</sup> | K2 | C33             | 87.04(12)  |
| C13              | C14 | C9               | 121.7(4)   | C1 <sup>2</sup> | K2 | C22             | 135.61(8)  |
| C13              | C14 | K1 <sup>1</sup>  | 76.20(19)  | C1 <sup>2</sup> | K2 | C6 <sup>2</sup> | 24.68(8)   |
| C12 <sup>1</sup> | K1  | C11 <sup>1</sup> | 23.77(10)  | C1 <sup>2</sup> | K2 | C21             | 95.99(8)   |
| C12 <sup>1</sup> | K1  | C10 <sup>1</sup> | 42.17(10)  | C1 <sup>2</sup> | K2 | C7 <sup>2</sup> | 43.80(8)   |
| C12 <sup>1</sup> | K1  | C21              | 122.05(10) | C1 <sup>2</sup> | K2 | C33             | 113.66(15) |
| C12 <sup>1</sup> | K1  | C14 <sup>1</sup> | 42.34(9)   | C21             | K2 | C22             | 42.00(7)   |
| N4               | K1  | C12 <sup>1</sup> | 94.21(9)   | C21             | K2 | C7 <sup>2</sup> | 129.21(7)  |
| N4               | K1  | C11 <sup>1</sup> | 102.36(9)  | C21             | K2 | C33             | 98.90(11)  |
| N4               | K1  | N3               | 26.60(6)   | C7 <sup>2</sup> | K2 | C33             | 79.34(13)  |
| N4               | K1  | C10 <sup>1</sup> | 125.16(8)  |                 |    |                 |            |

<sup>1</sup>1-X,2-Y,2-Z; <sup>2</sup>1-X,1-Y,1-Z

**Table 6 Torsion Angles for 141224-1o.**

| A  | B   | C   | D   | Angle/°   | A   | B  | C   | D   | Angle/°  |
|----|-----|-----|-----|-----------|-----|----|-----|-----|----------|
| P2 | C22 | C23 | C28 | -166.0(3) | C21 | P2 | C22 | C23 | 179.5(3) |

|                             |            |                             |             |
|-----------------------------|------------|-----------------------------|-------------|
| P2 C22 C23 C24              | 14.7(4)    | C21 P2 C22 K1               | -61.78(10)  |
| P2 C21 C20 C19              | -4.2(4)    | C21 P2 C22 K2               | 61.84(10)   |
| P2 C21 C20 C15              | 174.8(3)   | C21 C20 C15 C16             | -178.9(3)   |
| C16 C17 C18 C19             | 0.9(7)     | C20 C19 C18 C17             | -1.0(7)     |
| C17 C16 C15 C20             | -0.1(6)    | C15 C16 C17 C18             | -0.4(7)     |
| C12 C11 C10 C9              | 0.6(6)     | C7 P1 C8 N2                 | 0.5(2)      |
| C12 C11 C10 K1 <sup>1</sup> | 68.7(4)    | C7 P1 C8 C9                 | -178.7(3)   |
| C12 C13 C14 C9              | 0.2(5)     | C7 C6 C1 C2                 | 178.5(3)    |
| C12 C13 C14 K1 <sup>1</sup> | -69.7(3)   | C7 C6 C1 K2 <sup>2</sup>    | -75.1(2)    |
| C35 C34 C33 O2              | 16.4(8)    | C33 O2 C36 C35              | -16.5(7)    |
| C35 C34 C33 K2              | -5.9(11)   | C14 C9 C8 P1                | 166.6(2)    |
| N4 N3 C21 P2                | -0.2(3)    | C14 C9 C8 N2                | -12.5(4)    |
| N4 N3 C21 C20               | 179.8(2)   | K1 P2 C22 N4                | 62.25(18)   |
| N4 N3 C21 K1                | -75.30(18) | K1 P2 C22 C23               | -118.7(3)   |
| N4 N3 C21 K2                | 76.28(19)  | K1 P2 C22 K2                | 123.62(9)   |
| N4 C22 C23 C28              | 13.0(4)    | K1 P2 C21 N3                | -60.06(19)  |
| N4 C22 C23 C24              | -166.3(3)  | K1 P2 C21 C20               | 119.9(3)    |
| C11 C12 C13 C14             | 1.0(6)     | K1 P2 C21 K2                | -122.22(9)  |
| C11 C12 C13 K1 <sup>1</sup> | -69.6(4)   | K1 <sup>1</sup> C12 C11 C10 | -70.3(4)    |
| C11 C10 C9 C8               | 179.8(3)   | K1 <sup>1</sup> C12 C13 C14 | 70.6(3)     |
| C11 C10 C9 C14              | 0.5(5)     | K1 N4 N3 C21                | 87.0(2)     |
| C11 C10 C9 K1 <sup>1</sup>  | 66.1(3)    | K1 N4 N3 K2 <sup>2</sup>    | -93.19(5)   |
| C4 C5 C6 C1                 | 0.9(5)     | K1 N4 N3 K2                 | 172.60(6)   |
| C4 C5 C6 C7                 | -177.8(3)  | K1 N4 C22 P2                | -78.30(17)  |
| C4 C5 C6 K2 <sup>2</sup>    | 86.9(3)    | K1 N4 C22 C23               | 102.6(2)    |
| C4 C3 C2 C1                 | 1.8(6)     | K1 N4 C22 K2                | -154.01(10) |
| C5 C4 C3 C2                 | -1.1(6)    | K1 <sup>1</sup> C11 C10 C9  | -68.1(3)    |
| C5 C6 C1 C2                 | -0.2(5)    | K1 N3 C21 P2                | 75.10(17)   |
| C5 C6 C1 K2 <sup>2</sup>    | 106.3(3)   | K1 N3 C21 C20               | -104.9(2)   |
| C5 C6 C7 P1                 | 32.7(4)    | K1 N3 C21 K2                | 151.57(10)  |
| C5 C6 C7 N1                 | -150.1(3)  | K1 <sup>1</sup> C10 C9 C8   | 113.7(3)    |
| C5 C6 C7 K2 <sup>2</sup>    | -110.0(3)  | K1 <sup>1</sup> C10 C9 C14  | -65.6(3)    |
| N3 N4 C22 P2                | -0.7(3)    | K1 C22 C23 C28              | 84.9(3)     |
| N3 N4 C22 C23               | -179.8(2)  | K1 C22 C23 C24              | -94.4(3)    |
| N3 N4 C22 K1                | 77.62(18)  | K1 N2 N1 C7                 | 163.5(2)    |
| N3 N4 C22 K2                | -76.39(18) | K1 N2 N1 K2 <sup>2</sup>    | -76.44(19)  |
| N3 C21 C20 C19              | 175.8(3)   | K1 N2 C8 P1                 | -116.2(6)   |
| N3 C21 C20 C15              | -5.2(4)    | K1 N2 C8 C9                 | 63.1(8)     |
| C10 C9 C8 P1                | -12.7(4)   | K1 <sup>1</sup> C9 C8 P1    | 77.9(3)     |
| C10 C9 C8 N2                | 168.2(3)   | K1 <sup>1</sup> C9 C8 N2    | -101.2(3)   |

|                            |            |                            |             |
|----------------------------|------------|----------------------------|-------------|
| C10 C9 C14 C13             | -0.9(5)    | K1 <sup>1</sup> C9 C14 C13 | -67.4(3)    |
| C10 C9 C14 K1 <sup>1</sup> | 66.5(3)    | K1 N1 C7 P1                | 114.1(6)    |
| C36 O2 C33 C34             | 0.4(8)     | K1 N1 C7 C6                | -63.5(7)    |
| C36 O2 C33 K2              | 158.7(6)   | K1 N1 C7 K2 <sup>2</sup>   | -107.0(7)   |
| C36 C35 C34 C33            | -25.3(8)   | K1 <sup>1</sup> C13 C14 C9 | 69.9(3)     |
| C19 C20 C15 C16            | 0.1(5)     | K1 C21 C20 C19             | 103.5(3)    |
| C26 C27 C28 C23            | 0.1(6)     | K1 C21 C20 C15             | -77.6(3)    |
| C26 C25 C24 C23            | -1.1(6)    | K1 O1 C32 C31              | -162.8(4)   |
| C22 P2 C21 N3              | -0.1(2)    | K1 O1 C29 C30              | 152.7(4)    |
| C22 P2 C21 C20             | 179.9(3)   | O1 C32 C31 C30             | 0.6(8)      |
| C22 P2 C21 K1              | 59.91(10)  | O1 C29 C30 C31             | 27.0(8)     |
| C22 P2 C21 K2              | -62.30(10) | C32 O1 C29 C30             | -27.3(6)    |
| C22 N4 N3 C21              | 0.6(3)     | C29 O1 C32 C31             | 17.1(7)     |
| C22 N4 N3 K1               | -86.4(2)   | C29 C30 C31 C32            | -16.9(9)    |
| C22 N4 N3 K2 <sup>2</sup>  | -179.6(2)  | K2 P2 C22 N4               | -61.37(18)  |
| C22 N4 N3 K2               | 86.2(2)    | K2 P2 C22 C23              | 117.7(3)    |
| C22 C23 C28 C27            | 179.7(3)   | K2 P2 C22 K1               | -123.62(9)  |
| C22 C23 C24 C25            | -179.2(3)  | K2 P2 C21 N3               | 62.16(18)   |
| C34 C35 C36 O2             | 25.5(7)    | K2 P2 C21 C20              | -117.8(3)   |
| N2 N1 C7 P1                | 0.4(3)     | K2 P2 C21 K1               | 122.22(9)   |
| N2 N1 C7 C6                | -177.1(2)  | K2 O2 C36 C35              | 142.5(4)    |
| N2 N1 C7 K2 <sup>2</sup>   | 139.3(2)   | K2 O2 C33 C34              | -158.3(4)   |
| C18 C19 C20 C21            | 179.4(3)   | K2 N4 N3 C21               | -85.6(2)    |
| C18 C19 C20 C15            | 0.5(5)     | K2 <sup>2</sup> N4 N3 C21  | -179.8(2)   |
| C3 C4 C5 C6                | -0.3(6)    | K2 N4 N3 K1                | -172.60(6)  |
| C3 C2 C1 C6                | -1.1(5)    | K2 <sup>2</sup> N4 N3 K1   | 93.19(5)    |
| C3 C2 C1 K2 <sup>2</sup>   | -89.1(4)   | K2 N4 N3 K2 <sup>2</sup>   | 94.21(5)    |
| C28 C27 C26 C25            | 0.2(7)     | K2 <sup>2</sup> N4 N3 K2   | -94.21(5)   |
| C28 C23 C24 C25            | 1.4(5)     | K2 <sup>2</sup> N4 C22 P2  | -179.1(7)   |
| C24 C25 C26 C27            | 0.3(7)     | K2 N4 C22 P2               | 75.71(17)   |
| C24 C23 C28 C27            | -0.9(5)    | K2 N4 C22 C23              | -103.4(2)   |
| N1 N2 C8 P1                | -0.3(3)    | K2 <sup>2</sup> N4 C22 C23 | 1.8(9)      |
| N1 N2 C8 C9                | 178.9(2)   | K2 N4 C22 K1               | 154.01(10)  |
| C8 P1 C7 C6                | 176.8(3)   | K2 <sup>2</sup> N4 C22 K1  | -100.8(8)   |
| C8 P1 C7 N1                | -0.5(2)    | K2 <sup>2</sup> N4 C22 K2  | 105.2(8)    |
| C8 P1 C7 K2 <sup>2</sup>   | -75.6(2)   | K2 N3 C21 P2               | -76.47(17)  |
| C8 N2 N1 C7                | 0.0(4)     | K2 N3 C21 C20              | 103.5(2)    |
| C8 N2 N1 K1                | -163.6(2)  | K2 N3 C21 K1               | -151.57(10) |
| C8 N2 N1 K2 <sup>2</sup>   | 120.0(2)   | K2 C22 C23 C28             | -59.5(3)    |
| C8 C9 C14 C13              | 179.8(3)   | K2 C22 C23 C24             | 121.2(3)    |



|                             |           |                          |             |
|-----------------------------|-----------|--------------------------|-------------|
| C8 C9 C14 K1 <sup>1</sup>   | -112.8(3) | K2 <sup>2</sup> C6 C1 C2 | -106.5(3)   |
| C1 C6 C7 P1                 | -145.9(3) | K2 <sup>2</sup> C6 C7 P1 | 142.7(2)    |
| C1 C6 C7 N1                 | 31.3(4)   | K2 <sup>2</sup> C6 C7 N1 | -40.1(2)    |
| C1 C6 C7 K2 <sup>2</sup>    | 71.4(3)   | K2 <sup>2</sup> N1 C7 P1 | -138.89(16) |
| C13 C12 C11 C10             | -1.4(6)   | K2 <sup>2</sup> N1 C7 C6 | 43.6(3)     |
| C13 C12 C11 K1 <sup>1</sup> | 68.9(3)   | K2 C21 C20 C19           | -110.6(3)   |
| C21 P2 C22 N4               | 0.5(2)    | K2 C21 C20 C15           | 68.3(3)     |

<sup>1</sup>1-X,2-Y,2-Z; <sup>2</sup>1-X,1-Y,1-Z

**Table 7 Hydrogen Atom Coordinates ( $\text{\AA}\times 10^4$ ) and Isotropic Displacement Parameters ( $\text{\AA}^2\times 10^3$ ) for 141224-1o.**

| Atom | x    | y     | z     | U(eq) |
|------|------|-------|-------|-------|
| H16  | 4222 | 2843  | 7798  | 124   |
| H17  | 2343 | 1800  | 7510  | 133   |
| H27  | 4036 | 7925  | 3126  | 113   |
| H12  | 6764 | 10752 | 14180 | 110   |
| H35A | 1873 | 3249  | -738  | 185   |
| H35B | 1673 | 2076  | -601  | 185   |
| H11  | 8556 | 11579 | 14178 | 111   |
| H4   | 9874 | 10056 | 7023  | 108   |
| H5   | 9429 | 10015 | 8511  | 91    |
| H10  | 8690 | 11134 | 12451 | 94    |
| H25  | 585  | 7103  | 2512  | 114   |
| H36A | 3488 | 3196  | 932   | 171   |
| H36B | 3320 | 4421  | 1082  | 171   |
| H19  | 864  | 3202  | 5576  | 101   |
| H26  | 2175 | 8024  | 2290  | 111   |
| H34A | 684  | 3812  | 35    | 181   |
| H34B | 95   | 2418  | -405  | 181   |
| H18  | 656  | 2003  | 6416  | 129   |
| H3   | 8340 | 9562  | 5280  | 109   |
| H2   | 6359 | 8962  | 4975  | 97    |
| H28  | 4299 | 6902  | 4178  | 93    |
| H24  | 821  | 6105  | 3573  | 93    |
| H1   | 5897 | 8951  | 6446  | 83    |
| H13  | 5032 | 9514  | 12433 | 99    |
| H15  | 4449 | 4077  | 6985  | 98    |

|      |      |      |       |     |
|------|------|------|-------|-----|
| H33A | 1072 | 4026 | 1694  | 205 |
| H33B | 853  | 2652 | 1274  | 205 |
| H14  | 5141 | 9076 | 10701 | 83  |
| H32A | 1313 | 5426 | 7642  | 154 |
| H32B | 1475 | 6790 | 8310  | 154 |
| H29A | 4520 | 6891 | 9839  | 149 |
| H29B | 3732 | 5497 | 9013  | 149 |
| H30A | 3111 | 5768 | 10367 | 224 |
| H30B | 3370 | 7147 | 10746 | 224 |
| H31A | 1301 | 5213 | 9067  | 222 |
| H31B | 1448 | 6576 | 9730  | 222 |

Table S4. Crystal structural analysis data for **7**

**Table 1** Crystal data and structure refinement for 20201229-1

|                                             |                                                                                                 |
|---------------------------------------------|-------------------------------------------------------------------------------------------------|
| Identification code                         | 20201229-1                                                                                      |
| Empirical formula                           | C <sub>200</sub> H <sub>208</sub> N <sub>16</sub> O <sub>8</sub> Na <sub>8</sub> P <sub>8</sub> |
| Formula weight                              | 3395.50                                                                                         |
| Temperature/K                               | 293(2)                                                                                          |
| Crystal system                              | tetragonal                                                                                      |
| Space group                                 | I4 <sub>1</sub> /a                                                                              |
| a/Å                                         | 27.3350(10)                                                                                     |
| b/Å                                         | 27.3350(10)                                                                                     |
| c/Å                                         | 12.7837(9)                                                                                      |
| α/°                                         | 90.00                                                                                           |
| β/°                                         | 90.00                                                                                           |
| γ/°                                         | 90.00                                                                                           |
| Volume/Å <sup>3</sup>                       | 9552.0(8)                                                                                       |
| Z                                           | 2                                                                                               |
| ρ <sub>calc</sub> /mg/mm <sup>3</sup>       | 1.181                                                                                           |
| m/mm <sup>-1</sup>                          | 0.151                                                                                           |
| F(000)                                      | 3584.0                                                                                          |
| Crystal size/mm <sup>3</sup>                | 0.21 × 0.16 × 0.07                                                                              |
| 2θ range for data collection                | 5.96 to 51.34°                                                                                  |
| Index ranges                                | -33 ≤ h ≤ 33, -33 ≤ k ≤ 33, -14 ≤ l ≤ 15                                                        |
| Reflections collected                       | 53479                                                                                           |
| Independent reflections                     | 4507[R(int) = 0.0878]                                                                           |
| Data/restraints/parameters                  | 4507/42/259                                                                                     |
| Goodness-of-fit on F <sup>2</sup>           | 1.037                                                                                           |
| Final R indexes [I ≥ 2σ (I)]                | R <sub>1</sub> = 0.0785, wR <sub>2</sub> = 0.2344                                               |
| Final R indexes [all data]                  | R <sub>1</sub> = 0.0976, wR <sub>2</sub> = 0.2576                                               |
| Largest diff. peak/hole / e Å <sup>-3</sup> | 0.49/-0.44                                                                                      |

**Table 2 Fractional Atomic Coordinates ( $\times 10^4$ ) and Equivalent Isotropic Displacement Parameters ( $\text{\AA}^2 \times 10^3$ ) for 20201229-1.  $U_{eq}$  is defined as 1/3 of the trace of the orthogonalised  $U_{ij}$  tensor.**

| Atom | x          | y          | z       | U(eq)    |
|------|------------|------------|---------|----------|
| C1   | -260.8(13) | 6849.4(13) | 2282(3) | 62.4(9)  |
| C2   | -548.8(15) | 6773.0(17) | 3161(3) | 75.9(11) |
| C3   | -521.9(16) | 6332.7(19) | 3696(4) | 83.9(12) |
| C4   | -211.8(18) | 5970.7(16) | 3347(3) | 80.8(12) |
| C5   | 77.1(15)   | 6047.2(13) | 2480(3) | 67.0(9)  |
| C6   | 60.6(12)   | 6490.9(12) | 1928(3) | 54.7(8)  |

|     |            |            |            |           |
|-----|------------|------------|------------|-----------|
| C7  | 396.8(11)  | 6578.0(11) | 1040(2)    | 50.8(7)   |
| C8  | 1027.1(12) | 6662.8(12) | -245(3)    | 54.2(8)   |
| C9  | 1464.9(12) | 6687.4(13) | -930(3)    | 60.6(8)   |
| C10 | 1834.1(15) | 6340.4(17) | -830(4)    | 80.4(12)  |
| C11 | 2259.6(17) | 6369(2)    | -1418(4)   | 99.1(15)  |
| C12 | 2315.7(17) | 6737(2)    | -2144(4)   | 100.8(16) |
| C13 | 1949.0(16) | 7077(2)    | -2265(4)   | 92.3(14)  |
| C14 | 1532.3(14) | 7055.8(17) | -1660(3)   | 75.0(11)  |
| C15 | 1510.0(17) | 7730(2)    | 1252(4)    | 92.2(14)  |
| C16 | 2040(2)    | 7673(2)    | 1048(5)    | 120(2)    |
| C17 | 2171(2)    | 8075(3)    | 338(6)     | 147(3)    |
| C18 | 1708.9(18) | 8267(2)    | -70(5)     | 110.8(18) |
| C19 | 3134(2)    | 5061(2)    | 239(5)     | 170(2)    |
| C20 | 3511(3)    | 5227.3(18) | -399(5)    | 178(2)    |
| C21 | 3821(2)    | 4894(3)    | -884(5)    | 178(2)    |
| C22 | 3755(2)    | 4395(2)    | -730(5)    | 175(2)    |
| C23 | 3378(3)    | 4229.2(18) | -92(5)     | 171(2)    |
| C24 | 3068(2)    | 4562(3)    | 393(4)     | 174(2)    |
| C25 | 2653(4)    | 4344(4)    | 971(8)     | 193(3)    |
| N1  | 641.7(9)   | 6954.5(10) | -433(2)    | 54.6(7)   |
| N2  | 283.2(9)   | 6907.6(9)  | 310(2)     | 53.4(6)   |
| Na1 | 547.8(4)   | 7864.6(5)  | -207.7(10) | 56.0(4)   |
| O1  | 1320(1)    | 7989.6(11) | 389(2)     | 81.8(8)   |
| P1  | 966.7(3)   | 6295.6(3)  | 870.8(8)   | 62.6(3)   |

**Table 3 Anisotropic Displacement Parameters ( $\text{\AA}^2 \times 10^3$ ) for 20201229-1. The Anisotropic displacement factor exponent takes the form:  $-\pi^2[h^2a^*2U_{11} + \dots + 2hka \times b \times U_{12}]$**

| Atom | $U_{11}$ | $U_{22}$ | $U_{33}$ | $U_{23}$ | $U_{13}$ | $U_{12}$ |
|------|----------|----------|----------|----------|----------|----------|
| C1   | 59.8(19) | 62(2)    | 65(2)    | -3.3(16) | -1.5(16) | 2.9(15)  |
| C2   | 65(2)    | 90(3)    | 72(2)    | -8(2)    | 6.3(19)  | 0.8(19)  |
| C3   | 79(3)    | 102(3)   | 71(2)    | 2(2)     | 10(2)    | -20(2)   |
| C4   | 103(3)   | 65(2)    | 74(2)    | 8.2(19)  | 4(2)     | -19(2)   |
| C5   | 82(2)    | 54.6(19) | 64(2)    | 1.4(16)  | 2.4(18)  | 0.0(17)  |
| C6   | 56.0(18) | 51.3(17) | 56.9(18) | -5.5(14) | -5.2(14) | -3.7(13) |
| C7   | 50.2(16) | 45.4(15) | 56.7(17) | -1.6(13) | -5.2(13) | -0.3(12) |
| C8   | 51.1(17) | 53.0(17) | 58.6(18) | -3.3(14) | -6.3(14) | 2.6(13)  |
| C9   | 50.4(17) | 70(2)    | 61.0(19) | -3.4(16) | -3.5(14) | -0.3(15) |
| C10  | 73(2)    | 84(3)    | 85(3)    | 6(2)     | 8(2)     | 18(2)    |
| C11  | 71(3)    | 117(4)   | 109(4)   | 5(3)     | 14(3)    | 31(3)    |

|     |          |          |          |         |           |          |
|-----|----------|----------|----------|---------|-----------|----------|
| C12 | 71(3)    | 138(5)   | 94(3)    | 5(3)    | 22(2)     | 9(3)     |
| C13 | 67(3)    | 119(4)   | 90(3)    | 19(3)   | 8(2)      | -5(2)    |
| C14 | 58(2)    | 85(3)    | 83(3)    | 14(2)   | 0.3(18)   | -3.9(18) |
| C15 | 86(3)    | 104(3)   | 86(3)    | 14(3)   | -16(2)    | -19(2)   |
| C16 | 85(3)    | 133(5)   | 142(5)   | 29(4)   | -27(3)    | 18(3)    |
| C17 | 65(3)    | 211(8)   | 165(6)   | 68(6)   | -14(3)    | -9(4)    |
| C18 | 76(3)    | 127(4)   | 130(4)   | 37(4)   | -21(3)    | -22(3)   |
| C19 | 213(5)   | 146(4)   | 153(4)   | 18(4)   | -24(4)    | -25(4)   |
| C20 | 216(5)   | 148(4)   | 170(5)   | 30(4)   | -28(4)    | -24(4)   |
| C21 | 197(5)   | 171(5)   | 166(5)   | 35(4)   | -30(4)    | -19(4)   |
| C22 | 192(5)   | 164(4)   | 170(5)   | 25(4)   | -32(4)    | -3(4)    |
| C23 | 197(5)   | 155(4)   | 161(5)   | 27(4)   | -30(4)    | -10(4)   |
| C24 | 210(5)   | 159(4)   | 152(4)   | 26(4)   | -24(4)    | -34(4)   |
| C25 | 225(6)   | 186(5)   | 168(5)   | 28(5)   | -17(5)    | -46(5)   |
| N1  | 48.5(14) | 55.9(15) | 59.2(16) | 3.6(12) | -3.3(12)  | 2.7(11)  |
| N2  | 49.9(14) | 50.9(14) | 59.2(16) | 2.6(12) | -2.9(12)  | 2.3(11)  |
| Na1 | 46.3(7)  | 61.8(8)  | 60.0(8)  | -0.4(6) | -1.2(5)   | 3.0(5)   |
| O1  | 57.3(15) | 91.7(19) | 96(2)    | 8.1(16) | -17.1(14) | -8.0(13) |
| P1  | 60.0(6)  | 60.8(6)  | 67.2(6)  | 8.9(4)  | -2.4(4)   | 14.9(4)  |

**Table 4 Bond Lengths for 20201229-1.**

| Atom | Atom | Length/Å | Atom | Atom             | Length/Å  |
|------|------|----------|------|------------------|-----------|
| C1   | C2   | 1.387(5) | C17  | C18              | 1.465(7)  |
| C1   | C6   | 1.391(5) | C18  | O1               | 1.431(6)  |
| C2   | C3   | 1.386(6) | C19  | C20              | 1.3900    |
| C3   | C4   | 1.377(7) | C19  | C24              | 1.3900    |
| C4   | C5   | 1.377(6) | C20  | C21              | 1.3900    |
| C5   | C6   | 1.403(5) | C21  | C22              | 1.3900    |
| C6   | C7   | 1.480(5) | C22  | C23              | 1.3900    |
| C7   | N2   | 1.334(4) | C23  | C24              | 1.3900    |
| C7   | P1   | 1.752(3) | C24  | C25              | 1.479(10) |
| C8   | C9   | 1.485(5) | N1   | N2               | 1.371(4)  |
| C8   | N1   | 1.343(4) | N1   | Na1              | 2.517(3)  |
| C8   | P1   | 1.752(3) | N1   | Na1 <sup>1</sup> | 2.494(3)  |
| C9   | C10  | 1.391(5) | N2   | Na1              | 2.794(3)  |
| C9   | C14  | 1.385(5) | N2   | Na1 <sup>2</sup> | 2.447(3)  |
| C10  | C11  | 1.387(6) | Na1  | N1 <sup>3</sup>  | 2.494(3)  |
| C11  | C12  | 1.377(7) | Na1  | N2 <sup>2</sup>  | 2.447(3)  |
| C12  | C13  | 1.375(7) | Na1  | Na1 <sup>1</sup> | 3.684(2)  |

|     |     |          |     |                  |          |
|-----|-----|----------|-----|------------------|----------|
| C13 | C14 | 1.379(6) | Na1 | Na1 <sup>3</sup> | 3.684(2) |
| C15 | C16 | 1.481(7) | Na1 | Na1 <sup>2</sup> | 3.597(2) |
| C15 | O1  | 1.411(5) | Na1 | O1               | 2.270(3) |
| C16 | C17 | 1.468(9) |     |                  |          |

<sup>1</sup>-3/4+Y,3/4-X,-1/4-Z; <sup>2</sup>-X,3/2-Y,+Z; <sup>3</sup>3/4-Y,3/4+X,-1/4-Z

**Table 5 Bond Angles for 20201229-1.**

| Atom | Atom | Atom | Angle/°  | Atom             | Atom | Atom             | Angle/°    |
|------|------|------|----------|------------------|------|------------------|------------|
| C2   | C1   | C6   | 121.0(4) | Na1 <sup>1</sup> | N1   | Na1              | 94.63(10)  |
| C3   | C2   | C1   | 120.0(4) | C7               | N2   | N1               | 112.5(3)   |
| C4   | C3   | C2   | 119.8(4) | C7               | N2   | Na1              | 137.5(2)   |
| C3   | C4   | C5   | 120.3(4) | C7               | N2   | Na1 <sup>2</sup> | 125.3(2)   |
| C4   | C5   | C6   | 121.1(4) | N1               | N2   | Na1              | 64.09(15)  |
| C1   | C6   | C5   | 117.8(3) | N1               | N2   | Na1 <sup>2</sup> | 116.90(18) |
| C1   | C6   | C7   | 121.9(3) | Na1 <sup>2</sup> | N2   | Na1              | 86.44(9)   |
| C5   | C6   | C7   | 120.3(3) | N1 <sup>3</sup>  | Na1  | N1               | 101.02(8)  |
| C6   | C7   | P1   | 125.2(2) | N1 <sup>3</sup>  | Na1  | N2               | 120.62(9)  |
| N2   | C7   | C6   | 120.1(3) | N1               | Na1  | N2               | 29.33(8)   |
| N2   | C7   | P1   | 114.7(2) | N1               | Na1  | Na1 <sup>2</sup> | 62.44(7)   |
| C9   | C8   | P1   | 125.6(2) | N1               | Na1  | Na1 <sup>3</sup> | 96.92(7)   |
| N1   | C8   | C9   | 120.0(3) | N1 <sup>3</sup>  | Na1  | Na1 <sup>2</sup> | 99.56(7)   |
| N1   | C8   | P1   | 114.4(2) | N1 <sup>3</sup>  | Na1  | Na1 <sup>3</sup> | 42.93(7)   |
| C10  | C9   | C8   | 120.0(3) | N1               | Na1  | Na1 <sup>1</sup> | 42.44(6)   |
| C14  | C9   | C8   | 122.5(3) | N1 <sup>3</sup>  | Na1  | Na1 <sup>1</sup> | 61.06(7)   |
| C14  | C9   | C10  | 117.5(4) | N2 <sup>2</sup>  | Na1  | N1 <sup>3</sup>  | 100.25(10) |
| C11  | C10  | C9   | 121.3(4) | N2 <sup>2</sup>  | Na1  | N1               | 112.16(10) |
| C12  | C11  | C10  | 120.0(4) | N2 <sup>2</sup>  | Na1  | N2               | 86.21(10)  |
| C13  | C12  | C11  | 119.2(4) | N2 <sup>2</sup>  | Na1  | Na1 <sup>3</sup> | 62.12(7)   |
| C12  | C13  | C14  | 120.7(5) | N2               | Na1  | Na1 <sup>1</sup> | 60.14(6)   |
| C13  | C14  | C9   | 121.3(4) | N2 <sup>2</sup>  | Na1  | Na1 <sup>1</sup> | 103.99(7)  |
| O1   | C15  | C16  | 105.9(4) | N2               | Na1  | Na1 <sup>3</sup> | 97.09(6)   |
| C17  | C16  | C15  | 105.7(5) | N2 <sup>2</sup>  | Na1  | Na1 <sup>2</sup> | 50.81(7)   |
| C18  | C17  | C16  | 106.1(5) | N2               | Na1  | Na1 <sup>2</sup> | 42.75(6)   |
| O1   | C18  | C17  | 107.7(5) | Na1 <sup>2</sup> | Na1  | Na1 <sup>3</sup> | 60.77(2)   |
| C20  | C19  | C24  | 120.0    | Na1 <sup>2</sup> | Na1  | Na1 <sup>1</sup> | 60.77(2)   |
| C19  | C20  | C21  | 120.0    | Na1 <sup>3</sup> | Na1  | Na1 <sup>1</sup> | 58.45(4)   |
| C22  | C21  | C20  | 120.0    | O1               | Na1  | N1               | 95.31(10)  |
| C21  | C22  | C23  | 120.0    | O1               | Na1  | N1 <sup>3</sup>  | 106.08(11) |

|     |     |                  |            |     |     |                  |            |
|-----|-----|------------------|------------|-----|-----|------------------|------------|
| C22 | C23 | C24              | 120.0      | O1  | Na1 | N2               | 107.59(10) |
| C19 | C24 | C25              | 124.4(7)   | O1  | Na1 | N2 <sup>2</sup>  | 137.22(12) |
| C23 | C24 | C19              | 120.0      | O1  | Na1 | Na1 <sup>3</sup> | 148.43(10) |
| C23 | C24 | C25              | 115.3(7)   | O1  | Na1 | Na1 <sup>2</sup> | 149.03(9)  |
| C8  | N1  | N2               | 112.4(3)   | O1  | Na1 | Na1 <sup>1</sup> | 118.13(10) |
| C8  | N1  | Na1 <sup>1</sup> | 114.1(2)   | C15 | O1  | C18              | 108.3(3)   |
| C8  | N1  | Na1              | 130.3(2)   | C15 | O1  | Na1              | 121.9(3)   |
| N2  | N1  | Na1              | 86.58(17)  | C18 | O1  | Na1              | 129.2(3)   |
| N2  | N1  | Na1 <sup>1</sup> | 116.29(18) | C8  | P1  | C7               | 86.10(15)  |

<sup>1</sup>-3/4+Y,3/4-X,-1/4-Z; <sup>2</sup>-X,3/2-Y,+Z; <sup>3</sup>3/4-Y,3/4+X,-1/4-Z

**Table 6 Hydrogen Atom Coordinates (Å×10<sup>4</sup>) and Isotropic Displacement Parameters (Å<sup>2</sup>×10<sup>3</sup>) for 20201229-1.**

| Atom | x    | y    | z     | U(eq) |
|------|------|------|-------|-------|
| H1   | -283 | 7145 | 1924  | 75    |
| H2   | -760 | 7017 | 3390  | 91    |
| H3   | -713 | 6282 | 4289  | 101   |
| H4   | -197 | 5673 | 3699  | 97    |
| H5   | 287  | 5801 | 2255  | 80    |
| H10  | 1795 | 6084 | -360  | 96    |
| H11  | 2507 | 6140 | -1322 | 119   |
| H12  | 2598 | 6756 | -2548 | 121   |
| H13  | 1982 | 7324 | -2761 | 111   |
| H14  | 1292 | 7293 | -1742 | 90    |
| H15A | 1354 | 7412 | 1312  | 111   |
| H15B | 1456 | 7910 | 1895  | 111   |
| H16A | 2225 | 7696 | 1694  | 144   |
| H16B | 2107 | 7359 | 725   | 144   |
| H17A | 2348 | 8328 | 711   | 176   |
| H17B | 2375 | 7955 | -228  | 176   |
| H18A | 1675 | 8610 | 109   | 133   |
| H18B | 1700 | 8236 | -826  | 133   |
| H19  | 2927 | 5284 | 563   | 204   |
| H20  | 3555 | 5561 | -502  | 214   |
| H21  | 4073 | 5006 | -1311 | 214   |
| H22  | 3963 | 4173 | -1055 | 210   |
| H23  | 3334 | 3895 | 11    | 205   |
| H25A | 2683 | 3994 | 966   | 290   |
| H25B | 2352 | 4437 | 642   | 290   |
| H25C | 2656 | 4460 | 1680  | 290   |

Table S5. Crystal structural analysis data for **8**

**Table 1 Crystal data and structure refinement for 141222-1z.**

|                                             |                                                               |
|---------------------------------------------|---------------------------------------------------------------|
| Identification code                         | 141222-1z                                                     |
| Empirical formula                           | C <sub>10</sub> H <sub>18</sub> KN <sub>2</sub> P             |
| Formula weight                              | 236.33                                                        |
| Temperature/K                               | 293(2)                                                        |
| Crystal system                              | monoclinic                                                    |
| Space group                                 | P2 <sub>1</sub> /n                                            |
| a/Å                                         | 5.9693(4)                                                     |
| b/Å                                         | 10.4799(6)                                                    |
| c/Å                                         | 20.6520(11)                                                   |
| α/°                                         | 90                                                            |
| β/°                                         | 90.804(6)                                                     |
| γ/°                                         | 90                                                            |
| Volume/Å <sup>3</sup>                       | 1291.81(13)                                                   |
| Z                                           | 4                                                             |
| ρ <sub>calc</sub> /cm <sup>3</sup>          | 1.215                                                         |
| μ/mm <sup>-1</sup>                          | 0.503                                                         |
| F(000)                                      | 504.0                                                         |
| Crystal size/mm <sup>3</sup>                | 0.2 × 0.08 × 0.06                                             |
| Radiation                                   | MoKα (λ = 0.71073)                                            |
| 2θ range for data collection/°              | 7.072 to 51.298                                               |
| Index ranges                                | -7 ≤ h ≤ 7, -12 ≤ k ≤ 12, -25 ≤ l ≤ 25                        |
| Reflections collected                       | 7670                                                          |
| Independent reflections                     | 2454 [R <sub>int</sub> = 0.0391, R <sub>sigma</sub> = 0.0487] |
| Data/restraints/parameters                  | 2454/0/133                                                    |
| Goodness-of-fit on F <sup>2</sup>           | 1.095                                                         |
| Final R indexes [I ≥ 2σ (I)]                | R <sub>1</sub> = 0.0523, wR <sub>2</sub> = 0.1412             |
| Final R indexes [all data]                  | R <sub>1</sub> = 0.0846, wR <sub>2</sub> = 0.1549             |
| Largest diff. peak/hole / e Å <sup>-3</sup> | 0.38/-0.22                                                    |

**Table 2 Fractional Atomic Coordinates (×10<sup>4</sup>) and Equivalent Isotropic Displacement Parameters (Å<sup>2</sup>×10<sup>3</sup>) for 141222-1z. U<sub>eq</sub> is defined as 1/3 of the trace of the orthogonalised U<sub>ij</sub> tensor.**

| Ato | x | y | z | U(eq) |
|-----|---|---|---|-------|
| m   |   |   |   |       |



|     |             |           |            |          |
|-----|-------------|-----------|------------|----------|
| N2  | 2410(5)     | 6257(3)   | 5216.1(13) | 36.0(7)  |
| N1  | 2530(5)     | 6055(3)   | 4554.1(14) | 36.2(7)  |
| P1  | 2342(2)     | 8523.6(9) | 4692.6(5)  | 47.8(3)  |
| C3  | 1540(8)     | 5938(4)   | 3190(2)    | 63.9(12) |
| C4  | 2791(6)     | 7076(3)   | 3484.7(16) | 39.5(9)  |
| C6  | 2308(5)     | 7493(3)   | 5362.9(16) | 33.4(8)  |
| C5  | 2513(5)     | 7135(3)   | 4219.4(16) | 32.8(8)  |
| C1  | 1957(9)     | 8304(4)   | 3165(2)    | 65.4(13) |
| C7  | 2044(6)     | 7894(4)   | 6070.1(17) | 38.8(9)  |
| C9  | -464(7)     | 7918(4)   | 6224(2)    | 57.6(11) |
| C8  | 2995(8)     | 9226(4)   | 6181(2)    | 61.9(12) |
| C10 | 3185(8)     | 6938(4)   | 6525(2)    | 61.2(12) |
| C2  | 5278(7)     | 6940(5)   | 3346(2)    | 72.0(15) |
| K1  | -2552.6(13) | 6354.6(8) | 4882.9(4)  | 42.7(3)  |

**Table 3 Anisotropic Displacement Parameters ( $\text{\AA}^2 \times 10^3$ ) for 141222-1z. The Anisotropic displacement factor exponent takes the form:  $-2\pi^2[h^2a^*U_{11}+2hka^*b^*U_{12}+\dots]$ .**

| Ato<br>m | $U_{11}$ | $U_{22}$ | $U_{33}$ | $U_{23}$ | $U_{13}$ | $U_{12}$ |
|----------|----------|----------|----------|----------|----------|----------|
| N2       | 42.0(17) | 34.8(16) | 31.1(15) | 0.7(13)  | 1.0(13)  | -0.7(13) |
| N1       | 42.2(18) | 34.3(16) | 32.2(16) | -0.7(12) | 1.3(13)  | 1.8(13)  |
| P1       | 74.1(8)  | 32.6(5)  | 37.0(6)  | 2.8(4)   | 7.6(5)   | 1.0(5)   |
| C3       | 77(3)    | 66(3)    | 49(3)    | -11(2)   | 1(2)     | -9(3)    |
| C4       | 39(2)    | 45(2)    | 34.3(19) | 1.4(16)  | -0.3(16) | -2.0(17) |
| C6       | 27.7(18) | 38(2)    | 34.4(19) | 0.2(15)  | 2.6(14)  | -1.6(14) |
| C5       | 29.9(18) | 34.7(19) | 34.0(18) | 1.9(15)  | 2.2(14)  | -1.1(15) |
| C1       | 93(4)    | 62(3)    | 41(2)    | 12(2)    | -7(2)    | 4(3)     |
| C7       | 37(2)    | 46(2)    | 33.7(19) | -1.8(16) | 1.0(15)  | 1.3(17)  |
| C9       | 45(2)    | 80(3)    | 47(2)    | -4(2)    | 9.0(19)  | 3(2)     |
| C8       | 74(3)    | 58(3)    | 54(3)    | -17(2)   | 5(2)     | -11(2)   |
| C10      | 61(3)    | 77(3)    | 46(2)    | 2(2)     | -7(2)    | 11(2)    |
| C2       | 47(3)    | 126(5)   | 44(2)    | 4(3)     | 13(2)    | 4(3)     |
| K1       | 38.9(5)  | 39.5(5)  | 49.6(5)  | 3.7(4)   | -5.1(4)  | -1.8(4)  |

**Table 4 Bond Lengths for 141222-1z.**

| Ato<br>m | Ato<br>m | Length/ $\text{\AA}$ | Ato<br>m | Ato<br>m | Length/ $\text{\AA}$ |
|----------|----------|----------------------|----------|----------|----------------------|
|----------|----------|----------------------|----------|----------|----------------------|

|    |                 |            |    |                 |          |
|----|-----------------|------------|----|-----------------|----------|
| N2 | N1              | 1.386(4)   | C6 | C7              | 1.530(5) |
| N2 | C6              | 1.332(4)   | C6 | K1 <sup>1</sup> | 3.450(3) |
| N2 | K1              | 3.034(3)   | C6 | K1              | 3.278(3) |
| N2 | K1 <sup>1</sup> | 3.096(3)   | C5 | K1 <sup>1</sup> | 3.333(3) |
| N2 | K1 <sup>2</sup> | 2.746(3)   | C5 | K1              | 3.436(3) |
| N1 | C5              | 1.327(4)   | C7 | C9              | 1.535(5) |
| N1 | K1 <sup>2</sup> | 2.780(3)   | C7 | C8              | 1.523(5) |
| N1 | K1 <sup>1</sup> | 3.020(3)   | C7 | C10             | 1.527(5) |
| N1 | K1              | 3.134(3)   | C9 | K1              | 3.436(4) |
| P1 | C6              | 1.756(3)   | C2 | K1 <sup>1</sup> | 3.466(4) |
| P1 | C5              | 1.756(4)   | K1 | N2 <sup>3</sup> | 3.096(3) |
| P1 | K1              | 3.7269(14) | K1 | N2 <sup>2</sup> | 2.746(3) |
| P1 | K1 <sup>1</sup> | 3.8178(14) | K1 | N1 <sup>3</sup> | 3.020(3) |
| C3 | C4              | 1.530(5)   | K1 | N1 <sup>2</sup> | 2.780(3) |
| C4 | C5              | 1.530(5)   | K1 | C6 <sup>3</sup> | 3.450(3) |
| C4 | C1              | 1.526(5)   | K1 | C5 <sup>3</sup> | 3.333(3) |
| C4 | C2              | 1.523(5)   | K1 | C2 <sup>3</sup> | 3.466(4) |

<sup>1</sup>1+X,+Y,+Z; <sup>2</sup>-X,1-Y,1-Z; <sup>3</sup>-1+X,+Y,+Z

**Table 5 Bond Angles for 141222-1z.**

| Ato<br>m        | Ato<br>m | Ato<br>m        | Angle/°    | Ato<br>m        | Ato<br>m | Ato<br>m        | Angle/°   |
|-----------------|----------|-----------------|------------|-----------------|----------|-----------------|-----------|
| N1              | N2       | K1 <sup>1</sup> | 73.87(17)  | N2 <sup>2</sup> | K1       | N1              | 81.54(8)  |
| N1              | N2       | K1              | 81.09(17)  | N2 <sup>2</sup> | K1       | N1 <sup>3</sup> | 84.87(8)  |
| N1              | N2       | K1 <sup>2</sup> | 76.82(17)  | N2 <sup>2</sup> | K1       | N1 <sup>2</sup> | 29.05(8)  |
| C6              | N2       | N1              | 112.1(3)   | N2              | K1       | N1              | 25.91(7)  |
| C6              | N2       | K1              | 88.34(19)  | N2 <sup>3</sup> | K1       | N1              | 172.35(8) |
| C6              | N2       | K1 <sup>2</sup> | 171.1(2)   | N2 <sup>2</sup> | K1       | C6              | 110.93(9) |
| C6              | N2       | K1 <sup>1</sup> | 93.8(2)    | N2              | K1       | C6 <sup>3</sup> | 144.68(8) |
| K1 <sup>2</sup> | N2       | K1              | 92.74(8)   | N2 <sup>3</sup> | K1       | C6 <sup>3</sup> | 22.66(7)  |
| K1 <sup>2</sup> | N2       | K1 <sup>1</sup> | 89.15(8)   | N2 <sup>2</sup> | K1       | C6 <sup>3</sup> | 113.25(9) |
| K1              | N2       | K1 <sup>1</sup> | 153.76(10) | N2 <sup>3</sup> | K1       | C6              | 143.44(8) |
| N2              | N1       | K1 <sup>2</sup> | 74.12(16)  | N2              | K1       | C6              | 23.97(8)  |
| N2              | N1       | K1              | 72.99(17)  | N2 <sup>2</sup> | K1       | C5 <sup>3</sup> | 104.02(9) |
| N2              | N1       | K1 <sup>1</sup> | 79.96(17)  | N2 <sup>2</sup> | K1       | C5              | 100.33(9) |
| C5              | N1       | N2              | 112.5(3)   | N2              | K1       | C5 <sup>3</sup> | 162.95(9) |
| C5              | N1       | K1 <sup>2</sup> | 173.3(2)   | N2              | K1       | C5              | 40.22(7)  |
| C5              | N1       | K1              | 91.5(2)    | N2 <sup>3</sup> | K1       | C5              | 163.62(8) |

|                 |    |                 |            |                 |    |                 |            |
|-----------------|----|-----------------|------------|-----------------|----|-----------------|------------|
| C5              | N1 | K1 <sup>1</sup> | 91.64(19)  | N2 <sup>3</sup> | K1 | C5 <sup>3</sup> | 40.89(7)   |
| K1 <sup>2</sup> | N1 | K1 <sup>1</sup> | 90.08(8)   | N2 <sup>2</sup> | K1 | C9              | 121.59(10) |
| K1 <sup>1</sup> | N1 | K1              | 151.84(10) | N2 <sup>3</sup> | K1 | C9              | 100.32(9)  |
| K1 <sup>2</sup> | N1 | K1              | 89.97(8)   | N2              | K1 | C9              | 59.42(9)   |
| C6              | P1 | C5              | 86.03(16)  | N2 <sup>2</sup> | K1 | C2 <sup>3</sup> | 96.87(11)  |
| C6              | P1 | K1 <sup>1</sup> | 64.59(11)  | N2              | K1 | C2 <sup>3</sup> | 124.39(9)  |
| C6              | P1 | K1              | 61.58(11)  | N2 <sup>3</sup> | K1 | C2 <sup>3</sup> | 81.83(9)   |
| C5              | P1 | K1 <sup>1</sup> | 60.76(11)  | N1 <sup>3</sup> | K1 | N2              | 172.09(8)  |
| C5              | P1 | K1              | 66.75(11)  | N1 <sup>3</sup> | K1 | N2 <sup>3</sup> | 26.16(7)   |
| K1              | P1 | K1 <sup>1</sup> | 104.59(3)  | N1 <sup>2</sup> | K1 | N2 <sup>3</sup> | 82.88(8)   |
| C5              | C4 | C3              | 111.5(3)   | N1 <sup>2</sup> | K1 | N2              | 82.85(8)   |
| C1              | C4 | C3              | 109.3(3)   | N1 <sup>3</sup> | K1 | N1              | 151.84(10) |
| C1              | C4 | C5              | 110.8(3)   | N1 <sup>2</sup> | K1 | N1 <sup>3</sup> | 89.91(8)   |
| C2              | C4 | C3              | 108.9(4)   | N1 <sup>2</sup> | K1 | N1              | 90.03(8)   |
| C2              | C4 | C5              | 108.1(3)   | N1              | K1 | C6 <sup>3</sup> | 164.65(8)  |
| C2              | C4 | C1              | 108.1(4)   | N1 <sup>3</sup> | K1 | C6              | 163.60(9)  |
| N2              | C6 | P1              | 114.7(2)   | N1 <sup>3</sup> | K1 | C6 <sup>3</sup> | 40.11(8)   |
| N2              | C6 | C7              | 119.3(3)   | N1 <sup>2</sup> | K1 | C6 <sup>3</sup> | 101.14(9)  |
| N2              | C6 | K1 <sup>1</sup> | 63.54(18)  | N1              | K1 | C6              | 41.12(8)   |
| N2              | C6 | K1              | 67.69(18)  | N1 <sup>2</sup> | K1 | C6              | 101.84(9)  |
| P1              | C6 | K1 <sup>1</sup> | 88.05(12)  | N1              | K1 | C5              | 22.71(7)   |
| P1              | C6 | K1              | 90.31(12)  | N1 <sup>3</sup> | K1 | C5              | 142.48(8)  |
| C7              | C6 | P1              | 125.9(3)   | N1 <sup>2</sup> | K1 | C5              | 112.58(9)  |
| C7              | C6 | K1 <sup>1</sup> | 118.2(2)   | N1 <sup>3</sup> | K1 | C5 <sup>3</sup> | 23.45(7)   |
| C7              | C6 | K1              | 106.6(2)   | N1              | K1 | C5 <sup>3</sup> | 142.00(8)  |
| K1              | C6 | K1 <sup>1</sup> | 125.03(11) | N1 <sup>2</sup> | K1 | C5 <sup>3</sup> | 113.21(9)  |
| N1              | C5 | P1              | 114.7(2)   | N1              | K1 | C9              | 83.17(8)   |
| N1              | C5 | C4              | 118.8(3)   | N1 <sup>2</sup> | K1 | C9              | 95.53(10)  |
| N1              | C5 | K1 <sup>1</sup> | 64.92(18)  | N1 <sup>3</sup> | K1 | C9              | 124.84(9)  |
| N1              | C5 | K1              | 65.75(18)  | N1 <sup>3</sup> | K1 | C2 <sup>3</sup> | 57.52(9)   |
| P1              | C5 | K1 <sup>1</sup> | 91.87(13)  | N1              | K1 | C2 <sup>3</sup> | 99.77(9)   |
| P1              | C5 | K1              | 85.24(12)  | N1 <sup>2</sup> | K1 | C2 <sup>3</sup> | 122.91(11) |
| C4              | C5 | P1              | 126.4(3)   | C6              | K1 | C6 <sup>3</sup> | 125.03(11) |
| C4              | C5 | K1 <sup>1</sup> | 106.9(2)   | C6              | K1 | C5 <sup>3</sup> | 143.93(9)  |
| C4              | C5 | K1              | 119.6(2)   | C6              | K1 | C5              | 41.73(8)   |
| K1 <sup>1</sup> | C5 | K1              | 123.71(10) | C6              | K1 | C9              | 43.38(9)   |
| C6              | C7 | C9              | 108.4(3)   | C6 <sup>3</sup> | K1 | C2 <sup>3</sup> | 83.09(9)   |
| C8              | C7 | C6              | 110.6(3)   | C6              | K1 | C2 <sup>3</sup> | 122.02(10) |
| C8              | C7 | C9              | 108.4(3)   | C5 <sup>3</sup> | K1 | C6 <sup>3</sup> | 41.33(8)   |
| C8              | C7 | C10             | 110.3(3)   | C5              | K1 | C6 <sup>3</sup> | 145.41(9)  |

|                 |    |                 |            |                 |    |                 |            |
|-----------------|----|-----------------|------------|-----------------|----|-----------------|------------|
| C10             | C7 | C6              | 110.9(3)   | C5 <sup>3</sup> | K1 | C5              | 123.71(10) |
| C10             | C7 | C9              | 108.1(3)   | C5 <sup>3</sup> | K1 | C9              | 121.52(10) |
| C7              | C9 | K1              | 99.8(2)    | C5              | K1 | C9              | 84.06(9)   |
| C4              | C2 | K1 <sup>1</sup> | 101.4(2)   | C5              | K1 | C2 <sup>3</sup> | 84.96(9)   |
| N2              | K1 | N2 <sup>3</sup> | 153.76(10) | C5 <sup>3</sup> | K1 | C2 <sup>3</sup> | 42.56(9)   |
| N2 <sup>2</sup> | K1 | N2              | 87.26(8)   | C9              | K1 | C6 <sup>3</sup> | 85.27(9)   |
| N2 <sup>2</sup> | K1 | N2 <sup>3</sup> | 90.85(8)   | C9              | K1 | C2 <sup>3</sup> | 141.29(12) |

<sup>1</sup>1+X,+Y,+Z; <sup>2</sup>-X,1-Y,1-Z; <sup>3</sup>-1+X,+Y,+Z

**Table 6 Torsion Angles for 141222-1z.**

| A  | B  | C  | D               | Angle/°    | A               | B  | C  | D               | Angle/°     |
|----|----|----|-----------------|------------|-----------------|----|----|-----------------|-------------|
| N2 | N1 | C5 | P1              | -0.1(4)    | C2              | C4 | C5 | K1              | -157.8(3)   |
| N2 | N1 | C5 | C4              | 176.0(3)   | C2              | C4 | C5 | K1 <sup>1</sup> | -10.7(4)    |
| N2 | N1 | C5 | K1              | -72.2(2)   | K1 <sup>1</sup> | N2 | N1 | C5              | -87.6(2)    |
| N2 | N1 | C5 | K1 <sup>1</sup> | 79.8(2)    | K1 <sup>2</sup> | N2 | N1 | C5              | 179.4(3)    |
| N2 | C6 | C7 | C9              | -87.0(4)   | K1              | N2 | N1 | C5              | 84.5(2)     |
| N2 | C6 | C7 | C8              | 154.2(3)   | K1 <sup>1</sup> | N2 | N1 | K1              | -172.07(8)  |
| N2 | C6 | C7 | C10             | 31.6(5)    | K1 <sup>1</sup> | N2 | N1 | K1 <sup>2</sup> | 92.97(6)    |
| N1 | N2 | C6 | P1              | 0.2(4)     | K1              | N2 | N1 | K1 <sup>1</sup> | 172.07(8)   |
| N1 | N2 | C6 | C7              | 176.8(3)   | K1              | N2 | N1 | K1 <sup>2</sup> | -94.96(6)   |
| N1 | N2 | C6 | K1 <sup>1</sup> | -74.1(2)   | K1 <sup>2</sup> | N2 | N1 | K1              | 94.96(6)    |
| N1 | N2 | C6 | K1              | 79.7(2)    | K1 <sup>2</sup> | N2 | N1 | K1 <sup>1</sup> | -92.97(6)   |
| P1 | C6 | C7 | C9              | 89.3(4)    | K1 <sup>1</sup> | N2 | C6 | P1              | 74.3(2)     |
| P1 | C6 | C7 | C8              | -29.5(4)   | K1              | N2 | C6 | P1              | -79.5(2)    |
| P1 | C6 | C7 | C10             | -152.2(3)  | K1              | N2 | C6 | C7              | 97.1(3)     |
| C3 | C4 | C5 | N1              | 38.8(5)    | K1 <sup>1</sup> | N2 | C6 | C7              | -109.0(3)   |
| C3 | C4 | C5 | P1              | -145.6(3)  | K1 <sup>1</sup> | N2 | C6 | K1              | 153.82(11)  |
| C3 | C4 | C5 | K1              | -38.1(4)   | K1              | N2 | C6 | K1 <sup>1</sup> | -153.82(11) |
| C3 | C4 | C5 | K1 <sup>1</sup> | 109.0(3)   | K1 <sup>1</sup> | N1 | C5 | P1              | -79.9(2)    |
| C3 | C4 | C2 | K1 <sup>1</sup> | -111.3(3)  | K1              | N1 | C5 | P1              | 72.1(2)     |
| C6 | N2 | N1 | C5              | -0.1(4)    | K1              | N1 | C5 | C4              | -111.8(3)   |
| C6 | N2 | N1 | K1 <sup>2</sup> | -179.5(3)  | K1 <sup>1</sup> | N1 | C5 | C4              | 96.2(3)     |
| C6 | N2 | N1 | K1              | -84.5(2)   | K1 <sup>1</sup> | N1 | C5 | K1              | -152.02(11) |
| C6 | N2 | N1 | K1 <sup>1</sup> | 87.5(2)    | K1              | N1 | C5 | K1 <sup>1</sup> | 152.02(11)  |
| C6 | P1 | C5 | N1              | 0.2(3)     | K1 <sup>1</sup> | P1 | C6 | N2              | -59.6(2)    |
| C6 | P1 | C5 | C4              | -175.6(3)  | K1              | P1 | C6 | N2              | 65.5(2)     |
| C6 | P1 | C5 | K1              | 60.69(12)  | K1              | P1 | C6 | C7              | -110.9(3)   |
| C6 | P1 | C5 | K1 <sup>1</sup> | -62.99(13) | K1 <sup>1</sup> | P1 | C6 | C7              | 124.0(3)    |
| C6 | C7 | C9 | K1              | 12.6(3)    | K1 <sup>1</sup> | P1 | C6 | K1              | -125.04(10) |
| C5 | P1 | C6 | N2              | -0.2(3)    | K1              | P1 | C6 | K1 <sup>1</sup> | 125.04(10)  |

|                          |            |                           |             |
|--------------------------|------------|---------------------------|-------------|
| C5 P1 C6 C7              | -176.6(3)  | K1 P1 C5 N1               | -60.5(2)    |
| C5 P1 C6 K1 <sup>1</sup> | 59.39(12)  | K1 <sup>1</sup> P1 C5 N1  | 63.1(2)     |
| C5 P1 C6 K1              | -65.65(13) | K1 P1 C5 C4               | 123.7(3)    |
| C5 C4 C2 K1 <sup>1</sup> | 10.0(3)    | K1 <sup>1</sup> P1 C5 C4  | -112.6(3)   |
| C1 C4 C5 N1              | 160.8(3)   | K1 P1 C5 K1 <sup>1</sup>  | -123.68(10) |
| C1 C4 C5 P1              | -23.6(4)   | K1 <sup>1</sup> P1 C5 K1  | 123.68(10)  |
| C1 C4 C5 K1              | 83.9(3)    | K1 C6 C7 C9               | -13.6(3)    |
| C1 C4 C5 K1 <sup>1</sup> | -129.0(3)  | K1 <sup>1</sup> C6 C7 C9  | -160.8(2)   |
| C1 C4 C2 K1 <sup>1</sup> | 130.0(3)   | K1 C6 C7 C8               | -132.4(3)   |
| C8 C7 C9 K1              | 132.8(3)   | K1 <sup>1</sup> C6 C7 C8  | 80.4(3)     |
| C10C7 C9 K1              | -107.7(3)  | K1 C6 C7 C10              | 104.9(3)    |
| C2 C4 C5 N1              | -80.9(4)   | K1 <sup>1</sup> C6 C7 C10 | -42.2(4)    |
| C2 C4 C5 P1              | 94.7(4)    |                           |             |

<sup>1</sup>1+X,+Y,+Z; <sup>2</sup>-X,1-Y,1-Z

**Table 7 Hydrogen Atom Coordinates ( $\text{\AA}\times 10^4$ ) and Isotropic Displacement Parameters ( $\text{\AA}^2\times 10^3$ ) for 141222-1z.**

| Atom | x     | y    | z    | U(eq) |
|------|-------|------|------|-------|
| H3A  | 2155  | 5160 | 3361 | 96    |
| H3B  | 1697  | 5947 | 2728 | 96    |
| H3C  | -19   | 5991 | 3295 | 96    |
| H1A  | 2070  | 8229 | 2703 | 98    |
| H1B  | 2853  | 9009 | 3313 | 98    |
| H1C  | 422   | 8446 | 3277 | 98    |
| H9A  | -1231 | 8467 | 5922 | 86    |
| H9B  | -666  | 8231 | 6656 | 86    |
| H9C  | -1063 | 7070 | 6189 | 86    |
| H8A  | 4564  | 9228 | 6086 | 93    |
| H8B  | 2790  | 9468 | 6625 | 93    |
| H8C  | 2230  | 9823 | 5903 | 93    |
| H10A | 2471  | 6121 | 6482 | 92    |
| H10B | 3065  | 7230 | 6964 | 92    |
| H10C | 4738  | 6863 | 6416 | 92    |
| H2A  | 5860  | 6203 | 3567 | 108   |
| H2B  | 6059  | 7687 | 3495 | 108   |
| H2C  | 5484  | 6843 | 2888 | 108   |

Table S6. Crystal structural analysis data for **9****Table 1 Crystal data and structure refinement for 20201107-1**

|                                             |                                                    |
|---------------------------------------------|----------------------------------------------------|
| Identification code                         | 20201107-1                                         |
| Empirical formula                           | C <sub>10</sub> H <sub>18</sub> N <sub>2</sub> NaP |
| Formula weight                              | 220.22                                             |
| Temperature/K                               | 293(2)                                             |
| Crystal system                              | monoclinic                                         |
| Space group                                 | P2 <sub>1</sub> /c                                 |
| a/Å                                         | 6.1441(4)                                          |
| b/Å                                         | 12.5092(8)                                         |
| c/Å                                         | 16.6860(9)                                         |
| α/°                                         | 90.00                                              |
| β/°                                         | 99.250(6)                                          |
| γ/°                                         | 90.00                                              |
| Volume/Å <sup>3</sup>                       | 1265.77(13)                                        |
| Z                                           | 4                                                  |
| ρ <sub>calc</sub> /mg/mm <sup>3</sup>       | 1.156                                              |
| m/mm <sup>-1</sup>                          | 0.219                                              |
| F(000)                                      | 472.0                                              |
| Crystal size/mm <sup>3</sup>                | ? × ? × ?                                          |
| 2θ range for data collection                | 5.92 to 51.34°                                     |
| Index ranges                                | -7 ≤ h ≤ 7, -15 ≤ k ≤ 15, -20 ≤ l ≤ 20             |
| Reflections collected                       | 14238                                              |
| Independent reflections                     | 2407[R(int) = 0.0693]                              |
| Data/restraints/parameters                  | 2407/0/132                                         |
| Goodness-of-fit on F <sup>2</sup>           | 1.022                                              |
| Final R indexes [I ≥ 2σ (I)]                | R <sub>1</sub> = 0.0520, wR <sub>2</sub> = 0.1106  |
| Final R indexes [all data]                  | R <sub>1</sub> = 0.0897, wR <sub>2</sub> = 0.1309  |
| Largest diff. peak/hole / e Å <sup>-3</sup> | 0.22/-0.21                                         |

**Table 2 Fractional Atomic Coordinates (×10<sup>4</sup>) and Equivalent Isotropic Displacement Parameters (Å<sup>2</sup>×10<sup>3</sup>) for 20201107-1. U<sub>eq</sub> is defined as 1/3 of the trace of the orthogonalised U<sub>ij</sub> tensor.**

| Atom | x       | y          | z          | U(eq)    |
|------|---------|------------|------------|----------|
| C1   | -303(6) | 4300(3)    | 1943(2)    | 90.6(12) |
| C2   | 123(7)  | 6095(3)    | 2579(2)    | 96.2(13) |
| C3   | 3177(6) | 5302(3)    | 1979(2)    | 98.5(14) |
| C4   | 1299(5) | 5056(2)    | 2447.4(17) | 48.6(7)  |
| C5   | 2202(4) | 4504.9(19) | 3245.2(16) | 39.9(6)  |
| C6   | 3729(4) | 3413(2)    | 4393.5(15) | 39.2(6)  |

|     |             |            |            |          |
|-----|-------------|------------|------------|----------|
| C7  | 4711(5)     | 2590(2)    | 5030.5(17) | 50.3(7)  |
| C8  | 4356(6)     | 2910(3)    | 5884.7(18) | 72.7(10) |
| C9  | 7211(5)     | 2480(3)    | 5027(2)    | 77.4(11) |
| C10 | 3584(6)     | 1516(2)    | 4807(2)    | 70.3(10) |
| N1  | 2221(4)     | 4098.6(18) | 4567.6(13) | 47.9(6)  |
| N2  | 1333(4)     | 4718.1(17) | 3903.5(14) | 47.4(6)  |
| Na1 | -2195.9(19) | 4874.9(10) | 4235.9(7)  | 63.9(4)  |
| P1  | 4218.7(12)  | 3490.4(6)  | 3384.1(5)  | 49.7(3)  |

**Table 3 Anisotropic Displacement Parameters ( $\text{\AA}^2 \times 10^3$ ) for 20201107-1. The Anisotropic displacement factor exponent takes the form:  $-2\pi^2[h^2a^*U_{11} + \dots + 2hka^*b^*U_{12}]$**

| Atom | $U_{11}$ | $U_{22}$ | $U_{33}$ | $U_{23}$ | $U_{13}$ | $U_{12}$ |
|------|----------|----------|----------|----------|----------|----------|
| C1   | 110(3)   | 88(3)    | 59(2)    | 0(2)     | -30(2)   | -11(2)   |
| C2   | 138(4)   | 76(2)    | 63(3)    | -1.1(19) | -19(2)   | 45(2)    |
| C3   | 93(3)    | 129(3)   | 76(3)    | 47(3)    | 19(2)    | 11(3)    |
| C4   | 54.6(17) | 48.2(16) | 39.8(17) | -3.0(14) | -1.9(14) | 5.2(14)  |
| C5   | 40.1(15) | 41.5(15) | 36.6(16) | -4.6(12) | 1.5(12)  | -1.4(11) |
| C6   | 39.4(14) | 40.3(15) | 37.0(15) | -4.2(12) | 3.5(12)  | -2.3(12) |
| C7   | 58.8(18) | 46.9(16) | 43.3(17) | 3.9(14)  | 2.2(14)  | 6.3(13)  |
| C8   | 104(3)   | 70(2)    | 41.3(19) | 8.2(16)  | 3.4(18)  | 10.5(19) |
| C9   | 64(2)    | 88(2)    | 75(3)    | 26(2)    | -6.1(18) | 20.2(18) |
| C10  | 94(3)    | 46.4(18) | 68(2)    | 1.1(16)  | 5.5(19)  | -4.2(17) |
| N1   | 55.1(14) | 50.1(14) | 39.7(14) | -3.3(11) | 11.3(11) | 6.5(11)  |
| N2   | 50.4(14) | 50.2(14) | 41.1(14) | -3.6(11) | 5.5(11)  | 12.6(11) |
| Na1  | 56.1(8)  | 82.5(9)  | 53.5(8)  | -20.5(6) | 10.3(6)  | 1.2(6)   |
| P1   | 52.7(5)  | 57.8(5)  | 39.1(5)  | -2.0(4)  | 8.8(4)   | 13.5(4)  |

**Table 4 Bond Lengths for 20201107-1.**

| Atom | Atom | Length/ $\text{\AA}$ | Atom | Atom             | Length/ $\text{\AA}$ |
|------|------|----------------------|------|------------------|----------------------|
| C1   | C4   | 1.518(4)             | C7   | C10              | 1.531(4)             |
| C2   | C4   | 1.521(4)             | C8   | Na1 <sup>1</sup> | 3.065(3)             |
| C3   | C4   | 1.525(4)             | N1   | N2               | 1.390(3)             |
| C4   | C5   | 1.522(4)             | N1   | Na1 <sup>1</sup> | 2.376(2)             |
| C5   | N2   | 1.324(3)             | N1   | Na1              | 2.851(2)             |
| C5   | P1   | 1.763(3)             | N2   | Na1              | 2.331(2)             |
| C6   | C7   | 1.532(4)             | Na1  | C8 <sup>1</sup>  | 3.065(3)             |
| C6   | N1   | 1.329(3)             | Na1  | N1 <sup>1</sup>  | 2.376(2)             |

|    |    |          |     |                  |            |
|----|----|----------|-----|------------------|------------|
| C6 | P1 | 1.761(3) | Na1 | Na1 <sup>1</sup> | 3.416(2)   |
| C7 | C8 | 1.529(4) | Na1 | P1 <sup>2</sup>  | 2.9776(14) |
| C7 | C9 | 1.543(4) | P1  | Na1 <sup>3</sup> | 2.9776(14) |

<sup>1</sup>-X,1-Y,1-Z; <sup>2</sup>-1+X,+Y,+Z; <sup>3</sup>1+X,+Y,+Z

**Table 5 Bond Angles for 20201107-1.**

| Atom | Atom | Atom             | Angle/°    | Atom             | Atom | Atom             | Angle/°    |
|------|------|------------------|------------|------------------|------|------------------|------------|
| C1   | C4   | C2               | 109.4(3)   | N2               | N1   | Na1 <sup>1</sup> | 108.29(15) |
| C1   | C4   | C3               | 108.6(3)   | Na1 <sup>1</sup> | N1   | Na1              | 81.06(7)   |
| C1   | C4   | C5               | 108.4(2)   | C5               | N2   | N1               | 113.0(2)   |
| C2   | C4   | C3               | 108.5(3)   | C5               | N2   | Na1              | 136.83(18) |
| C2   | C4   | C5               | 112.0(2)   | N1               | N2   | Na1              | 96.79(15)  |
| C5   | C4   | C3               | 109.9(2)   | C8 <sup>1</sup>  | Na1  | Na1 <sup>1</sup> | 104.36(8)  |
| C4   | C5   | P1               | 126.2(2)   | N1               | Na1  | C8 <sup>1</sup>  | 135.17(9)  |
| N2   | C5   | C4               | 119.7(2)   | N1 <sup>1</sup>  | Na1  | C8 <sup>1</sup>  | 60.35(8)   |
| N2   | C5   | P1               | 113.9(2)   | N1 <sup>1</sup>  | Na1  | N1               | 98.94(7)   |
| C7   | C6   | P1               | 126.29(19) | N1 <sup>1</sup>  | Na1  | Na1 <sup>1</sup> | 55.54(6)   |
| N1   | C6   | C7               | 119.5(2)   | N1               | Na1  | Na1 <sup>1</sup> | 43.40(5)   |
| N1   | C6   | P1               | 113.96(19) | N1 <sup>1</sup>  | Na1  | P1 <sup>2</sup>  | 127.68(7)  |
| C6   | C7   | C9               | 109.8(2)   | N1               | Na1  | P1 <sup>2</sup>  | 120.17(6)  |
| C8   | C7   | C6               | 111.8(2)   | N2               | Na1  | C8 <sup>1</sup>  | 118.04(10) |
| C8   | C7   | C9               | 108.6(3)   | N2               | Na1  | N1               | 28.95(7)   |
| C8   | C7   | C10              | 109.3(2)   | N2               | Na1  | N1 <sup>1</sup>  | 112.16(9)  |
| C10  | C7   | C6               | 107.9(2)   | N2               | Na1  | Na1 <sup>1</sup> | 62.09(7)   |
| C10  | C7   | C9               | 109.4(2)   | N2               | Na1  | P1 <sup>2</sup>  | 118.85(7)  |
| C7   | C8   | Na1 <sup>1</sup> | 107.48(17) | P1 <sup>2</sup>  | Na1  | C8 <sup>1</sup>  | 102.42(8)  |
| C6   | N1   | N2               | 112.6(2)   | P1 <sup>2</sup>  | Na1  | Na1 <sup>1</sup> | 147.63(7)  |
| C6   | N1   | Na1              | 148.51(18) | C5               | P1   | Na1 <sup>3</sup> | 95.42(9)   |
| C6   | N1   | Na1 <sup>1</sup> | 129.17(18) | C6               | P1   | C5               | 86.61(12)  |
| N2   | N1   | Na1              | 54.26(12)  | C6               | P1   | Na1 <sup>3</sup> | 78.61(9)   |

1-X,1-Y,1-Z; <sup>2</sup>-1+X,+Y,+Z; <sup>3</sup>1+X,+Y,+Z

**Table 6 Hydrogen Atom Coordinates (Å×10<sup>4</sup>) and Isotropic Displacement Parameters (Å<sup>2</sup>×10<sup>3</sup>) for 20201107-1.**

| Atom | x   | y    | z    | U(eq) |
|------|-----|------|------|-------|
| H1A  | 452 | 3655 | 1840 | 136   |



|      |       |      |      |     |
|------|-------|------|------|-----|
| H1B  | -887  | 4635 | 1436 | 136 |
| H1C  | -1488 | 4132 | 2233 | 136 |
| H2A  | -1175 | 5943 | 2811 | 144 |
| H2B  | -287  | 6453 | 2068 | 144 |
| H2C  | 1091  | 6546 | 2942 | 144 |
| H3A  | 4169  | 5805 | 2280 | 148 |
| H3B  | 2586  | 5601 | 1460 | 148 |
| H3C  | 3958  | 4655 | 1903 | 148 |
| H8A  | 2805  | 2977 | 5897 | 109 |
| H8B  | 5069  | 3582 | 6028 | 109 |
| H8C  | 4971  | 2372 | 6265 | 109 |
| H9A  | 7942  | 3128 | 5226 | 116 |
| H9B  | 7466  | 2348 | 4482 | 116 |
| H9C  | 7780  | 1894 | 5369 | 116 |
| H10A | 4188  | 984  | 5194 | 105 |
| H10B | 3828  | 1306 | 4275 | 105 |
| H10C | 2029  | 1582 | 4810 | 105 |

Table S7. Crystal structural analysis data for **10**

**Table 1 Crystal data and structure refinement for 11**

|                                       |                                                                                |
|---------------------------------------|--------------------------------------------------------------------------------|
| Identification code                   | 11                                                                             |
| Empirical formula                     | C <sub>22</sub> H <sub>42</sub> N <sub>2</sub> O <sub>6</sub> PKS <sub>2</sub> |
| Formula weight                        | 564.77                                                                         |
| Temperature/K                         | 230.01(10)                                                                     |
| Crystal system                        | orthorhombic                                                                   |
| Space group                           | Pnma                                                                           |
| a/Å                                   | 17.2868(5)                                                                     |
| b/Å                                   | 13.3235(3)                                                                     |
| c/Å                                   | 13.0097(3)                                                                     |
| α/°                                   | 90.00                                                                          |
| β/°                                   | 90.00                                                                          |
| γ/°                                   | 90.00                                                                          |
| Volume/Å <sup>3</sup>                 | 2996.40(13)                                                                    |
| Z                                     | 4                                                                              |
| ρ <sub>calc</sub> /mg/mm <sup>3</sup> | 1.252                                                                          |
| m/mm <sup>-1</sup>                    | 3.657                                                                          |
| F(000)                                | 1208.0                                                                         |
| Crystal size/mm <sup>3</sup>          | 0.27 × 0.21 × 0.08                                                             |
| 2θ range for data collection          | 8.5 to 141.84°                                                                 |
| Index ranges                          | -19 ≤ h ≤ 21, -16 ≤ k ≤ 15, -7 ≤ l ≤ 15                                        |

Reflections collected 7656  
 Independent reflections 2981[R(int) = 0.0248]  
 Data/restraints/parameters 2981/24/256  
 Goodness-of-fit on F<sup>2</sup> 1.054  
 Final R indexes [I>=2σ (I)] R<sub>1</sub> = 0.0463, wR<sub>2</sub> = 0.1191  
 Final R indexes [all data] R<sub>1</sub> = 0.0545, wR<sub>2</sub> = 0.1274  
 Largest diff. peak/hole / e Å<sup>-3</sup> 0.71/-0.32

**Table 2 Fractional Atomic Coordinates (×10<sup>4</sup>) and Equivalent Isotropic Displacement Parameters (Å<sup>2</sup>×10<sup>3</sup>) for 11. U<sub>eq</sub> is defined as 1/3 of the trace of the orthogonalised U<sub>ij</sub> tensor.**

| Atom | x          | y        | z         | U(eq)    |
|------|------------|----------|-----------|----------|
| C1   | 6061(2)    | 2500     | 6999(4)   | 56.6(10) |
| C2   | 6861(2)    | 3450(3)  | 8251(3)   | 68.2(9)  |
| C3   | 6822(2)    | 2500     | 7592(3)   | 41.1(8)  |
| C4   | 7520.2(19) | 2500     | 6870(3)   | 32.4(7)  |
| C5   | 8578(2)    | 2500     | 5558(3)   | 38.6(8)  |
| C6   | 9151(2)    | 2500     | 4677(3)   | 67.2(14) |
| C7   | 9394(5)    | 3647(5)  | 4595(7)   | 116(3)   |
| C8   | 8799(4)    | 2230(5)  | 3658(4)   | 69(2)    |
| C9   | 9858(4)    | 1916(5)  | 4895(6)   | 93(3)    |
| C10  | 4248(6)    | 3833(8)  | 4650(6)   | 59(3)    |
| C11  | 4437(4)    | 4561(6)  | 3727(7)   | 63.1(18) |
| C12  | 5389(6)    | 5127(9)  | 2625(9)   | 62(3)    |
| C13  | 6239(6)    | 4992(5)  | 2364(6)   | 65.1(19) |
| C14  | 6898(7)    | 3833(10) | 1256(7)   | 68(3)    |
| C15  | 7147(4)    | 2881(6)  | 1129(7)   | 74(2)    |
| C16  | 7124(6)    | 1156(10) | 1715(9)   | 73(3)    |
| C17  | 6675(5)    | 384(7)   | 1995(7)   | 69.3(19) |
| C18  | 5650(7)    | -210(10) | 2968(11)  | 75(3)    |
| C19  | 4867(7)    | 59(7)    | 3356(7)   | 81(3)    |
| C20  | 4174(7)    | 1180(12) | 4284(9)   | 77(2)    |
| C21  | 4246(4)    | 2103(6)  | 4989(6)   | 77(2)    |
| K1   | 5909.4(4)  | 2500     | 3381.4(6) | 39.2(2)  |
| N1   | 8818.7(17) | 2500     | 6482(2)   | 40.8(7)  |
| N2   | 8201.5(17) | 2500     | 7255(2)   | 38.7(7)  |
| O1   | 5907(3)    | 569(4)   | 2333(4)   | 57.8(10) |
| O2   | 6335(3)    | 4022(3)  | 1964(4)   | 51.2(9)  |
| O3   | 5194(3)    | 4443(4)  | 3396(4)   | 63.4(12) |
| O4   | 4895(3)    | 931(4)   | 3968(4)   | 60.3(11) |
| O5   | 4336(3)    | 2850(3)  | 4220(4)   | 72.8(14) |

|    |           |           |           |          |
|----|-----------|-----------|-----------|----------|
| O6 | 6942(2)   | 2091(3)   | 1786(3)   | 55.1(10) |
| P1 | 7515.3(5) | 2500      | 5465.7(6) | 32.7(2)  |
| S1 | 7121.4(4) | 3788.6(5) | 4926.8(5) | 47.7(2)  |

**Table 3 Anisotropic Displacement Parameters ( $\text{\AA}^2 \times 10^3$ ) for 11. The Anisotropic displacement factor exponent takes the form:  $-2\pi^2[h^2a^2U_{11} + \dots + 2hka \times b \times U_{12}]$**

| Atom | $U_{11}$ | $U_{22}$ | $U_{33}$ | $U_{23}$  | $U_{13}$ | $U_{12}$ |
|------|----------|----------|----------|-----------|----------|----------|
| C1   | 40(2)    | 66(3)    | 64(3)    | 0         | 6.4(19)  | 0        |
| C2   | 63.1(19) | 76(2)    | 65.4(19) | -27.3(18) | 19.9(16) | -2.4(18) |
| C3   | 40.4(18) | 44.2(19) | 38.7(18) | 0         | 8.8(15)  | 0        |
| C4   | 36.1(17) | 29.1(15) | 32.0(16) | 0         | 0.1(13)  | 0        |
| C5   | 34.4(17) | 44.9(19) | 36.7(18) | 0         | -0.2(14) | 0        |
| C6   | 44(2)    | 109(4)   | 48(2)    | 0         | 13.2(19) | 0        |
| C7   | 115(5)   | 123(5)   | 110(5)   | 13(4)     | 41(4)    | -22(4)   |
| C8   | 68(3)    | 89(5)    | 50(3)    | -6(3)     | 14(2)    | 1(3)     |
| C9   | 64(4)    | 129(5)   | 86(4)    | -5(4)     | 15(3)    | 23(4)    |
| C10  | 53(4)    | 75(6)    | 49(5)    | -28(5)    | -2(4)    | 6(3)     |
| C11  | 53(4)    | 45(4)    | 91(5)    | -20(4)    | -8(4)    | 16(4)    |
| C12  | 66(7)    | 34(4)    | 86(7)    | -1(4)     | -13(5)   | 9(4)     |
| C13  | 78(5)    | 37(3)    | 80(5)    | 11(3)     | -11(4)   | -18(4)   |
| C14  | 76(7)    | 64(5)    | 64(6)    | 19(5)     | 13(4)    | -11(5)   |
| C15  | 65(4)    | 83(5)    | 75(5)    | 7(4)      | 25(4)    | -2(3)    |
| C16  | 51(5)    | 69(5)    | 99(9)    | -28(7)    | 24(5)    | 13(4)    |
| C17  | 76(5)    | 52(4)    | 80(5)    | -6(4)     | 9(4)     | 12(5)    |
| C18  | 88(9)    | 38(4)    | 98(9)    | 5(5)      | -2(6)    | -4(6)    |
| C19  | 87(6)    | 55(5)    | 100(7)   | 9(4)      | -13(6)   | -37(5)   |
| C20  | 54(3)    | 107(6)   | 71(4)    | 38(4)     | 11(3)    | -12(3)   |
| C21  | 54(3)    | 107(6)   | 71(4)    | 38(4)     | 11(3)    | -12(3)   |
| K1   | 38.1(4)  | 35.8(4)  | 43.7(4)  | 0         | 1.5(3)   | 0        |
| N1   | 32.6(14) | 51.4(17) | 38.3(15) | 0         | -1.1(12) | 0        |
| N2   | 39.5(15) | 44.1(16) | 32.6(14) | 0         | -3.4(12) | 0        |
| O1   | 63(3)    | 45(3)    | 66(3)    | 0(2)      | -9(2)    | -4(3)    |
| O2   | 49(2)    | 36(2)    | 69(3)    | 9(2)      | 0(2)     | -5(2)    |
| O3   | 47(3)    | 44(3)    | 100(4)   | 4(3)      | -3(3)    | 15(2)    |
| O4   | 40(2)    | 62(3)    | 79(3)    | 12(3)     | -3(2)    | -15(2)   |
| O5   | 68(3)    | 70(3)    | 80(3)    | 0(2)      | 11(2)    | 13(2)    |
| O6   | 57(2)    | 54(2)    | 54(2)    | 0.7(18)   | 13(2)    | 7.0(18)  |
| P1   | 33.9(4)  | 34.9(4)  | 29.4(4)  | 0         | -4.0(3)  | 0        |
| S1   | 57.8(4)  | 37.6(3)  | 47.7(4)  | 6.2(3)    | -12.7(3) | 3.2(3)   |

**Table 4 Bond Lengths for 11.**

| Atom | Atom             | Length/Å  | Atom | Atom             | Length/Å  |
|------|------------------|-----------|------|------------------|-----------|
| C1   | C3               | 1.526(6)  | C17  | C14 <sup>1</sup> | 1.471(16) |
| C2   | C3               | 1.530(4)  | C17  | O1               | 1.419(9)  |
| C3   | C2 <sup>1</sup>  | 1.530(4)  | C17  | O2 <sup>1</sup>  | 0.987(8)  |
| C3   | C4               | 1.529(5)  | C18  | C12 <sup>1</sup> | 0.644(11) |
| C4   | N2               | 1.280(4)  | C18  | C13 <sup>1</sup> | 1.318(17) |
| C4   | P1               | 1.827(3)  | C18  | C19              | 1.490(17) |
| C5   | C6               | 1.515(5)  | C18  | O1               | 1.398(14) |
| C5   | N1               | 1.272(5)  | C18  | O3 <sup>1</sup>  | 1.406(15) |
| C5   | P1               | 1.841(4)  | C19  | C11 <sup>1</sup> | 1.020(11) |
| C6   | C7 <sup>1</sup>  | 1.589(7)  | C19  | C12 <sup>1</sup> | 1.334(18) |
| C6   | C7               | 1.589(7)  | C19  | O3 <sup>1</sup>  | 0.874(8)  |
| C6   | C8 <sup>1</sup>  | 1.503(6)  | C19  | O4               | 1.409(11) |
| C6   | C8               | 1.503(6)  | C20  | C10 <sup>1</sup> | 0.493(12) |
| C6   | C9               | 1.475(6)  | C20  | C11 <sup>1</sup> | 1.307(17) |
| C6   | C9 <sup>1</sup>  | 1.475(6)  | C20  | C21              | 1.539(18) |
| C7   | C8 <sup>1</sup>  | 1.977(11) | C20  | O4               | 1.354(14) |
| C7   | C9 <sup>1</sup>  | 1.165(12) | C20  | O5 <sup>1</sup>  | 1.325(15) |
| C8   | C7 <sup>1</sup>  | 1.977(11) | C21  | C10 <sup>1</sup> | 1.323(12) |
| C8   | C8 <sup>1</sup>  | 0.720(13) | C21  | C21 <sup>1</sup> | 1.057(17) |
| C9   | C7 <sup>1</sup>  | 1.165(12) | C21  | O5               | 1.420(7)  |
| C9   | C9 <sup>1</sup>  | 1.555(14) | C21  | O5 <sup>1</sup>  | 1.015(8)  |
| C10  | C11              | 1.577(14) | K1   | O1               | 2.912(5)  |
| C10  | C20 <sup>1</sup> | 0.493(12) | K1   | O1 <sup>1</sup>  | 2.912(5)  |
| C10  | C21 <sup>1</sup> | 1.323(12) | K1   | O2 <sup>1</sup>  | 2.838(4)  |
| C10  | O4 <sup>1</sup>  | 1.461(11) | K1   | O2               | 2.838(4)  |
| C10  | O5               | 1.432(11) | K1   | O3 <sup>1</sup>  | 2.869(5)  |
| C11  | C19 <sup>1</sup> | 1.020(11) | K1   | O3               | 2.869(5)  |
| C11  | C20 <sup>1</sup> | 1.307(17) | K1   | O4               | 2.834(4)  |
| C11  | O3               | 1.386(9)  | K1   | O4 <sup>1</sup>  | 2.834(4)  |
| C11  | O4 <sup>1</sup>  | 1.073(8)  | K1   | O5               | 2.967(5)  |
| C12  | C13              | 1.520(16) | K1   | O5 <sup>1</sup>  | 2.967(5)  |
| C12  | C18 <sup>1</sup> | 0.644(11) | K1   | O6 <sup>1</sup>  | 2.791(4)  |
| C12  | C19 <sup>1</sup> | 1.334(18) | K1   | O6               | 2.791(4)  |
| C12  | O1 <sup>1</sup>  | 1.344(13) | N1   | N2               | 1.467(4)  |
| C12  | O3               | 1.397(15) | O1   | C12 <sup>1</sup> | 1.344(13) |
| C13  | C17 <sup>1</sup> | 1.023(10) | O1   | C13 <sup>1</sup> | 0.943(7)  |
| C13  | C18 <sup>1</sup> | 1.318(17) | O1   | O2 <sup>1</sup>  | 1.037(6)  |

|     |                  |           |    |                  |           |
|-----|------------------|-----------|----|------------------|-----------|
| C13 | O1 <sup>1</sup>  | 0.943(7)  | O2 | C16 <sup>1</sup> | 1.423(12) |
| C13 | O2               | 1.403(8)  | O2 | C17 <sup>1</sup> | 0.987(8)  |
| C14 | C15              | 1.349(15) | O2 | O1 <sup>1</sup>  | 1.037(6)  |
| C14 | C16 <sup>1</sup> | 0.713(12) | O3 | C18 <sup>1</sup> | 1.406(15) |
| C14 | C17 <sup>1</sup> | 1.471(16) | O3 | C19 <sup>1</sup> | 0.874(8)  |
| C14 | O2               | 1.364(13) | O3 | O4 <sup>1</sup>  | 1.034(6)  |
| C14 | O6 <sup>1</sup>  | 1.413(12) | O4 | C10 <sup>1</sup> | 1.461(11) |
| C15 | C15 <sup>1</sup> | 1.015(15) | O4 | C11 <sup>1</sup> | 1.073(8)  |
| C15 | C16 <sup>1</sup> | 1.492(16) | O4 | O3 <sup>1</sup>  | 1.034(6)  |
| C15 | O6               | 1.402(8)  | O5 | C20 <sup>1</sup> | 1.325(15) |
| C15 | O6 <sup>1</sup>  | 0.927(8)  | O5 | C21 <sup>1</sup> | 1.015(8)  |
| C16 | C14 <sup>1</sup> | 0.713(12) | O5 | O5 <sup>1</sup>  | 0.933(9)  |
| C16 | C15 <sup>1</sup> | 1.492(16) | O6 | C14 <sup>1</sup> | 1.413(12) |
| C16 | C17              | 1.341(16) | O6 | C15 <sup>1</sup> | 0.927(8)  |
| C16 | O2 <sup>1</sup>  | 1.423(12) | O6 | O6 <sup>1</sup>  | 1.090(8)  |
| C16 | O6               | 1.288(13) | P1 | S1 <sup>1</sup>  | 1.9755(8) |
| C17 | C13 <sup>1</sup> | 1.023(10) | P1 | S1               | 1.9755(8) |

1+X,1/2-Y,+Z

**Table 5 Bond Angles for 11.**

| Atom            | Atom | Atom            | Angle/°  | Atom            | Atom | Atom            | Angle/°    |
|-----------------|------|-----------------|----------|-----------------|------|-----------------|------------|
| C1              | C3   | C2 <sup>1</sup> | 108.7(2) | O1              | K1   | O5              | 108.05(14) |
| C1              | C3   | C2              | 108.7(2) | O1              | K1   | O5 <sup>1</sup> | 91.84(14)  |
| C1              | C3   | C4              | 111.7(3) | O1 <sup>1</sup> | K1   | O5 <sup>1</sup> | 108.05(14) |
| C2              | C3   | C2 <sup>1</sup> | 111.7(4) | O2              | K1   | O1 <sup>1</sup> | 20.73(11)  |
| C4              | C3   | C2              | 108.0(2) | O2 <sup>1</sup> | K1   | O1 <sup>1</sup> | 109.11(16) |
| C4              | C3   | C2 <sup>1</sup> | 108.0(2) | O2 <sup>1</sup> | K1   | O1              | 20.73(11)  |
| C3              | C4   | P1              | 127.6(3) | O2              | K1   | O1              | 109.11(16) |
| N2              | C4   | C3              | 119.1(3) | O2              | K1   | O2 <sup>1</sup> | 91.2(2)    |
| N2              | C4   | P1              | 113.3(3) | O2 <sup>1</sup> | K1   | O3              | 139.52(15) |
| C6              | C5   | P1              | 127.1(3) | O2              | K1   | O3              | 58.09(16)  |
| N1              | C5   | C6              | 120.1(3) | O2              | K1   | O3 <sup>1</sup> | 139.52(15) |
| N1              | C5   | P1              | 112.8(3) | O2 <sup>1</sup> | K1   | O3 <sup>1</sup> | 58.09(16)  |
| C5              | C6   | C7 <sup>1</sup> | 102.9(4) | O2 <sup>1</sup> | K1   | O5              | 126.07(14) |
| C5              | C6   | C7              | 102.9(4) | O2              | K1   | O5 <sup>1</sup> | 126.07(14) |
| C7              | C6   | C7 <sup>1</sup> | 148.3(7) | O2 <sup>1</sup> | K1   | O5 <sup>1</sup> | 111.36(14) |
| C8              | C6   | C5              | 113.7(4) | O2              | K1   | O5              | 111.36(14) |
| C8 <sup>1</sup> | C6   | C5              | 113.7(4) | O3              | K1   | O1              | 143.10(14) |

|                  |     |                  |           |                 |    |                 |            |
|------------------|-----|------------------|-----------|-----------------|----|-----------------|------------|
| C8 <sup>1</sup>  | C6  | C7 <sup>1</sup>  | 106.2(3)  | O3 <sup>1</sup> | K1 | O1              | 37.37(16)  |
| C8               | C6  | C7 <sup>1</sup>  | 79.5(4)   | O3 <sup>1</sup> | K1 | O1 <sup>1</sup> | 143.10(14) |
| C8 <sup>1</sup>  | C6  | C7               | 79.5(4)   | O3              | K1 | O1 <sup>1</sup> | 37.37(16)  |
| C8               | C6  | C7               | 106.2(3)  | O3 <sup>1</sup> | K1 | O3              | 128.9(2)   |
| C8 <sup>1</sup>  | C6  | C8               | 27.7(5)   | O3              | K1 | O5              | 57.35(14)  |
| C9               | C6  | C5               | 113.3(4)  | O3 <sup>1</sup> | K1 | O5 <sup>1</sup> | 57.35(14)  |
| C9 <sup>1</sup>  | C6  | C5               | 113.3(4)  | O3 <sup>1</sup> | K1 | O5              | 75.18(14)  |
| C9 <sup>1</sup>  | C6  | C7               | 44.5(5)   | O3              | K1 | O5 <sup>1</sup> | 75.18(14)  |
| C9               | C6  | C7               | 107.5(3)  | O4 <sup>1</sup> | K1 | O1              | 141.02(14) |
| C9               | C6  | C7 <sup>1</sup>  | 44.5(5)   | O4              | K1 | O1 <sup>1</sup> | 141.02(14) |
| C9 <sup>1</sup>  | C6  | C7 <sup>1</sup>  | 107.5(3)  | O4 <sup>1</sup> | K1 | O1 <sup>1</sup> | 58.22(16)  |
| C9               | C6  | C8               | 112.2(3)  | O4              | K1 | O1              | 58.22(16)  |
| C9               | C6  | C8 <sup>1</sup>  | 129.1(5)  | O4 <sup>1</sup> | K1 | O2 <sup>1</sup> | 149.62(14) |
| C9 <sup>1</sup>  | C6  | C8 <sup>1</sup>  | 112.2(3)  | O4              | K1 | O2              | 149.62(14) |
| C9 <sup>1</sup>  | C6  | C8               | 129.1(5)  | O4 <sup>1</sup> | K1 | O2              | 78.95(16)  |
| C9 <sup>1</sup>  | C6  | C9               | 63.6(6)   | O4              | K1 | O2 <sup>1</sup> | 78.95(16)  |
| C6               | C7  | C8 <sup>1</sup>  | 48.3(3)   | O4 <sup>1</sup> | K1 | O3              | 20.88(12)  |
| C9 <sup>1</sup>  | C7  | C6               | 62.6(4)   | O4              | K1 | O3              | 113.39(19) |
| C9 <sup>1</sup>  | C7  | C8 <sup>1</sup>  | 100.6(5)  | O4              | K1 | O3 <sup>1</sup> | 20.88(12)  |
| C6               | C8  | C7 <sup>1</sup>  | 52.2(2)   | O4 <sup>1</sup> | K1 | O3 <sup>1</sup> | 113.40(19) |
| C8 <sup>1</sup>  | C8  | C6               | 76.1(2)   | O4              | K1 | O4 <sup>1</sup> | 95.1(2)    |
| C8 <sup>1</sup>  | C8  | C7 <sup>1</sup>  | 126.2(2)  | O4 <sup>1</sup> | K1 | O5              | 38.53(15)  |
| C6               | C9  | C9 <sup>1</sup>  | 58.2(3)   | O4              | K1 | O5 <sup>1</sup> | 38.53(14)  |
| C7 <sup>1</sup>  | C9  | C6               | 72.9(4)   | O4 <sup>1</sup> | K1 | O5 <sup>1</sup> | 56.61(15)  |
| C7 <sup>1</sup>  | C9  | C9 <sup>1</sup>  | 130.1(3)  | O4              | K1 | O5              | 56.61(15)  |
| C20 <sup>1</sup> | C10 | C11              | 49(3)     | O5 <sup>1</sup> | K1 | O5              | 18.09(18)  |
| C20 <sup>1</sup> | C10 | C21 <sup>1</sup> | 107(3)    | O6              | K1 | O1              | 58.68(14)  |
| C20 <sup>1</sup> | C10 | O4 <sup>1</sup>  | 68(2)     | O6 <sup>1</sup> | K1 | O1              | 79.93(13)  |
| C20 <sup>1</sup> | C10 | O5               | 68(3)     | O6 <sup>1</sup> | K1 | O1 <sup>1</sup> | 58.68(14)  |
| C21 <sup>1</sup> | C10 | C11              | 146.5(7)  | O6              | K1 | O1 <sup>1</sup> | 79.93(13)  |
| C21 <sup>1</sup> | C10 | O4 <sup>1</sup>  | 114.1(8)  | O6              | K1 | O2 <sup>1</sup> | 37.96(13)  |
| C21 <sup>1</sup> | C10 | O5               | 43.0(5)   | O6 <sup>1</sup> | K1 | O2 <sup>1</sup> | 59.37(13)  |
| O4 <sup>1</sup>  | C10 | C11              | 41.2(4)   | O6              | K1 | O2              | 59.37(13)  |
| O5               | C10 | C11              | 104.1(5)  | O6 <sup>1</sup> | K1 | O2              | 37.96(13)  |
| O5               | C10 | O4 <sup>1</sup>  | 83.0(5)   | O6 <sup>1</sup> | K1 | O3              | 96.00(15)  |
| C19 <sup>1</sup> | C11 | C10              | 144.7(10) | O6              | K1 | O3              | 117.18(15) |
| C19 <sup>1</sup> | C11 | C20 <sup>1</sup> | 153.0(11) | O6 <sup>1</sup> | K1 | O3 <sup>1</sup> | 117.18(15) |
| C19 <sup>1</sup> | C11 | O3               | 39.0(5)   | O6              | K1 | O3 <sup>1</sup> | 96.00(15)  |
| C19 <sup>1</sup> | C11 | O4 <sup>1</sup>  | 84.6(8)   | O6              | K1 | O4              | 116.88(15) |
| C20 <sup>1</sup> | C11 | C10              | 16.5(6)   | O6 <sup>1</sup> | K1 | O4 <sup>1</sup> | 116.88(15) |

|                  |     |                  |           |                  |    |                  |            |
|------------------|-----|------------------|-----------|------------------|----|------------------|------------|
| C20 <sup>1</sup> | C11 | O3               | 114.6(8)  | O6               | K1 | O4 <sup>1</sup>  | 137.74(15) |
| O3               | C11 | C10              | 111.3(7)  | O6 <sup>1</sup>  | K1 | O4               | 137.74(15) |
| O4 <sup>1</sup>  | C11 | C10              | 63.6(7)   | O6               | K1 | O5               | 152.90(14) |
| O4 <sup>1</sup>  | C11 | C20 <sup>1</sup> | 68.5(8)   | O6 <sup>1</sup>  | K1 | O5               | 145.98(14) |
| O4 <sup>1</sup>  | C11 | O3               | 47.7(4)   | O6               | K1 | O5 <sup>1</sup>  | 145.98(14) |
| C18 <sup>1</sup> | C12 | C13              | 60(2)     | O6 <sup>1</sup>  | K1 | O5 <sup>1</sup>  | 152.90(14) |
| C18 <sup>1</sup> | C12 | C19 <sup>1</sup> | 91(3)     | O6 <sup>1</sup>  | K1 | O6               | 22.51(17)  |
| C18 <sup>1</sup> | C12 | O1 <sup>1</sup>  | 81(2)     | C5               | N1 | N2               | 114.2(3)   |
| C18 <sup>1</sup> | C12 | O3               | 78(2)     | C4               | N2 | N1               | 113.7(3)   |
| C19 <sup>1</sup> | C12 | C13              | 142.4(10) | C12 <sup>1</sup> | O1 | C17              | 126.2(9)   |
| C19 <sup>1</sup> | C12 | O1 <sup>1</sup>  | 121.6(10) | C12 <sup>1</sup> | O1 | C18              | 27.1(5)    |
| C19 <sup>1</sup> | C12 | O3               | 37.2(5)   | C12 <sup>1</sup> | O1 | K1               | 118.5(6)   |
| O1 <sup>1</sup>  | C12 | C13              | 37.8(4)   | C13 <sup>1</sup> | O1 | C12 <sup>1</sup> | 81.2(9)    |
| O1 <sup>1</sup>  | C12 | O3               | 85.0(7)   | C13 <sup>1</sup> | O1 | C17              | 46.1(6)    |
| O3               | C12 | C13              | 108.5(8)  | C13 <sup>1</sup> | O1 | C18              | 65.2(9)    |
| C17 <sup>1</sup> | C13 | C12              | 151.0(11) | C13 <sup>1</sup> | O1 | K1               | 132.8(6)   |
| C17 <sup>1</sup> | C13 | C18 <sup>1</sup> | 162.8(11) | C13 <sup>1</sup> | O1 | O2 <sup>1</sup>  | 90.1(7)    |
| C17 <sup>1</sup> | C13 | O2               | 44.7(6)   | C17              | O1 | K1               | 107.3(5)   |
| C18 <sup>1</sup> | C13 | C12              | 25.0(6)   | C18              | O1 | C17              | 110.6(9)   |
| C18 <sup>1</sup> | C13 | O2               | 121.0(9)  | C18              | O1 | K1               | 112.3(7)   |
| O1 <sup>1</sup>  | C13 | C12              | 61.0(8)   | O2 <sup>1</sup>  | O1 | C12 <sup>1</sup> | 165.8(8)   |
| O1 <sup>1</sup>  | C13 | C17 <sup>1</sup> | 92.3(8)   | O2 <sup>1</sup>  | O1 | C17              | 44.1(4)    |
| O1 <sup>1</sup>  | C13 | C18 <sup>1</sup> | 74.3(9)   | O2 <sup>1</sup>  | O1 | C18              | 152.9(8)   |
| O1 <sup>1</sup>  | C13 | O2               | 47.6(5)   | O2 <sup>1</sup>  | O1 | K1               | 75.6(4)    |
| O2               | C13 | C12              | 107.8(8)  | C13              | O2 | C16 <sup>1</sup> | 110.6(8)   |
| C15              | C14 | C17 <sup>1</sup> | 146.2(9)  | C13              | O2 | K1               | 112.7(5)   |
| C15              | C14 | O2               | 119.0(9)  | C14              | O2 | C13              | 120.3(8)   |
| C15              | C14 | O6 <sup>1</sup>  | 39.1(5)   | C14              | O2 | C16 <sup>1</sup> | 29.6(5)    |
| C16 <sup>1</sup> | C14 | C15              | 87(2)     | C14              | O2 | K1               | 119.5(6)   |
| C16 <sup>1</sup> | C14 | C17 <sup>1</sup> | 65.4(19)  | C16 <sup>1</sup> | O2 | K1               | 106.1(5)   |
| C16 <sup>1</sup> | C14 | O2               | 79.8(17)  | C17 <sup>1</sup> | O2 | C13              | 46.8(5)    |
| C16 <sup>1</sup> | C14 | O6 <sup>1</sup>  | 65.2(16)  | C17 <sup>1</sup> | O2 | C14              | 75.6(8)    |
| O2               | C14 | C17 <sup>1</sup> | 40.5(5)   | C17 <sup>1</sup> | O2 | C16 <sup>1</sup> | 64.7(8)    |
| O2               | C14 | O6 <sup>1</sup>  | 82.5(6)   | C17 <sup>1</sup> | O2 | K1               | 134.5(6)   |
| O6 <sup>1</sup>  | C14 | C17 <sup>1</sup> | 108.3(7)  | C17 <sup>1</sup> | O2 | O1 <sup>1</sup>  | 89.0(6)    |
| C14              | C15 | C16 <sup>1</sup> | 28.5(5)   | O1 <sup>1</sup>  | O2 | C13              | 42.2(4)    |
| C14              | C15 | O6               | 123.4(7)  | O1 <sup>1</sup>  | O2 | C14              | 156.8(7)   |
| C15 <sup>1</sup> | C15 | C14              | 160.0(6)  | O1 <sup>1</sup>  | O2 | C16 <sup>1</sup> | 151.3(8)   |
| C15 <sup>1</sup> | C15 | C16 <sup>1</sup> | 149.2(5)  | O1 <sup>1</sup>  | O2 | K1               | 83.7(4)    |
| C15 <sup>1</sup> | C15 | O6               | 41.3(3)   | C11              | O3 | C12              | 112.1(8)   |

|                  |     |                  |           |                  |    |                  |          |
|------------------|-----|------------------|-----------|------------------|----|------------------|----------|
| O6 <sup>1</sup>  | C15 | C14              | 74.2(7)   | C11              | O3 | C18 <sup>1</sup> | 124.8(8) |
| O6 <sup>1</sup>  | C15 | C15 <sup>1</sup> | 92.3(6)   | C11              | O3 | K1               | 120.8(5) |
| O6 <sup>1</sup>  | C15 | C16 <sup>1</sup> | 58.9(6)   | C12              | O3 | C18 <sup>1</sup> | 26.6(5)  |
| O6               | C15 | C16 <sup>1</sup> | 109.1(7)  | C12              | O3 | K1               | 118.7(6) |
| O6 <sup>1</sup>  | C15 | O6               | 51.0(5)   | C18 <sup>1</sup> | O3 | K1               | 114.3(6) |
| C14 <sup>1</sup> | C16 | C15 <sup>1</sup> | 64.5(19)  | C19 <sup>1</sup> | O3 | C11              | 47.3(8)  |
| C14 <sup>1</sup> | C16 | C17              | 86(2)     | C19 <sup>1</sup> | O3 | C12              | 67.5(10) |
| C14 <sup>1</sup> | C16 | O2 <sup>1</sup>  | 70.6(16)  | C19 <sup>1</sup> | O3 | C18 <sup>1</sup> | 77.7(10) |
| C14 <sup>1</sup> | C16 | O6               | 84.7(19)  | C19 <sup>1</sup> | O3 | K1               | 164.6(8) |
| C17              | C16 | C15 <sup>1</sup> | 144.5(10) | C19 <sup>1</sup> | O3 | O4 <sup>1</sup>  | 94.9(9)  |
| C17              | C16 | O2 <sup>1</sup>  | 41.7(5)   | O4 <sup>1</sup>  | O3 | C11              | 50.1(5)  |
| O2 <sup>1</sup>  | C16 | C15 <sup>1</sup> | 106.6(8)  | O4 <sup>1</sup>  | O3 | C12              | 162.1(8) |
| O6               | C16 | C15 <sup>1</sup> | 38.1(5)   | O4 <sup>1</sup>  | O3 | C18 <sup>1</sup> | 156.3(8) |
| O6               | C16 | C17              | 125.5(8)  | O4 <sup>1</sup>  | O3 | K1               | 77.7(4)  |
| O6               | C16 | O2 <sup>1</sup>  | 84.9(6)   | C10 <sup>1</sup> | O4 | K1               | 118.5(5) |
| C13 <sup>1</sup> | C17 | C14 <sup>1</sup> | 147.9(11) | C11 <sup>1</sup> | O4 | C10 <sup>1</sup> | 75.2(7)  |
| C13 <sup>1</sup> | C17 | C16              | 158.4(11) | C11 <sup>1</sup> | O4 | C19              | 46.1(5)  |
| C13 <sup>1</sup> | C17 | O1               | 41.6(5)   | C11 <sup>1</sup> | O4 | C20              | 63.9(8)  |
| C16              | C17 | C14 <sup>1</sup> | 28.9(5)   | C11 <sup>1</sup> | O4 | K1               | 145.8(6) |
| C16              | C17 | O1               | 119.5(9)  | C19              | O4 | C10 <sup>1</sup> | 119.6(7) |
| O1               | C17 | C14 <sup>1</sup> | 109.0(8)  | C19              | O4 | K1               | 118.5(6) |
| O2 <sup>1</sup>  | C17 | C13 <sup>1</sup> | 88.5(8)   | C20              | O4 | C10 <sup>1</sup> | 19.7(5)  |
| O2 <sup>1</sup>  | C17 | C14 <sup>1</sup> | 63.9(8)   | C20              | O4 | C19              | 110.0(9) |
| O2 <sup>1</sup>  | C17 | C16              | 73.6(8)   | C20              | O4 | K1               | 118.0(7) |
| O2 <sup>1</sup>  | C17 | O1               | 46.9(4)   | O3 <sup>1</sup>  | O4 | C10 <sup>1</sup> | 157.4(7) |
| C12 <sup>1</sup> | C18 | C13 <sup>1</sup> | 95(2)     | O3 <sup>1</sup>  | O4 | C11 <sup>1</sup> | 82.2(7)  |
| C12 <sup>1</sup> | C18 | C19              | 64(2)     | O3 <sup>1</sup>  | O4 | C19              | 38.2(5)  |
| C12 <sup>1</sup> | C18 | O1               | 72(2)     | O3 <sup>1</sup>  | O4 | C20              | 142.9(8) |
| C12 <sup>1</sup> | C18 | O3 <sup>1</sup>  | 76(2)     | O3 <sup>1</sup>  | O4 | K1               | 81.5(4)  |
| C13 <sup>1</sup> | C18 | C19              | 148.4(11) | C10              | O5 | K1               | 112.6(5) |
| C13 <sup>1</sup> | C18 | O1               | 40.5(5)   | C20 <sup>1</sup> | O5 | C10              | 20.1(6)  |
| C13 <sup>1</sup> | C18 | O3 <sup>1</sup>  | 120.6(10) | C20 <sup>1</sup> | O5 | C21              | 128.0(8) |
| O1               | C18 | C19              | 108.1(9)  | C20 <sup>1</sup> | O5 | K1               | 111.7(6) |
| O1               | C18 | O3 <sup>1</sup>  | 82.7(7)   | C21              | O5 | C10              | 110.7(6) |
| O3 <sup>1</sup>  | C18 | C19              | 35.0(5)   | C21 <sup>1</sup> | O5 | C10              | 62.8(6)  |
| C11 <sup>1</sup> | C19 | C12 <sup>1</sup> | 157.2(11) | C21 <sup>1</sup> | O5 | C20 <sup>1</sup> | 81.1(8)  |
| C11 <sup>1</sup> | C19 | C18              | 160.3(12) | C21 <sup>1</sup> | O5 | C21              | 48.0(9)  |
| C11 <sup>1</sup> | C19 | O4               | 49.3(6)   | C21              | O5 | K1               | 104.4(4) |
| C12 <sup>1</sup> | C19 | C18              | 25.6(6)   | C21 <sup>1</sup> | O5 | K1               | 120.8(6) |
| C12 <sup>1</sup> | C19 | O4               | 122.2(10) | O5 <sup>1</sup>  | O5 | C10              | 156.1(4) |



|                  |     |                  |           |                  |    |                  |           |
|------------------|-----|------------------|-----------|------------------|----|------------------|-----------|
| O3 <sup>1</sup>  | C19 | C11 <sup>1</sup> | 93.8(10)  | O5 <sup>1</sup>  | O5 | C20 <sup>1</sup> | 167.2(6)  |
| O3 <sup>1</sup>  | C19 | C12 <sup>1</sup> | 75.3(11)  | O5 <sup>1</sup>  | O5 | C21              | 45.5(4)   |
| O3 <sup>1</sup>  | C19 | C18              | 67.3(10)  | O5 <sup>1</sup>  | O5 | C21 <sup>1</sup> | 93.5(6)   |
| O3 <sup>1</sup>  | C19 | O4               | 47.0(6)   | O5 <sup>1</sup>  | O5 | K1               | 80.95(9)  |
| O4               | C19 | C18              | 111.0(9)  | C14 <sup>1</sup> | O6 | K1               | 119.9(6)  |
| C10 <sup>1</sup> | C20 | C11 <sup>1</sup> | 115(3)    | C15 <sup>1</sup> | O6 | C14 <sup>1</sup> | 66.7(7)   |
| C10 <sup>1</sup> | C20 | C21              | 55(3)     | C15              | O6 | C14 <sup>1</sup> | 111.7(6)  |
| C10 <sup>1</sup> | C20 | O4               | 93(3)     | C15 <sup>1</sup> | O6 | C15              | 46.4(8)   |
| C10 <sup>1</sup> | C20 | O5 <sup>1</sup>  | 92(3)     | C15 <sup>1</sup> | O6 | C16              | 83.0(7)   |
| C11 <sup>1</sup> | C20 | C21              | 155.0(10) | C15              | O6 | K1               | 118.0(3)  |
| C11 <sup>1</sup> | C20 | O4               | 47.6(6)   | C15 <sup>1</sup> | O6 | K1               | 157.4(6)  |
| C11 <sup>1</sup> | C20 | O5 <sup>1</sup>  | 128.9(10) | C15 <sup>1</sup> | O6 | O6 <sup>1</sup>  | 87.7(6)   |
| O4               | C20 | C21              | 107.6(9)  | C16              | O6 | C14 <sup>1</sup> | 30.2(6)   |
| O5 <sup>1</sup>  | C20 | C21              | 40.6(5)   | C16              | O6 | C15              | 128.3(7)  |
| O5 <sup>1</sup>  | C20 | O4               | 91.5(8)   | C16              | O6 | K1               | 113.5(6)  |
| C10 <sup>1</sup> | C21 | C20              | 17.9(5)   | O6 <sup>1</sup>  | O6 | C14 <sup>1</sup> | 150.6(5)  |
| C10 <sup>1</sup> | C21 | O5               | 115.2(6)  | O6 <sup>1</sup>  | O6 | C15              | 41.3(3)   |
| C21 <sup>1</sup> | C21 | C10 <sup>1</sup> | 160.5(4)  | O6 <sup>1</sup>  | O6 | C16              | 165.2(5)  |
| C21 <sup>1</sup> | C21 | C20              | 143.0(5)  | O6 <sup>1</sup>  | O6 | K1               | 78.74(9)  |
| C21 <sup>1</sup> | C21 | O5               | 45.5(4)   | C4               | P1 | C5               | 86.01(15) |
| O5 <sup>1</sup>  | C21 | C10 <sup>1</sup> | 74.2(7)   | C4               | P1 | S1               | 110.88(5) |
| O5 <sup>1</sup>  | C21 | C20              | 58.2(6)   | C4               | P1 | S1 <sup>1</sup>  | 110.88(5) |
| O5               | C21 | C20              | 98.6(6)   | C5               | P1 | S1               | 111.54(5) |
| O5 <sup>1</sup>  | C21 | C21 <sup>1</sup> | 86.5(6)   | C5               | P1 | S1 <sup>1</sup>  | 111.54(5) |
| O5 <sup>1</sup>  | C21 | O5               | 41.0(5)   | S1               | P1 | S1 <sup>1</sup>  | 120.70(6) |
| O1 <sup>1</sup>  | K1  | O1               | 124.2(2)  | P1               | S1 | K1               | 89.04(3)  |
| O1 <sup>1</sup>  | K1  | O5               | 91.84(14) |                  |    |                  |           |

1+X,1/2-Y,+Z

**Table 6 Torsion Angles for 11.**

| A               | B  | C  | D               | Angle/°   | A               | B  | C  | D                | Angle/°   |
|-----------------|----|----|-----------------|-----------|-----------------|----|----|------------------|-----------|
| C1              | C3 | C4 | N2              | 180.0     | O2 <sup>1</sup> | K1 | O1 | C12 <sup>1</sup> | -178.0(8) |
| C1              | C3 | C4 | P1              | 0.0       | O2              | K1 | O1 | C13 <sup>1</sup> | 107.9(10) |
| C2 <sup>1</sup> | C3 | C4 | N2              | -60.5(2)  | O2 <sup>1</sup> | K1 | O1 | C13 <sup>1</sup> | 76.4(10)  |
| C2              | C3 | C4 | N2              | 60.5(2)   | O2 <sup>1</sup> | K1 | O1 | C17              | 31.0(5)   |
| C2              | C3 | C4 | P1              | -119.5(2) | O2              | K1 | O1 | C17              | 62.5(5)   |
| C2 <sup>1</sup> | C3 | C4 | P1              | 119.5(2)  | O2              | K1 | O1 | C18              | -175.8(6) |
| C3              | C4 | N2 | N1              | 180.0     | O2 <sup>1</sup> | K1 | O1 | C18              | 152.7(8)  |
| C3              | C4 | P1 | C5              | 180.0     | O2              | K1 | O1 | O2 <sup>1</sup>  | 31.5(3)   |
| C3              | C4 | P1 | S1 <sup>1</sup> | -68.46(6) | O2 <sup>1</sup> | K1 | O2 | C13              | -178.3(5) |

|                 |     |    |                  |             |                 |    |    |                  |            |
|-----------------|-----|----|------------------|-------------|-----------------|----|----|------------------|------------|
| C3              | C4  | P1 | S1               | 68.45(6)    | O2 <sup>1</sup> | K1 | O2 | C14              | -28.3(6)   |
| C4              | P1  | S1 | K1               | -130.35(11) | O2 <sup>1</sup> | K1 | O2 | C16 <sup>1</sup> | -57.1(6)   |
| C5              | C6  | C7 | C8 <sup>1</sup>  | -112.2(4)   | O2 <sup>1</sup> | K1 | O2 | C17 <sup>1</sup> | -127.2(9)  |
| C5              | C6  | C7 | C9 <sup>1</sup>  | 110.2(6)    | O2 <sup>1</sup> | K1 | O2 | O1 <sup>1</sup>  | 150.4(3)   |
| C5              | C6  | C8 | C7 <sup>1</sup>  | -99.6(4)    | O2 <sup>1</sup> | K1 | O3 | C11              | 104.4(6)   |
| C5              | C6  | C8 | C8 <sup>1</sup>  | 96.23(15)   | O2              | K1 | O3 | C11              | 150.7(6)   |
| C5              | C6  | C9 | C7 <sup>1</sup>  | 84.8(6)     | O2              | K1 | O3 | C12              | 5.0(5)     |
| C5              | C6  | C9 | C9 <sup>1</sup>  | -105.5(3)   | O2 <sup>1</sup> | K1 | O3 | C12              | -41.3(6)   |
| C5              | N1  | N2 | C4               | 0.0         | O2 <sup>1</sup> | K1 | O3 | C18 <sup>1</sup> | -70.6(6)   |
| C5              | P1  | S1 | K1               | 135.61(12)  | O2              | K1 | O3 | C18 <sup>1</sup> | -24.4(6)   |
| C6              | C5  | N1 | N2               | 180.0       | O2              | K1 | O3 | C19 <sup>1</sup> | 115(3)     |
| C6              | C5  | P1 | C4               | 180.0       | O2 <sup>1</sup> | K1 | O3 | C19 <sup>1</sup> | 69(4)      |
| C6              | C5  | P1 | S1 <sup>1</sup>  | 69.11(6)    | O2 <sup>1</sup> | K1 | O3 | O4 <sup>1</sup>  | 131.1(4)   |
| C6              | C5  | P1 | S1               | -69.11(6)   | O2              | K1 | O3 | O4 <sup>1</sup>  | 177.3(4)   |
| C7 <sup>1</sup> | C6  | C7 | C8 <sup>1</sup>  | 103.8(11)   | O2              | K1 | O4 | C10 <sup>1</sup> | -93.4(5)   |
| C7 <sup>1</sup> | C6  | C7 | C9 <sup>1</sup>  | -33.8(14)   | O2 <sup>1</sup> | K1 | O4 | C10 <sup>1</sup> | -166.5(4)  |
| C7              | C6  | C8 | C7 <sup>1</sup>  | 147.9(7)    | O2              | K1 | O4 | C11 <sup>1</sup> | 13.1(14)   |
| C7 <sup>1</sup> | C6  | C8 | C8 <sup>1</sup>  | -164.2(4)   | O2 <sup>1</sup> | K1 | O4 | C11 <sup>1</sup> | -60.0(12)  |
| C7              | C6  | C8 | C8 <sup>1</sup>  | -16.2(4)    | O2              | K1 | O4 | C19              | 65.9(7)    |
| C7              | C6  | C9 | C7 <sup>1</sup>  | -162.2(9)   | O2 <sup>1</sup> | K1 | O4 | C19              | -7.2(6)    |
| C7 <sup>1</sup> | C6  | C9 | C9 <sup>1</sup>  | 169.7(5)    | O2 <sup>1</sup> | K1 | O4 | C20              | -144.1(7)  |
| C7              | C6  | C9 | C9 <sup>1</sup>  | 7.5(4)      | O2              | K1 | O4 | C20              | -71.0(8)   |
| C8              | C6  | C7 | C8 <sup>1</sup>  | 7.6(2)      | O2              | K1 | O4 | O3 <sup>1</sup>  | 75.4(5)    |
| C8              | C6  | C7 | C9 <sup>1</sup>  | -130.0(6)   | O2 <sup>1</sup> | K1 | O4 | O3 <sup>1</sup>  | 2.3(4)     |
| C8 <sup>1</sup> | C6  | C7 | C9 <sup>1</sup>  | -137.6(7)   | O2 <sup>1</sup> | K1 | O5 | C10              | -161.7(4)  |
| C8 <sup>1</sup> | C6  | C8 | C7 <sup>1</sup>  | 164.2(4)    | O2              | K1 | O5 | C10              | -53.4(5)   |
| C8 <sup>1</sup> | C6  | C9 | C7 <sup>1</sup>  | -71.6(7)    | O2 <sup>1</sup> | K1 | O5 | C20 <sup>1</sup> | -140.0(6)  |
| C8              | C6  | C9 | C7 <sup>1</sup>  | -45.8(8)    | O2              | K1 | O5 | C20 <sup>1</sup> | -31.7(7)   |
| C8              | C6  | C9 | C9 <sup>1</sup>  | 123.9(5)    | O2 <sup>1</sup> | K1 | O5 | C21 <sup>1</sup> | 127.5(7)   |
| C8 <sup>1</sup> | C6  | C9 | C9 <sup>1</sup>  | 98.1(5)     | O2 <sup>1</sup> | K1 | O5 | C21              | 78.1(4)    |
| C9 <sup>1</sup> | C6  | C7 | C8 <sup>1</sup>  | 137.6(7)    | O2              | K1 | O5 | C21              | -173.7(4)  |
| C9              | C6  | C7 | C8 <sup>1</sup>  | 127.9(5)    | O2              | K1 | O5 | C21 <sup>1</sup> | -124.3(7)  |
| C9              | C6  | C7 | C9 <sup>1</sup>  | -9.7(5)     | O2 <sup>1</sup> | K1 | O5 | O5 <sup>1</sup>  | 38.82(13)  |
| C9              | C6  | C8 | C7 <sup>1</sup>  | 30.7(6)     | O2              | K1 | O5 | O5 <sup>1</sup>  | 147.04(11) |
| C9 <sup>1</sup> | C6  | C8 | C7 <sup>1</sup>  | 104.1(6)    | O2              | K1 | O6 | C14 <sup>1</sup> | -140.2(6)  |
| C9 <sup>1</sup> | C6  | C8 | C8 <sup>1</sup>  | -60.1(4)    | O2 <sup>1</sup> | K1 | O6 | C14 <sup>1</sup> | 2.8(6)     |
| C9              | C6  | C8 | C8 <sup>1</sup>  | -133.4(4)   | O2              | K1 | O6 | C15 <sup>1</sup> | -39.0(16)  |
| C9 <sup>1</sup> | C6  | C9 | C7 <sup>1</sup>  | -169.7(5)   | O2 <sup>1</sup> | K1 | O6 | C15              | 144.8(6)   |
| C10             | C11 | O3 | C12              | -176.0(7)   | O2              | K1 | O6 | C15              | 1.8(5)     |
| C10             | C11 | O3 | C18 <sup>1</sup> | -149.2(8)   | O2 <sup>1</sup> | K1 | O6 | C15 <sup>1</sup> | 104.0(17)  |

|                                           |            |                                          |             |
|-------------------------------------------|------------|------------------------------------------|-------------|
| C10 C11 O3 C19 <sup>1</sup>               | -155.8(12) | O2 <sup>1</sup> K1 O6 C16                | -30.4(6)    |
| C10 C11 O3 K1                             | 36.3(7)    | O2 K1 O6 C16                             | -173.4(6)   |
| C10 C11 O3 O4 <sup>1</sup>                | 1.5(6)     | O2 <sup>1</sup> K1 O6 O6 <sup>1</sup>    | 158.31(18)  |
| C10 <sup>1</sup> C20 C21 C21 <sup>1</sup> | 171(2)     | O2 K1 O6 O6 <sup>1</sup>                 | 15.31(13)   |
| C10 <sup>1</sup> C20 C21 O5 <sup>1</sup>  | 152(3)     | O2 <sup>1</sup> K1 S1 P1                 | -54.41(13)  |
| C10 <sup>1</sup> C20 C21 O5               | 159(3)     | O2 K1 S1 P1                              | -140.10(11) |
| C10 <sup>1</sup> C20 O4 C11 <sup>1</sup>  | 122(3)     | O3 C12 C13 C17 <sup>1</sup>              | 80(2)       |
| C10 <sup>1</sup> C20 O4 C19               | 123(3)     | O3 C12 C13 C18 <sup>1</sup>              | -63(2)      |
| C10 <sup>1</sup> C20 O4 K1                | -97(3)     | O3 C12 C13 O1 <sup>1</sup>               | 54.6(8)     |
| C10 <sup>1</sup> C20 O4 O3 <sup>1</sup>   | 148(2)     | O3 C12 C13 O2                            | 63.4(9)     |
| C10 <sup>1</sup> C21 O5 C10               | 174.2(10)  | O3 <sup>1</sup> C18 C19 C11 <sup>1</sup> | -16(3)      |
| C10 <sup>1</sup> C21 O5 C20 <sup>1</sup>  | 162.3(8)   | O3 <sup>1</sup> C18 C19 C12 <sup>1</sup> | 104(2)      |
| C10 <sup>1</sup> C21 O5 C21 <sup>1</sup>  | 176.9(5)   | O3 <sup>1</sup> C18 C19 O4               | -17.7(6)    |
| C10 <sup>1</sup> C21 O5 K1                | -64.4(8)   | O3 <sup>1</sup> C18 O1 C12 <sup>1</sup>  | -77(2)      |
| C10 <sup>1</sup> C21 O5 O5 <sup>1</sup>   | -3.1(5)    | O3 <sup>1</sup> C18 O1 C13 <sup>1</sup>  | 160.2(9)    |
| C11 C10 O5 C20 <sup>1</sup>               | -33(2)     | O3 <sup>1</sup> C18 O1 C17               | 151.8(6)    |
| C11 C10 O5 C21                            | 175.1(6)   | O3 <sup>1</sup> C18 O1 K1                | 31.9(7)     |
| C11 C10 O5 C21 <sup>1</sup>               | 172.8(9)   | O3 <sup>1</sup> C18 O1 O2 <sup>1</sup>   | 134.2(15)   |
| C11 C10 O5 K1                             | 58.6(7)    | O3 <sup>1</sup> C19 O4 C10 <sup>1</sup>  | 174.4(8)    |
| C11 C10 O5 O5 <sup>1</sup>                | 180.0(7)   | O3 <sup>1</sup> C19 O4 C11 <sup>1</sup>  | 156.9(12)   |
| C11 <sup>1</sup> C19 O4 C10 <sup>1</sup>  | 17.5(9)    | O3 <sup>1</sup> C19 O4 C20               | 155.4(9)    |
| C11 <sup>1</sup> C19 O4 C20               | -1.5(9)    | O3 <sup>1</sup> C19 O4 K1                | 15.3(9)     |
| C11 <sup>1</sup> C19 O4 K1                | -141.6(7)  | O3 <sup>1</sup> K1 O1 C12 <sup>1</sup>   | 4.2(5)      |
| C11 <sup>1</sup> C19 O4 O3 <sup>1</sup>   | -156.9(12) | O3 K1 O1 C12 <sup>1</sup>                | -84.6(6)    |
| C11 <sup>1</sup> C20 C21 C10 <sup>1</sup> | -74(3)     | O3 <sup>1</sup> K1 O1 C13 <sup>1</sup>   | -101.3(11)  |
| C11 <sup>1</sup> C20 C21 C21 <sup>1</sup> | 97(2)      | O3 K1 O1 C13 <sup>1</sup>                | 169.9(10)   |
| C11 <sup>1</sup> C20 C21 O5               | 85(2)      | O3 <sup>1</sup> K1 O1 C17                | -146.8(6)   |
| C11 <sup>1</sup> C20 C21 O5 <sup>1</sup>  | 78(2)      | O3 K1 O1 C17                             | 124.4(5)    |
| C11 <sup>1</sup> C20 O4 C10 <sup>1</sup>  | -122(3)    | O3 <sup>1</sup> K1 O1 C18                | -25.1(6)    |
| C11 <sup>1</sup> C20 O4 C19               | 1.2(8)     | O3 K1 O1 C18                             | -113.9(6)   |
| C11 <sup>1</sup> C20 O4 K1                | 141.5(6)   | O3 <sup>1</sup> K1 O1 O2 <sup>1</sup>    | -177.8(5)   |
| C11 <sup>1</sup> C20 O4 O3 <sup>1</sup>   | 26.4(13)   | O3 K1 O1 O2 <sup>1</sup>                 | 93.4(4)     |
| C12 C13 O2 C14                            | 149.7(8)   | O3 <sup>1</sup> K1 O2 C13                | 143.9(5)    |
| C12 C13 O2 C16 <sup>1</sup>               | -179.3(8)  | O3 K1 O2 C13                             | 29.7(5)     |
| C12 C13 O2 C17 <sup>1</sup>               | 168.8(12)  | O3 <sup>1</sup> K1 O2 C14                | -66.2(6)    |
| C12 C13 O2 K1                             | -60.7(7)   | O3 K1 O2 C14                             | 179.6(6)    |
| C12 C13 O2 O1 <sup>1</sup>                | -10.5(7)   | O3 K1 O2 C16 <sup>1</sup>                | 150.9(6)    |
| C12 <sup>1</sup> C18 C19 C11 <sup>1</sup> | -120(4)    | O3 <sup>1</sup> K1 O2 C16 <sup>1</sup>   | -94.9(6)    |
| C12 <sup>1</sup> C18 C19 O3 <sup>1</sup>  | -104(2)    | O3 K1 O2 C17 <sup>1</sup>                | 80.8(10)    |
| C12 <sup>1</sup> C18 C19 O4               | -121(2)    | O3 <sup>1</sup> K1 O2 C17 <sup>1</sup>   | -165.0(9)   |

|                                           |            |                                          |            |
|-------------------------------------------|------------|------------------------------------------|------------|
| C12 <sup>1</sup> C18 O1 C13 <sup>1</sup>  | -122(3)    | O3 K1 O2 O1 <sup>1</sup>                 | -1.6(4)    |
| C12 <sup>1</sup> C18 O1 C17               | -131(2)    | O3 <sup>1</sup> K1 O2 O1 <sup>1</sup>    | 112.6(4)   |
| C12 <sup>1</sup> C18 O1 K1                | 109(2)     | O3 <sup>1</sup> K1 O3 C11                | 20.2(7)    |
| C12 <sup>1</sup> C18 O1 O2 <sup>1</sup>   | -148.4(19) | O3 <sup>1</sup> K1 O3 C12                | -125.5(5)  |
| C12 <sup>1</sup> C19 O4 C10 <sup>1</sup>  | 171.1(8)   | O3 <sup>1</sup> K1 O3 C18 <sup>1</sup>   | -154.8(5)  |
| C12 <sup>1</sup> C19 O4 C11 <sup>1</sup>  | 153.6(14)  | O3 <sup>1</sup> K1 O3 C19 <sup>1</sup>   | -15(4)     |
| C12 <sup>1</sup> C19 O4 C20               | 152.1(10)  | O3 <sup>1</sup> K1 O3 O4 <sup>1</sup>    | 46.8(6)    |
| C12 <sup>1</sup> C19 O4 K1                | 12.0(11)   | O3 <sup>1</sup> K1 O4 C10 <sup>1</sup>   | -168.8(7)  |
| C12 <sup>1</sup> C19 O4 O3 <sup>1</sup>   | -3.3(8)    | O3 K1 O4 C10 <sup>1</sup>                | -27.0(5)   |
| C13 C12 O3 C11                            | 176.1(7)   | O3 K1 O4 C11 <sup>1</sup>                | 79.5(13)   |
| C13 C12 O3 C18 <sup>1</sup>               | 51.8(18)   | O3 <sup>1</sup> K1 O4 C11 <sup>1</sup>   | -62.3(12)  |
| C13 C12 O3 C19 <sup>1</sup>               | 160.2(11)  | O3 <sup>1</sup> K1 O4 C19                | -9.5(5)    |
| C13 C12 O3 K1                             | -35.4(9)   | O3 K1 O4 C19                             | 132.3(6)   |
| C13 C12 O3 O4 <sup>1</sup>                | 169.7(19)  | O3 <sup>1</sup> K1 O4 C20                | -146.4(8)  |
| C13 <sup>1</sup> C17 O1 C12 <sup>1</sup>  | -14.6(11)  | O3 K1 O4 C20                             | -4.7(7)    |
| C13 <sup>1</sup> C17 O1 C18               | 10.7(10)   | O3 K1 O4 O3 <sup>1</sup>                 | 141.8(5)   |
| C13 <sup>1</sup> C17 O1 K1                | 133.5(8)   | O3 K1 O5 C10                             | -31.1(5)   |
| C13 <sup>1</sup> C17 O1 O2 <sup>1</sup>   | 179.3(11)  | O3 <sup>1</sup> K1 O5 C10                | 168.7(5)   |
| C13 <sup>1</sup> C18 C19 C11 <sup>1</sup> | -68(4)     | O3 K1 O5 C20 <sup>1</sup>                | -9.3(6)    |
| C13 <sup>1</sup> C18 C19 C12 <sup>1</sup> | 52(2)      | O3 <sup>1</sup> K1 O5 C20 <sup>1</sup>   | -169.6(7)  |
| C13 <sup>1</sup> C18 C19 O3 <sup>1</sup>  | -51(2)     | O3 <sup>1</sup> K1 O5 C21 <sup>1</sup>   | 97.9(7)    |
| C13 <sup>1</sup> C18 C19 O4               | -69(2)     | O3 <sup>1</sup> K1 O5 C21                | 48.5(4)    |
| C13 <sup>1</sup> C18 O1 C12 <sup>1</sup>  | 122(3)     | O3 K1 O5 C21                             | -151.3(5)  |
| C13 <sup>1</sup> C18 O1 C17               | -8.5(8)    | O3 K1 O5 C21 <sup>1</sup>                | -101.9(7)  |
| C13 <sup>1</sup> C18 O1 K1                | -128.3(7)  | O3 <sup>1</sup> K1 O5 O5 <sup>1</sup>    | 9.19(12)   |
| C13 <sup>1</sup> C18 O1 O2 <sup>1</sup>   | -26.1(17)  | O3 K1 O5 O5 <sup>1</sup>                 | 169.43(14) |
| C14 C15 O6 C14 <sup>1</sup>               | 148.0(12)  | O3 <sup>1</sup> K1 O6 C14 <sup>1</sup>   | 5.5(6)     |
| C14 C15 O6 C15 <sup>1</sup>               | 162.8(7)   | O3 K1 O6 C14 <sup>1</sup>                | -134.3(6)  |
| C14 C15 O6 C16                            | 177.4(10)  | O3 K1 O6 C15                             | 7.8(5)     |
| C14 C15 O6 K1                             | 3.1(11)    | O3 <sup>1</sup> K1 O6 C15 <sup>1</sup>   | 106.8(16)  |
| C14 C15 O6 O6 <sup>1</sup>                | -17.2(7)   | O3 K1 O6 C15 <sup>1</sup>                | -33.0(17)  |
| C14 <sup>1</sup> C16 C17 C13 <sup>1</sup> | -101(3)    | O3 <sup>1</sup> K1 O6 C15                | 147.6(5)   |
| C14 <sup>1</sup> C16 C17 O1               | -75.3(17)  | O3 K1 O6 C16                             | -167.4(6)  |
| C14 <sup>1</sup> C16 C17 O2 <sup>1</sup>  | -65.4(16)  | O3 <sup>1</sup> K1 O6 C16                | -27.6(6)   |
| C14 <sup>1</sup> C16 O6 C15               | -65.1(19)  | O3 K1 O6 O6 <sup>1</sup>                 | 21.26(11)  |
| C14 <sup>1</sup> C16 O6 C15 <sup>1</sup>  | -54.4(18)  | O3 <sup>1</sup> K1 O6 O6 <sup>1</sup>    | 161.07(10) |
| C14 <sup>1</sup> C16 O6 K1                | 109.5(17)  | O3 K1 S1 P1                              | 161.00(13) |
| C14 <sup>1</sup> C16 O6 O6 <sup>1</sup>   | -106(2)    | O3 <sup>1</sup> K1 S1 P1                 | 25.05(17)  |
| C14 <sup>1</sup> C17 O1 C12 <sup>1</sup>  | 149.5(9)   | O4 <sup>1</sup> C10 C11 C19 <sup>1</sup> | -27.8(14)  |
| C14 <sup>1</sup> C17 O1 C13 <sup>1</sup>  | 164.1(12)  | O4 <sup>1</sup> C10 C11 C20 <sup>1</sup> | 104(3)     |

|                                           |             |                                         |            |
|-------------------------------------------|-------------|-----------------------------------------|------------|
| C14 <sup>1</sup> C17 O1 C18               | 174.8(8)    | O4 <sup>1</sup> C10 C11 O3              | -1.2(5)    |
| C14 <sup>1</sup> C17 O1 K1                | -62.4(7)    | O4 <sup>1</sup> C10 O5 C20 <sup>1</sup> | -69(2)     |
| C14 <sup>1</sup> C17 O1 O2 <sup>1</sup>   | -16.6(6)    | O4 <sup>1</sup> C10 O5 C21 <sup>1</sup> | 137.1(7)   |
| C15 C14 O2 C13                            | 158.9(9)    | O4 <sup>1</sup> C10 O5 C21              | 139.4(5)   |
| C15 C14 O2 C16 <sup>1</sup>               | 80.7(18)    | O4 <sup>1</sup> C10 O5 K1               | 22.9(5)    |
| C15 C14 O2 C17 <sup>1</sup>               | 144.5(11)   | O4 <sup>1</sup> C10 O5 O5 <sup>1</sup>  | 144.3(9)   |
| C15 C14 O2 K1                             | 11.2(12)    | O4 <sup>1</sup> C11 O3 C12              | -177.4(8)  |
| C15 C14 O2 O1 <sup>1</sup>                | -165.6(14)  | O4 <sup>1</sup> C11 O3 C18 <sup>1</sup> | -150.7(9)  |
| C15 <sup>1</sup> C15 O6 C14 <sup>1</sup>  | -14.7(6)    | O4 <sup>1</sup> C11 O3 C19 <sup>1</sup> | -157.2(12) |
| C15 <sup>1</sup> C15 O6 C16               | 14.6(7)     | O4 <sup>1</sup> C11 O3 K1               | 34.8(6)    |
| C15 <sup>1</sup> C15 O6 K1                | -159.7(7)   | O4 C20 C21 C10 <sup>1</sup>             | -81(3)     |
| C15 <sup>1</sup> C15 O6 O6 <sup>1</sup>   | -179.992(2) | O4 C20 C21 C21 <sup>1</sup>             | 90.4(10)   |
| C15 <sup>1</sup> C16 C17 C13 <sup>1</sup> | -69(4)      | O4 C20 C21 O5                           | 78.5(8)    |
| C15 <sup>1</sup> C16 C17 C14 <sup>1</sup> | 32.0(13)    | O4 C20 C21 O5 <sup>1</sup>              | 70.8(8)    |
| C15 <sup>1</sup> C16 C17 O1               | -43(2)      | O4 K1 O1 C12 <sup>1</sup>               | 2.7(5)     |
| C15 <sup>1</sup> C16 C17 O2 <sup>1</sup>  | -33.4(16)   | O4 <sup>1</sup> K1 O1 C12 <sup>1</sup>  | -50.5(6)   |
| C15 <sup>1</sup> C16 O6 C14 <sup>1</sup>  | 54.4(18)    | O4 K1 O1 C13 <sup>1</sup>               | -102.8(10) |
| C15 <sup>1</sup> C16 O6 C15               | -10.6(5)    | O4 <sup>1</sup> K1 O1 C13 <sup>1</sup>  | -156.0(10) |
| C15 <sup>1</sup> C16 O6 K1                | 163.9(7)    | O4 <sup>1</sup> K1 O1 C17               | 158.5(5)   |
| C15 <sup>1</sup> C16 O6 O6 <sup>1</sup>   | -52(2)      | O4 K1 O1 C17                            | -148.3(6)  |
| C16 <sup>1</sup> C14 C15 C15 <sup>1</sup> | 102(2)      | O4 K1 O1 C18                            | -26.6(6)   |
| C16 <sup>1</sup> C14 C15 O6               | 66.9(18)    | O4 <sup>1</sup> K1 O1 C18               | -79.8(7)   |
| C16 <sup>1</sup> C14 C15 O6 <sup>1</sup>  | 53.0(15)    | O4 <sup>1</sup> K1 O1 O2 <sup>1</sup>   | 127.5(4)   |
| C16 <sup>1</sup> C14 O2 C13               | 78.1(19)    | O4 K1 O1 O2 <sup>1</sup>                | -179.3(4)  |
| C16 <sup>1</sup> C14 O2 C17 <sup>1</sup>  | 63.8(18)    | O4 <sup>1</sup> K1 O2 C13               | 30.7(5)    |
| C16 <sup>1</sup> C14 O2 K1                | -69.5(19)   | O4 K1 O2 C13                            | 111.8(5)   |
| C16 <sup>1</sup> C14 O2 O1 <sup>1</sup>   | 114(2)      | O4 <sup>1</sup> K1 O2 C14               | -179.4(6)  |
| C16 <sup>1</sup> C15 O6 C14 <sup>1</sup>  | 175.7(7)    | O4 K1 O2 C14                            | -98.2(6)   |
| C16 <sup>1</sup> C15 O6 C15 <sup>1</sup>  | -169.6(5)   | O4 <sup>1</sup> K1 O2 C16 <sup>1</sup>  | 151.9(6)   |
| C16 <sup>1</sup> C15 O6 C16               | -154.9(11)  | O4 K1 O2 C16 <sup>1</sup>               | -127.0(6)  |
| C16 <sup>1</sup> C15 O6 K1                | 30.7(8)     | O4 <sup>1</sup> K1 O2 C17 <sup>1</sup>  | 81.7(10)   |
| C16 <sup>1</sup> C15 O6 O6 <sup>1</sup>   | 10.4(5)     | O4 K1 O2 C17 <sup>1</sup>               | 162.9(9)   |
| C16 C17 O1 C12 <sup>1</sup>               | 179.1(9)    | O4 <sup>1</sup> K1 O2 O1 <sup>1</sup>   | -0.6(4)    |
| C16 C17 O1 C13 <sup>1</sup>               | -166.2(14)  | O4 K1 O2 O1 <sup>1</sup>                | 80.5(5)    |
| C16 C17 O1 C18                            | -155.5(10)  | O4 K1 O3 C11                            | 3.7(6)     |
| C16 C17 O1 K1                             | -32.8(10)   | O4 <sup>1</sup> K1 O3 C11               | -26.7(5)   |
| C16 C17 O1 O2 <sup>1</sup>                | 13.1(8)     | O4 <sup>1</sup> K1 O3 C12               | -172.3(7)  |
| C17 <sup>1</sup> C13 O2 C14               | -19.2(10)   | O4 K1 O3 C12                            | -141.9(5)  |
| C17 <sup>1</sup> C13 O2 C16 <sup>1</sup>  | 11.9(10)    | O4 K1 O3 C18 <sup>1</sup>               | -171.3(6)  |
| C17 <sup>1</sup> C13 O2 K1                | 130.5(8)    | O4 <sup>1</sup> K1 O3 C18 <sup>1</sup>  | 158.3(8)   |

|                                           |            |                                          |            |
|-------------------------------------------|------------|------------------------------------------|------------|
| C17 <sup>1</sup> C13 O2 O1 <sup>1</sup>   | -179.3(11) | O4 <sup>1</sup> K1 O3 C19 <sup>1</sup>   | -62(3)     |
| C17 <sup>1</sup> C14 C15 C15 <sup>1</sup> | 68(3)      | O4 K1 O3 C19 <sup>1</sup>                | -32(4)     |
| C17 <sup>1</sup> C14 C15 C16 <sup>1</sup> | -33.9(12)  | O4 K1 O3 O4 <sup>1</sup>                 | 30.4(4)    |
| C17 <sup>1</sup> C14 C15 O6               | 33(2)      | O4 <sup>1</sup> K1 O4 C10 <sup>1</sup>   | -16.6(5)   |
| C17 <sup>1</sup> C14 C15 O6 <sup>1</sup>  | 19.1(19)   | O4 <sup>1</sup> K1 O4 C11 <sup>1</sup>   | 89.9(12)   |
| C17 <sup>1</sup> C14 O2 C13               | 14.3(8)    | O4 <sup>1</sup> K1 O4 C19                | 142.7(5)   |
| C17 <sup>1</sup> C14 O2 C16 <sup>1</sup>  | -63.8(18)  | O4 <sup>1</sup> K1 O4 C20                | 5.8(7)     |
| C17 <sup>1</sup> C14 O2 K1                | -133.3(7)  | O4 <sup>1</sup> K1 O4 O3 <sup>1</sup>    | 152.2(3)   |
| C17 <sup>1</sup> C14 O2 O1 <sup>1</sup>   | 49.8(17)   | O4 <sup>1</sup> K1 O5 C10                | -18.7(4)   |
| C17 C16 O6 C14 <sup>1</sup>               | -80.9(18)  | O4 K1 O5 C10                             | 158.2(5)   |
| C17 C16 O6 C15                            | -145.9(10) | O4 <sup>1</sup> K1 O5 C20 <sup>1</sup>   | 3.0(6)     |
| C17 C16 O6 C15 <sup>1</sup>               | -135.3(13) | O4 K1 O5 C20 <sup>1</sup>                | 179.9(7)   |
| C17 C16 O6 K1                             | 28.6(13)   | O4 <sup>1</sup> K1 O5 C21 <sup>1</sup>   | -89.5(7)   |
| C17 C16 O6 O6 <sup>1</sup>                | 173.2(13)  | O4 K1 O5 C21 <sup>1</sup>                | 87.3(7)    |
| C18 <sup>1</sup> C12 C13 C17 <sup>1</sup> | 142(3)     | O4 K1 O5 C21                             | 38.0(4)    |
| C18 <sup>1</sup> C12 C13 O1 <sup>1</sup>  | 117(3)     | O4 <sup>1</sup> K1 O5 C21                | -138.9(5)  |
| C18 <sup>1</sup> C12 C13 O2               | 126(2)     | O4 <sup>1</sup> K1 O5 O5 <sup>1</sup>    | -178.2(2)  |
| C18 <sup>1</sup> C12 O3 C11               | 124(2)     | O4 K1 O5 O5 <sup>1</sup>                 | -1.35(15)  |
| C18 <sup>1</sup> C12 O3 C19 <sup>1</sup>  | 108(2)     | O4 K1 O6 C14 <sup>1</sup>                | 5.3(6)     |
| C18 <sup>1</sup> C12 O3 K1                | -87(2)     | O4 <sup>1</sup> K1 O6 C14 <sup>1</sup>   | -129.7(6)  |
| C18 <sup>1</sup> C12 O3 O4 <sup>1</sup>   | 118(2)     | O4 <sup>1</sup> K1 O6 C15 <sup>1</sup>   | -28.4(17)  |
| C18 <sup>1</sup> C13 O2 C14               | 173.1(9)   | O4 <sup>1</sup> K1 O6 C15                | 12.4(6)    |
| C18 <sup>1</sup> C13 O2 C16 <sup>1</sup>  | -155.9(10) | O4 K1 O6 C15 <sup>1</sup>                | 106.5(16)  |
| C18 <sup>1</sup> C13 O2 C17 <sup>1</sup>  | -167.7(14) | O4 K1 O6 C15                             | 147.3(5)   |
| C18 <sup>1</sup> C13 O2 K1                | -37.3(10)  | O4 <sup>1</sup> K1 O6 C16                | -162.8(6)  |
| C18 <sup>1</sup> C13 O2 O1 <sup>1</sup>   | 13.0(8)    | O4 K1 O6 C16                             | -27.9(6)   |
| C18 C19 O4 C10 <sup>1</sup>               | -163.0(7)  | O4 K1 O6 O6 <sup>1</sup>                 | 160.79(12) |
| C18 C19 O4 C11 <sup>1</sup>               | 179.5(12)  | O4 <sup>1</sup> K1 O6 O6 <sup>1</sup>    | 25.87(16)  |
| C18 C19 O4 C20                            | 178.0(9)   | O4 K1 S1 P1                              | 50.10(15)  |
| C18 C19 O4 K1                             | 37.9(9)    | O4 <sup>1</sup> K1 S1 P1                 | 139.95(13) |
| C18 C19 O4 O3 <sup>1</sup>                | 22.6(8)    | O5 C10 C11 C19 <sup>1</sup>              | -89.4(16)  |
| C19 <sup>1</sup> C11 O3 C12               | -20.2(11)  | O5 C10 C11 C20 <sup>1</sup>              | 42(3)      |
| C19 <sup>1</sup> C11 O3 C18 <sup>1</sup>  | 6.5(12)    | O5 C10 C11 O3                            | -62.8(8)   |
| C19 <sup>1</sup> C11 O3 K1                | -167.9(10) | O5 C10 C11 O4 <sup>1</sup>               | -61.6(7)   |
| C19 <sup>1</sup> C11 O3 O4 <sup>1</sup>   | 157.2(12)  | O5 <sup>1</sup> C20 C21 C10 <sup>1</sup> | -152(3)    |
| C19 <sup>1</sup> C12 C13 C17 <sup>1</sup> | 99(2)      | O5 <sup>1</sup> C20 C21 C21 <sup>1</sup> | 19.6(9)    |
| C19 <sup>1</sup> C12 C13 C18 <sup>1</sup> | -43.1(19)  | O5 <sup>1</sup> C20 C21 O5               | 7.7(4)     |
| C19 <sup>1</sup> C12 C13 O1 <sup>1</sup>  | 74.3(17)   | O5 <sup>1</sup> C20 O4 C10 <sup>1</sup>  | 92(3)      |
| C19 <sup>1</sup> C12 C13 O2               | 83.1(17)   | O5 <sup>1</sup> C20 O4 C11 <sup>1</sup>  | -145.9(9)  |
| C19 <sup>1</sup> C12 O3 C11               | 15.9(8)    | O5 <sup>1</sup> C20 O4 C19               | -144.7(7)  |

|                                           |            |                                         |            |
|-------------------------------------------|------------|-----------------------------------------|------------|
| C19 <sup>1</sup> C12 O3 C18 <sup>1</sup>  | -108(2)    | O5 <sup>1</sup> C20 O4 K1               | -4.4(9)    |
| C19 <sup>1</sup> C12 O3 K1                | 164.4(8)   | O5 <sup>1</sup> C20 O4 O3 <sup>1</sup>  | -119.5(12) |
| C19 <sup>1</sup> C12 O3 O4 <sup>1</sup>   | 10(2)      | O5 <sup>1</sup> C21 O5 C10              | 177.3(5)   |
| C19 C18 O1 C12 <sup>1</sup>               | -53.1(19)  | O5 <sup>1</sup> C21 O5 C20 <sup>1</sup> | 165.4(7)   |
| C19 C18 O1 C13 <sup>1</sup>               | -175.4(12) | O5 <sup>1</sup> C21 O5 C21 <sup>1</sup> | 179.999(4) |
| C19 C18 O1 C17                            | 176.1(8)   | O5 <sup>1</sup> C21 O5 K1               | -61.3(5)   |
| C19 C18 O1 K1                             | 56.3(10)   | O5 <sup>1</sup> K1 O1 C12 <sup>1</sup>  | -17.2(6)   |
| C19 C18 O1 O2 <sup>1</sup>                | 158.5(13)  | O5 K1 O1 C12 <sup>1</sup>               | -25.4(6)   |
| C20 <sup>1</sup> C10 C11 C19 <sup>1</sup> | -131(3)    | O5 K1 O1 C13 <sup>1</sup>               | -130.9(10) |
| C20 <sup>1</sup> C10 C11 O3               | -105(3)    | O5 <sup>1</sup> K1 O1 C13 <sup>1</sup>  | -122.7(10) |
| C20 <sup>1</sup> C10 C11 O4 <sup>1</sup>  | -104(3)    | O5 K1 O1 C17                            | -176.3(5)  |
| C20 <sup>1</sup> C10 O5 C21               | -152(2)    | O5 <sup>1</sup> K1 O1 C17               | -168.2(5)  |
| C20 <sup>1</sup> C10 O5 C21 <sup>1</sup>  | -154(3)    | O5 <sup>1</sup> K1 O1 C18               | -46.5(6)   |
| C20 <sup>1</sup> C10 O5 K1                | 92(3)      | O5 K1 O1 C18                            | -54.6(6)   |
| C20 <sup>1</sup> C10 O5 O5 <sup>1</sup>   | -147(2)    | O5 <sup>1</sup> K1 O1 O2 <sup>1</sup>   | 160.9(4)   |
| C20 <sup>1</sup> C11 O3 C12               | 166.5(9)   | O5 K1 O1 O2 <sup>1</sup>                | 152.7(4)   |
| C20 <sup>1</sup> C11 O3 C18 <sup>1</sup>  | -166.8(9)  | O5 K1 O2 C13                            | 51.9(5)    |
| C20 <sup>1</sup> C11 O3 C19 <sup>1</sup>  | -173.3(14) | O5 <sup>1</sup> K1 O2 C13               | 64.0(5)    |
| C20 <sup>1</sup> C11 O3 K1                | 18.7(10)   | O5 K1 O2 C14                            | -158.2(6)  |
| C20 <sup>1</sup> C11 O3 O4 <sup>1</sup>   | -16.1(8)   | O5 <sup>1</sup> K1 O2 C14               | -146.1(6)  |
| C20 C21 O5 C10                            | 167.3(5)   | O5 <sup>1</sup> K1 O2 C16 <sup>1</sup>  | -174.9(6)  |
| C20 C21 O5 C20 <sup>1</sup>               | 155.4(12)  | O5 K1 O2 C16 <sup>1</sup>               | 173.1(6)   |
| C20 C21 O5 C21 <sup>1</sup>               | 170.0(5)   | O5 <sup>1</sup> K1 O2 C17 <sup>1</sup>  | 115.0(10)  |
| C20 C21 O5 K1                             | -71.3(6)   | O5 K1 O2 C17 <sup>1</sup>               | 102.9(10)  |
| C20 C21 O5 O5 <sup>1</sup>                | -10.0(5)   | O5 K1 O2 O1 <sup>1</sup>                | 20.6(4)    |
| C21 <sup>1</sup> C10 C11 C19 <sup>1</sup> | -80(2)     | O5 <sup>1</sup> K1 O2 O1 <sup>1</sup>   | 32.7(4)    |
| C21 <sup>1</sup> C10 C11 C20 <sup>1</sup> | 51(3)      | O5 <sup>1</sup> K1 O3 C11               | -1.3(5)    |
| C21 <sup>1</sup> C10 C11 O3               | -53.9(17)  | O5 K1 O3 C11                            | -4.6(5)    |
| C21 <sup>1</sup> C10 C11 O4 <sup>1</sup>  | -52.7(16)  | O5 <sup>1</sup> K1 O3 C12               | -146.9(5)  |
| C21 <sup>1</sup> C10 O5 C20 <sup>1</sup>  | 154(3)     | O5 K1 O3 C12                            | -150.3(6)  |
| C21 <sup>1</sup> C10 O5 C21               | 2.3(4)     | O5 <sup>1</sup> K1 O3 C18 <sup>1</sup>  | -176.3(6)  |
| C21 <sup>1</sup> C10 O5 K1                | -114.2(6)  | O5 K1 O3 C18 <sup>1</sup>               | -179.7(7)  |
| C21 <sup>1</sup> C10 O5 O5 <sup>1</sup>   | 7.1(12)    | O5 <sup>1</sup> K1 O3 C19 <sup>1</sup>  | -37(3)     |
| C21 C20 O4 C10 <sup>1</sup>               | 54(3)      | O5 K1 O3 C19 <sup>1</sup>               | -40(3)     |
| C21 C20 O4 C11 <sup>1</sup>               | 176.1(10)  | O5 K1 O3 O4 <sup>1</sup>                | 22.0(4)    |
| C21 C20 O4 C19                            | 177.3(7)   | O5 <sup>1</sup> K1 O3 O4 <sup>1</sup>   | 25.4(4)    |
| C21 C20 O4 K1                             | -42.3(9)   | O5 K1 O4 C10 <sup>1</sup>               | -18.6(4)   |
| C21 C20 O4 O3 <sup>1</sup>                | -157.5(9)  | O5 <sup>1</sup> K1 O4 C10 <sup>1</sup>  | -19.3(4)   |
| C21 <sup>1</sup> C21 O5 C10               | -2.7(5)    | O5 <sup>1</sup> K1 O4 C11 <sup>1</sup>  | 87.3(12)   |
| C21 <sup>1</sup> C21 O5 C20 <sup>1</sup>  | -14.6(7)   | O5 K1 O4 C11 <sup>1</sup>               | 87.9(12)   |

|                  |     |     |                  |            |                 |     |     |                  |            |
|------------------|-----|-----|------------------|------------|-----------------|-----|-----|------------------|------------|
| C21 <sup>1</sup> | C21 | O5  | K1               | 118.7(5)   | O5 <sup>1</sup> | K1  | O4  | C19              | 140.1(6)   |
| C21 <sup>1</sup> | C21 | O5  | O5 <sup>1</sup>  | 180.001(3) | O5              | K1  | O4  | C19              | 140.7(6)   |
| N1               | C5  | C6  | C7 <sup>1</sup>  | 80.8(3)    | O5 <sup>1</sup> | K1  | O4  | C20              | 3.1(7)     |
| N1               | C5  | C6  | C7               | -80.8(3)   | O5              | K1  | O4  | C20              | 3.8(7)     |
| N1               | C5  | C6  | C8 <sup>1</sup>  | -164.8(3)  | O5              | K1  | O4  | O3 <sup>1</sup>  | 150.2(4)   |
| N1               | C5  | C6  | C8               | 164.8(3)   | O5 <sup>1</sup> | K1  | O4  | O3 <sup>1</sup>  | 149.6(5)   |
| N1               | C5  | C6  | C9               | 35.0(3)    | O5 <sup>1</sup> | K1  | O5  | C10              | 159.5(5)   |
| N1               | C5  | C6  | C9 <sup>1</sup>  | -35.0(3)   | O5 <sup>1</sup> | K1  | O5  | C20 <sup>1</sup> | -178.8(6)  |
| N1               | C5  | P1  | C4               | 0.0        | O5 <sup>1</sup> | K1  | O5  | C21              | 39.3(4)    |
| N1               | C5  | P1  | S1               | 110.89(6)  | O5 <sup>1</sup> | K1  | O5  | C21 <sup>1</sup> | 88.7(7)    |
| N1               | C5  | P1  | S1 <sup>1</sup>  | -110.89(6) | O5              | K1  | O6  | C14 <sup>1</sup> | -63.4(7)   |
| N2               | C4  | P1  | C5               | 0.0        | O5 <sup>1</sup> | K1  | O6  | C14 <sup>1</sup> | -30.0(7)   |
| N2               | C4  | P1  | S1               | -111.55(6) | O5              | K1  | O6  | C15 <sup>1</sup> | 37.9(18)   |
| N2               | C4  | P1  | S1 <sup>1</sup>  | 111.54(6)  | O5              | K1  | O6  | C15              | 78.6(6)    |
| O1 <sup>1</sup>  | C12 | C13 | C17 <sup>1</sup> | 25.1(19)   | O5 <sup>1</sup> | K1  | O6  | C15 <sup>1</sup> | 71.3(17)   |
| O1 <sup>1</sup>  | C12 | C13 | C18 <sup>1</sup> | -117(3)    | O5 <sup>1</sup> | K1  | O6  | C15              | 112.0(5)   |
| O1 <sup>1</sup>  | C12 | C13 | O2               | 8.8(5)     | O5 <sup>1</sup> | K1  | O6  | C16              | -63.1(7)   |
| O1 <sup>1</sup>  | C12 | O3  | C11              | -153.8(6)  | O5              | K1  | O6  | C16              | -96.6(6)   |
| O1 <sup>1</sup>  | C12 | O3  | C18 <sup>1</sup> | 82(2)      | O5 <sup>1</sup> | K1  | O6  | O6 <sup>1</sup>  | 125.5(2)   |
| O1 <sup>1</sup>  | C12 | O3  | C19 <sup>1</sup> | -169.7(9)  | O5              | K1  | O6  | O6 <sup>1</sup>  | 92.1(3)    |
| O1 <sup>1</sup>  | C12 | O3  | K1               | -5.3(7)    | O5              | K1  | S1  | P1               | 109.84(10) |
| O1 <sup>1</sup>  | C12 | O3  | O4 <sup>1</sup>  | -160(2)    | O5 <sup>1</sup> | K1  | S1  | P1               | 93.57(11)  |
| O1 <sup>1</sup>  | C13 | O2  | C14              | 160.1(8)   | O6 <sup>1</sup> | C14 | C15 | C15 <sup>1</sup> | 48.8(15)   |
| O1 <sup>1</sup>  | C13 | O2  | C16 <sup>1</sup> | -168.8(8)  | O6 <sup>1</sup> | C14 | C15 | C16 <sup>1</sup> | -53.0(15)  |
| O1 <sup>1</sup>  | C13 | O2  | C17 <sup>1</sup> | 179.3(11)  | O6 <sup>1</sup> | C14 | C15 | O6               | 13.8(5)    |
| O1 <sup>1</sup>  | C13 | O2  | K1               | -50.2(6)   | O6 <sup>1</sup> | C14 | O2  | C13              | 144.1(6)   |
| O1               | C18 | C19 | C11 <sup>1</sup> | -62(4)     | O6 <sup>1</sup> | C14 | O2  | C16 <sup>1</sup> | 66.0(16)   |
| O1               | C18 | C19 | C12 <sup>1</sup> | 58.1(18)   | O6 <sup>1</sup> | C14 | O2  | C17 <sup>1</sup> | 129.8(8)   |
| O1               | C18 | C19 | O3 <sup>1</sup>  | -45.5(10)  | O6 <sup>1</sup> | C14 | O2  | K1               | -3.5(7)    |
| O1               | C18 | C19 | O4               | -63.2(11)  | O6 <sup>1</sup> | C14 | O2  | O1 <sup>1</sup>  | 179.6(15)  |
| O1 <sup>1</sup>  | K1  | O1  | C12 <sup>1</sup> | -130.5(5)  | O6 <sup>1</sup> | C15 | O6  | C14 <sup>1</sup> | 165.3(6)   |
| O1 <sup>1</sup>  | K1  | O1  | C13 <sup>1</sup> | 123.9(10)  | O6 <sup>1</sup> | C15 | O6  | C15 <sup>1</sup> | 179.992(2) |
| O1 <sup>1</sup>  | K1  | O1  | C17              | 78.5(6)    | O6 <sup>1</sup> | C15 | O6  | C16              | -165.4(7)  |
| O1 <sup>1</sup>  | K1  | O1  | C18              | -159.8(5)  | O6 <sup>1</sup> | C15 | O6  | K1               | 20.3(7)    |
| O1 <sup>1</sup>  | K1  | O1  | O2 <sup>1</sup>  | 47.5(5)    | O6              | C16 | C17 | C13 <sup>1</sup> | -20(4)     |
| O1 <sup>1</sup>  | K1  | O2  | C13              | 31.3(5)    | O6              | C16 | C17 | C14 <sup>1</sup> | 80.3(18)   |
| O1               | K1  | O2  | C13              | 171.1(5)   | O6              | C16 | C17 | O1               | 5.0(16)    |
| O1               | K1  | O2  | C14              | -39.0(6)   | O6              | C16 | C17 | O2 <sup>1</sup>  | 14.9(12)   |
| O1 <sup>1</sup>  | K1  | O2  | C14              | -178.8(8)  | O6 <sup>1</sup> | K1  | O1  | C12 <sup>1</sup> | -171.2(6)  |
| O1 <sup>1</sup>  | K1  | O2  | C16 <sup>1</sup> | 152.5(8)   | O6              | K1  | O1  | C12 <sup>1</sup> | -179.2(6)  |



|                 |    |    |                  |            |                 |    |    |                  |            |
|-----------------|----|----|------------------|------------|-----------------|----|----|------------------|------------|
| O1              | K1 | O2 | C16 <sup>1</sup> | -67.7(6)   | O6              | K1 | O1 | C13 <sup>1</sup> | 75.3(10)   |
| O1 <sup>1</sup> | K1 | O2 | C17 <sup>1</sup> | 82.4(9)    | O6 <sup>1</sup> | K1 | O1 | C13 <sup>1</sup> | 83.3(10)   |
| O1              | K1 | O2 | C17 <sup>1</sup> | -137.9(10) | O6              | K1 | O1 | C17              | 29.8(5)    |
| O1              | K1 | O2 | O1 <sup>1</sup>  | 139.8(4)   | O6 <sup>1</sup> | K1 | O1 | C17              | 37.8(5)    |
| O1              | K1 | O3 | C11              | 71.4(6)    | O6 <sup>1</sup> | K1 | O1 | C18              | 159.5(6)   |
| O1 <sup>1</sup> | K1 | O3 | C11              | 149.7(6)   | O6              | K1 | O1 | C18              | 151.5(6)   |
| O1              | K1 | O3 | C12              | -74.2(6)   | O6 <sup>1</sup> | K1 | O1 | O2 <sup>1</sup>  | 6.8(4)     |
| O1 <sup>1</sup> | K1 | O3 | C12              | 4.0(5)     | O6              | K1 | O1 | O2 <sup>1</sup>  | -1.2(4)    |
| O1              | K1 | O3 | C18 <sup>1</sup> | -103.6(6)  | O6              | K1 | O2 | C13              | -156.5(6)  |
| O1 <sup>1</sup> | K1 | O3 | C18 <sup>1</sup> | -25.3(6)   | O6 <sup>1</sup> | K1 | O2 | C13              | -147.1(6)  |
| O1 <sup>1</sup> | K1 | O3 | C19 <sup>1</sup> | 114(4)     | O6              | K1 | O2 | C14              | -6.6(6)    |
| O1              | K1 | O3 | C19 <sup>1</sup> | 36(4)      | O6 <sup>1</sup> | K1 | O2 | C14              | 2.9(6)     |
| O1 <sup>1</sup> | K1 | O3 | O4 <sup>1</sup>  | 176.4(5)   | O6              | K1 | O2 | C16 <sup>1</sup> | -35.4(6)   |
| O1              | K1 | O3 | O4 <sup>1</sup>  | 98.1(5)    | O6 <sup>1</sup> | K1 | O2 | C16 <sup>1</sup> | -25.9(6)   |
| O1 <sup>1</sup> | K1 | O4 | C10 <sup>1</sup> | -59.7(5)   | O6              | K1 | O2 | C17 <sup>1</sup> | -105.5(10) |
| O1              | K1 | O4 | C10 <sup>1</sup> | -166.2(5)  | O6 <sup>1</sup> | K1 | O2 | C17 <sup>1</sup> | -96.0(10)  |
| O1 <sup>1</sup> | K1 | O4 | C11 <sup>1</sup> | 46.8(13)   | O6              | K1 | O2 | O1 <sup>1</sup>  | 172.2(4)   |
| O1              | K1 | O4 | C11 <sup>1</sup> | -59.7(12)  | O6 <sup>1</sup> | K1 | O2 | O1 <sup>1</sup>  | -178.4(5)  |
| O1 <sup>1</sup> | K1 | O4 | C19              | 99.6(6)    | O6              | K1 | O3 | C11              | 144.6(5)   |
| O1              | K1 | O4 | C19              | -6.9(5)    | O6 <sup>1</sup> | K1 | O3 | C11              | 152.7(5)   |
| O1              | K1 | O4 | C20              | -143.9(7)  | O6              | K1 | O3 | C12              | -1.1(5)    |
| O1 <sup>1</sup> | K1 | O4 | C20              | -37.3(8)   | O6 <sup>1</sup> | K1 | O3 | C12              | 7.0(5)     |
| O1 <sup>1</sup> | K1 | O4 | O3 <sup>1</sup>  | 109.1(4)   | O6              | K1 | O3 | C18 <sup>1</sup> | -30.4(6)   |
| O1              | K1 | O4 | O3 <sup>1</sup>  | 2.6(4)     | O6 <sup>1</sup> | K1 | O3 | C18 <sup>1</sup> | -22.4(6)   |
| O1 <sup>1</sup> | K1 | O5 | C10              | -46.3(5)   | O6              | K1 | O3 | C19 <sup>1</sup> | 109(3)     |
| O1              | K1 | O5 | C10              | -173.3(5)  | O6 <sup>1</sup> | K1 | O3 | C19 <sup>1</sup> | 117(3)     |
| O1 <sup>1</sup> | K1 | O5 | C20 <sup>1</sup> | -24.6(7)   | O6              | K1 | O3 | O4 <sup>1</sup>  | 171.3(4)   |
| O1              | K1 | O5 | C20 <sup>1</sup> | -151.5(6)  | O6 <sup>1</sup> | K1 | O3 | O4 <sup>1</sup>  | 179.3(4)   |
| O1              | K1 | O5 | C21              | 66.5(4)    | O6 <sup>1</sup> | K1 | O4 | C10 <sup>1</sup> | -157.2(4)  |
| O1 <sup>1</sup> | K1 | O5 | C21 <sup>1</sup> | -117.1(7)  | O6              | K1 | O4 | C10 <sup>1</sup> | -168.0(4)  |
| O1              | K1 | O5 | C21 <sup>1</sup> | 115.9(7)   | O6 <sup>1</sup> | K1 | O4 | C11 <sup>1</sup> | -50.7(13)  |
| O1 <sup>1</sup> | K1 | O5 | C21              | -166.5(4)  | O6              | K1 | O4 | C11 <sup>1</sup> | -61.5(12)  |
| O1              | K1 | O5 | O5 <sup>1</sup>  | 27.23(11)  | O6              | K1 | O4 | C19              | -8.7(6)    |
| O1 <sup>1</sup> | K1 | O5 | O5 <sup>1</sup>  | 154.20(10) | O6 <sup>1</sup> | K1 | O4 | C19              | 2.1(6)     |
| O1 <sup>1</sup> | K1 | O6 | C14 <sup>1</sup> | -137.4(6)  | O6              | K1 | O4 | C20              | -145.7(6)  |
| O1              | K1 | O6 | C14 <sup>1</sup> | 3.5(6)     | O6 <sup>1</sup> | K1 | O4 | C20              | -134.9(7)  |
| O1 <sup>1</sup> | K1 | O6 | C15 <sup>1</sup> | -36.1(16)  | O6              | K1 | O4 | O3 <sup>1</sup>  | 0.8(4)     |
| O1 <sup>1</sup> | K1 | O6 | C15              | 4.6(5)     | O6 <sup>1</sup> | K1 | O4 | O3 <sup>1</sup>  | 11.6(5)    |
| O1              | K1 | O6 | C15              | 145.5(5)   | O6              | K1 | O5 | C10              | -117.5(5)  |
| O1              | K1 | O6 | C15 <sup>1</sup> | 104.7(17)  | O6 <sup>1</sup> | K1 | O5 | C10              | -74.4(5)   |

|                 |     |     |                  |             |                 |    |    |                  |            |
|-----------------|-----|-----|------------------|-------------|-----------------|----|----|------------------|------------|
| O1              | K1  | O6  | C16              | -29.7(6)    | O6 <sup>1</sup> | K1 | O5 | C20 <sup>1</sup> | -52.7(7)   |
| O1 <sup>1</sup> | K1  | O6  | C16              | -170.6(6)   | O6              | K1 | O5 | C20 <sup>1</sup> | -95.8(7)   |
| O1              | K1  | O6  | O6 <sup>1</sup>  | 158.99(12)  | O6 <sup>1</sup> | K1 | O5 | C21 <sup>1</sup> | -145.2(7)  |
| O1 <sup>1</sup> | K1  | O6  | O6 <sup>1</sup>  | 18.12(10)   | O6              | K1 | O5 | C21 <sup>1</sup> | 171.6(6)   |
| O1 <sup>1</sup> | K1  | S1  | P1               | -161.00(11) | O6              | K1 | O5 | C21              | 122.3(5)   |
| O1              | K1  | S1  | P1               | -30.51(16)  | O6 <sup>1</sup> | K1 | O5 | C21              | 165.4(4)   |
| O2              | C14 | C15 | C15 <sup>1</sup> | 25(2)       | O6 <sup>1</sup> | K1 | O5 | O5 <sup>1</sup>  | 126.1(2)   |
| O2              | C14 | C15 | C16 <sup>1</sup> | -76.6(14)   | O6              | K1 | O5 | O5 <sup>1</sup>  | 82.9(3)    |
| O2              | C14 | C15 | O6 <sup>1</sup>  | -23.6(10)   | O6 <sup>1</sup> | K1 | O6 | C14 <sup>1</sup> | -155.5(6)  |
| O2              | C14 | C15 | O6               | -9.7(15)    | O6 <sup>1</sup> | K1 | O6 | C15              | -13.5(5)   |
| O2 <sup>1</sup> | C16 | C17 | C13 <sup>1</sup> | -35(3)      | O6 <sup>1</sup> | K1 | O6 | C15 <sup>1</sup> | -54.3(17)  |
| O2 <sup>1</sup> | C16 | C17 | C14 <sup>1</sup> | 65.4(16)    | O6 <sup>1</sup> | K1 | O6 | C16              | 171.3(6)   |
| O2 <sup>1</sup> | C16 | C17 | O1               | -9.9(6)     | O6              | K1 | S1 | P1               | -82.81(9)  |
| O2 <sup>1</sup> | C16 | O6  | C14 <sup>1</sup> | -71.0(16)   | O6 <sup>1</sup> | K1 | S1 | P1               | -102.26(9) |
| O2 <sup>1</sup> | C16 | O6  | C15 <sup>1</sup> | -125.4(8)   | P1              | C4 | N2 | N1               | 0.0        |
| O2 <sup>1</sup> | C16 | O6  | C15              | -136.0(7)   | P1              | C5 | C6 | C7 <sup>1</sup>  | -99.2(3)   |
| O2 <sup>1</sup> | C16 | O6  | K1               | 38.5(7)     | P1              | C5 | C6 | C7               | 99.2(3)    |
| O2 <sup>1</sup> | C16 | O6  | O6 <sup>1</sup>  | -176.9(18)  | P1              | C5 | C6 | C8 <sup>1</sup>  | 15.2(3)    |
| O2 <sup>1</sup> | C17 | O1  | C12 <sup>1</sup> | 166.1(9)    | P1              | C5 | C6 | C8               | -15.2(3)   |
| O2 <sup>1</sup> | C17 | O1  | C13 <sup>1</sup> | -179.3(11)  | P1              | C5 | C6 | C9               | -145.0(3)  |
| O2 <sup>1</sup> | C17 | O1  | C18              | -168.6(8)   | P1              | C5 | C6 | C9 <sup>1</sup>  | 145.0(3)   |
| O2 <sup>1</sup> | C17 | O1  | K1               | -45.8(6)    | P1              | C5 | N1 | N2               | 0.0        |
| O2              | K1  | O1  | C12 <sup>1</sup> | -146.6(6)   | S1 <sup>1</sup> | P1 | S1 | K1               | 1.72(7)    |

1+X,1/2-Y,+Z

**Table 7 Hydrogen Atom Coordinates ( $\text{\AA}\times 10^4$ ) and Isotropic Displacement Parameters ( $\text{\AA}^2\times 10^3$ ) for 11.**

| Atom | x    | y    | z    | U(eq) |
|------|------|------|------|-------|
| H1A  | 5639 | 2590 | 7469 | 85    |
| H1B  | 6002 | 1872 | 6646 | 85    |
| H1C  | 6063 | 3038 | 6508 | 85    |
| H2A  | 6849 | 4031 | 7813 | 102   |
| H2B  | 7332 | 3450 | 8641 | 102   |
| H2C  | 6427 | 3467 | 8710 | 102   |
| H7A  | 9629 | 3841 | 5233 | 174   |
| H7B  | 9760 | 3732 | 4046 | 174   |
| H7C  | 8949 | 4059 | 4469 | 174   |
| H8A  | 8637 | 1541 | 3668 | 104   |
| H8B  | 8359 | 2654 | 3540 | 104   |
| H8C  | 9170 | 2327 | 3118 | 104   |
| H9A  | 9716 | 1221 | 4935 | 140   |

|      |       |      |      |     |
|------|-------|------|------|-----|
| H9B  | 10229 | 2008 | 4355 | 140 |
| H9C  | 10079 | 2124 | 5537 | 140 |
| H10A | 3728  | 3934 | 4886 | 71  |
| H10B | 4599  | 3941 | 5211 | 71  |
| H11A | 4351  | 5244 | 3929 | 76  |
| H11B | 4096  | 4412 | 3166 | 76  |
| H12A | 5077  | 5016 | 2025 | 74  |
| H12B | 5293  | 5798 | 2863 | 74  |
| H13A | 6560  | 5075 | 2960 | 78  |
| H13B | 6382  | 5488 | 1863 | 78  |
| H14A | 6717  | 4075 | 604  | 81  |
| H14B | 7340  | 4231 | 1440 | 81  |
| H15A | 7702  | 2901 | 1119 | 89  |
| H15B | 6986  | 2684 | 452  | 89  |
| H16A | 7240  | 1048 | 1002 | 88  |
| H16B | 7605  | 1085 | 2078 | 88  |
| H17A | 6941  | 43   | 2541 | 83  |
| H17B | 6648  | -75  | 1427 | 83  |
| H18A | 5615  | -815 | 2570 | 90  |
| H18B | 5999  | -321 | 3530 | 90  |
| H19A | 4646  | -476 | 3753 | 97  |
| H19B | 4531  | 187  | 2783 | 97  |
| H20A | 3855  | 1334 | 3701 | 93  |
| H20B | 3942  | 631  | 4650 | 93  |
| H21A | 4687  | 2067 | 5437 | 93  |
| H21B | 3785  | 2209 | 5385 | 93  |

Table S8. Crystal structural analysis data for **11**

**Table 1** Crystal data and structure refinement for exp\_26

|                                             |                                                                                 |
|---------------------------------------------|---------------------------------------------------------------------------------|
| Identification code                         | exp_26                                                                          |
| Empirical formula                           | C <sub>22</sub> H <sub>42</sub> N <sub>2</sub> O <sub>6</sub> KPSe <sub>2</sub> |
| Formula weight                              | 658.57                                                                          |
| Temperature/K                               | 150.00(10)                                                                      |
| Crystal system                              | orthorhombic                                                                    |
| Space group                                 | Pnma                                                                            |
| a/Å                                         | 17.1551(9)                                                                      |
| b/Å                                         | 13.4665(7)                                                                      |
| c/Å                                         | 13.0108(6)                                                                      |
| α/°                                         | 90.00                                                                           |
| β/°                                         | 90.00                                                                           |
| γ/°                                         | 90.00                                                                           |
| Volume/Å <sup>3</sup>                       | 3005.7(3)                                                                       |
| Z                                           | 4                                                                               |
| ρ <sub>calc</sub> /mg/mm <sup>3</sup>       | 1.455                                                                           |
| m/mm <sup>-1</sup>                          | 5.118                                                                           |
| F(000)                                      | 1352.0                                                                          |
| Crystal size/mm <sup>3</sup>                | 0.24 × 0.16 × 0.11                                                              |
| 2θ range for data collection                | 8.52 to 134.14°                                                                 |
| Index ranges                                | -18 ≤ h ≤ 20, -12 ≤ k ≤ 16, -14 ≤ l ≤ 15                                        |
| Reflections collected                       | 7954                                                                            |
| Independent reflections                     | 2807[R(int) = 0.0711]                                                           |
| Data/restraints/parameters                  | 2807/122/262                                                                    |
| Goodness-of-fit on F <sup>2</sup>           | 1.118                                                                           |
| Final R indexes [I ≥ 2σ (I)]                | R <sub>1</sub> = 0.1088, wR <sub>2</sub> = 0.2542                               |
| Final R indexes [all data]                  | R <sub>1</sub> = 0.1124, wR <sub>2</sub> = 0.2558                               |
| Largest diff. peak/hole / e Å <sup>-3</sup> | 1.25/-1.87                                                                      |

**Table 2 Fractional Atomic Coordinates (×10<sup>4</sup>) and Equivalent Isotropic Displacement Parameters (Å<sup>2</sup>×10<sup>3</sup>) for exp\_26. U<sub>eq</sub> is defined as 1/3 of the trace of the orthogonalised U<sub>ij</sub> tensor.**

| Atom | x         | y         | z         | U(eq)   |
|------|-----------|-----------|-----------|---------|
| Se1  | 2149.4(7) | 1129.1(8) | 4839.9(8) | 24.8(4) |
| K1   | 881.2(17) | 2500      | 3304(2)   | 17.0(6) |
| P1   | 2569(2)   | 2500      | 5435(2)   | 14.8(7) |
| N1   | 3870(7)   | 2500      | 6489(9)   | 21(3)   |
| N2   | 3239(7)   | 2500      | 7227(9)   | 20(3)   |
| C4   | 2559(8)   | 2500      | 6837(10)  | 16(3)   |
| C5   | 3620(8)   | 2500      | 5546(12)  | 21(3)   |
| C2   | 1824(9)   | 2500      | 7544(11)  | 23(3)   |
| C3   | 1856(8)   | 1557(10)  | 8213(10)  | 43(3)   |

|     |          |          |          |       |
|-----|----------|----------|----------|-------|
| C1  | 1071(8)  | 2500     | 6952(12) | 27(3) |
| C11 | -789(11) | 1117(16) | 4330(20) | 34(7) |
| O1  | 1939(8)  | 2136(9)  | 1739(10) | 23(3) |
| C9  | 376(13)  | -127(16) | 2490(20) | 36(6) |
| C19 | 1923(12) | 1276(10) | 1180(14) | 23(4) |
| C12 | -767(13) | 2115(12) | 4893(14) | 27(5) |
| O3  | -86(8)   | 911(10)  | 3887(11) | 23(3) |
| O2  | 921(8)   | 573(12)  | 2273(11) | 31(4) |
| C10 | -188(15) | 36(15)   | 3376(18) | 48(7) |
| C13 | -756(15) | 3780(11) | 4604(17) | 28(7) |
| O5  | 181(7)   | 4508(11) | 3407(11) | 24(3) |
| O4  | -667(8)  | 2862(10) | 4191(10) | 27(3) |
| C15 | 578(12)  | 5240(13) | 2920(17) | 26(5) |
| C16 | 1290(12) | 5011(12) | 2278(17) | 36(6) |
| C14 | -575(9)  | 4529(17) | 3755(16) | 32(5) |
| C21 | 2167(14) | 2913(12) | 1131(15) | 35(5) |
| O6  | 1327(8)  | 4045(10) | 1958(12) | 27(3) |
| C20 | 1661(10) | 445(16)  | 1900(16) | 30(5) |
| C22 | 2097(10) | 3884(15) | 1731(18) | 31(5) |
| C6  | 4214(9)  | 2271(11) | 4672(14) | 19(5) |
| C7  | 3851(12) | 2500     | 3619(15) | 45(5) |
| C8  | 4510(18) | 1198(15) | 4670(30) | 58(8) |
| C9A | 4903(13) | 2970(20) | 4880(20) | 56(9) |

**Table 3 Anisotropic Displacement Parameters ( $\text{\AA}^2 \times 10^3$ ) for exp\_26. The Anisotropic displacement factor exponent takes the form:  $-2\pi^2[h^2a^*2U_{11} + \dots + 2hka \times b \times U_{12}]$**

| Atom | $U_{11}$ | $U_{22}$ | $U_{33}$ | $U_{23}$ | $U_{13}$ | $U_{12}$ |
|------|----------|----------|----------|----------|----------|----------|
| Se1  | 34.9(7)  | 17.3(6)  | 22.2(6)  | -1.9(4)  | -8.0(4)  | -1.6(4)  |
| K1   | 16.9(14) | 16.9(14) | 17.2(13) | 0        | 1.2(11)  | 0        |
| P1   | 13.0(16) | 20.8(17) | 10.6(15) | 0        | -2.7(13) | 0        |
| N1   | 13(6)    | 33(7)    | 16(6)    | 0        | -7(5)    | 0        |
| N2   | 18(6)    | 25(6)    | 18(6)    | 0        | -3(5)    | 0        |
| C4   | 17(7)    | 12(6)    | 19(7)    | 0        | 1(6)     | 0        |
| C5   | 3(6)     | 31(8)    | 29(8)    | 0        | -5(6)    | 0        |
| C2   | 26(8)    | 30(8)    | 14(6)    | 0        | 3(6)     | 0        |
| C3   | 44(7)    | 50(8)    | 35(6)    | 20(6)    | 3(6)     | -16(6)   |
| C1   | 14(7)    | 36(9)    | 31(8)    | 0        | 1(6)     | 0        |
| C11  | 34(8)    | 35(8)    | 32(8)    | 0(5)     | 1(5)     | 0(5)     |
| O1   | 25(5)    | 24(5)    | 21(5)    | 1(4)     | 6(4)     | 10(4)    |

|     |        |         |        |        |       |         |
|-----|--------|---------|--------|--------|-------|---------|
| C9  | 39(7)  | 33(7)   | 37(7)  | 1(5)   | -2(5) | -6(5)   |
| C19 | 24(6)  | 22(6)   | 23(6)  | -2(4)  | 4(4)  | 9(4)    |
| C12 | 26(6)  | 28(6)   | 28(6)  | 0(4)   | -1(5) | 1(4)    |
| O3  | 18(7)  | 16(7)   | 35(8)  | 7(6)   | -4(6) | 8(6)    |
| O2  | 33(9)  | 41(10)  | 19(7)  | 8(7)   | 5(7)  | 16(8)   |
| C10 | 48(8)  | 46(8)   | 49(8)  | -1(5)  | -1(5) | 0(5)    |
| C13 | 28(8)  | 30(8)   | 27(8)  | 0(5)   | 4(5)  | 2(5)    |
| O5  | 24(5)  | 25(5)   | 23(5)  | 1(4)   | 4(4)  | 7(4)    |
| O4  | 28(8)  | 37(8)   | 17(7)  | 1(6)   | 8(6)  | 22(6)   |
| C15 | 32(6)  | 23(6)   | 24(6)  | 0(5)   | 0(5)  | -3(5)   |
| C16 | 37(7)  | 34(7)   | 38(7)  | 1(5)   | -5(5) | -1(5)   |
| C14 | 33(6)  | 32(6)   | 32(6)  | 0(5)   | 1(5)  | 0(5)    |
| C21 | 36(7)  | 34(6)   | 34(7)  | 1(5)   | 2(5)  | 5(5)    |
| O6  | 33(9)  | 13(7)   | 35(9)  | 13(7)  | -7(7) | 4(7)    |
| C20 | 32(6)  | 30(6)   | 27(6)  | 1(5)   | 3(5)  | 2(5)    |
| C22 | 31(6)  | 33(6)   | 30(6)  | 1(5)   | 0(5)  | 0(5)    |
| C6  | 16(5)  | 20(7)   | 22(6)  | 0(4)   | 2(4)  | 7(4)    |
| C7  | 42(6)  | 52(6)   | 40(6)  | 0      | 4(4)  | 0       |
| C8  | 57(9)  | 60(9)   | 59(9)  | -2(5)  | 3(5)  | 1(5)    |
| C9A | 24(13) | 110(30) | 38(14) | -9(15) | 7(11) | -22(14) |

**Table 4 Bond Lengths for exp\_26.**

| Atom | Atom             | Length/Å  | Atom | Atom             | Length/Å  |
|------|------------------|-----------|------|------------------|-----------|
| Se1  | K1               | 3.484(3)  | O2   | C16 <sup>1</sup> | 1.01(2)   |
| Se1  | P1               | 2.127(2)  | O2   | O6 <sup>1</sup>  | 0.957(17) |
| K1   | O1               | 2.771(14) | O2   | C20              | 1.370(10) |
| K1   | O1 <sup>1</sup>  | 2.771(14) | C10  | O5 <sup>1</sup>  | 0.88(2)   |
| K1   | O3 <sup>1</sup>  | 2.812(13) | C10  | C15 <sup>1</sup> | 1.49(3)   |
| K1   | O3               | 2.812(13) | C10  | C14 <sup>1</sup> | 1.01(2)   |
| K1   | O2               | 2.922(16) | C13  | C11 <sup>1</sup> | 0.39(3)   |
| K1   | O2 <sup>1</sup>  | 2.922(16) | C13  | C12 <sup>1</sup> | 1.26(3)   |
| K1   | O5 <sup>1</sup>  | 2.962(14) | C13  | O3 <sup>1</sup>  | 1.54(3)   |
| K1   | O5               | 2.962(14) | C13  | O4               | 1.357(10) |
| K1   | O4 <sup>1</sup>  | 2.937(14) | C13  | C14              | 1.528(10) |
| K1   | O4               | 2.937(14) | O5   | C9 <sup>1</sup>  | 1.49(3)   |
| K1   | O6 <sup>1</sup>  | 2.825(14) | O5   | O3 <sup>1</sup>  | 0.958(16) |
| K1   | O6               | 2.825(14) | O5   | C10 <sup>1</sup> | 0.88(2)   |
| P1   | Se1 <sup>1</sup> | 2.127(2)  | O5   | C15              | 1.356(10) |
| P1   | C4               | 1.824(14) | O5   | C14              | 1.372(10) |

|     |                  |           |     |                  |           |
|-----|------------------|-----------|-----|------------------|-----------|
| P1  | C5               | 1.808(13) | O4  | C11 <sup>1</sup> | 1.40(3)   |
| N1  | N2               | 1.447(17) | O4  | C12 <sup>1</sup> | 0.930(17) |
| N1  | C5               | 1.300(19) | O4  | O4 <sup>1</sup>  | 0.98(3)   |
| N2  | C4               | 1.272(18) | C15 | C9 <sup>1</sup>  | 0.67(3)   |
| C4  | C2               | 1.56(2)   | C15 | O2 <sup>1</sup>  | 1.50(3)   |
| C5  | C6 <sup>1</sup>  | 1.56(2)   | C15 | C10 <sup>1</sup> | 1.49(3)   |
| C5  | C6               | 1.56(2)   | C15 | C16              | 1.512(10) |
| C2  | C3 <sup>1</sup>  | 1.540(14) | C16 | C9 <sup>1</sup>  | 1.60(3)   |
| C2  | C3               | 1.540(14) | C16 | O2 <sup>1</sup>  | 1.01(2)   |
| C2  | C1               | 1.50(2)   | C16 | O6               | 1.367(10) |
| C11 | C12              | 1.531(10) | C16 | C20 <sup>1</sup> | 1.01(2)   |
| C11 | O3               | 1.365(10) | C14 | C11 <sup>1</sup> | 1.21(3)   |
| C11 | C13 <sup>1</sup> | 0.39(3)   | C14 | O3 <sup>1</sup>  | 1.04(2)   |
| C11 | O4 <sup>1</sup>  | 1.40(3)   | C14 | C10 <sup>1</sup> | 1.01(2)   |
| C11 | C14 <sup>1</sup> | 1.21(3)   | C21 | O1 <sup>1</sup>  | 0.885(17) |
| O1  | O1 <sup>1</sup>  | 0.98(2)   | C21 | C19 <sup>1</sup> | 1.17(2)   |
| O1  | C19              | 1.369(9)  | C21 | C21 <sup>1</sup> | 1.11(3)   |
| O1  | C21 <sup>1</sup> | 0.885(17) | C21 | C22              | 1.529(10) |
| O1  | C21              | 1.368(10) | O6  | C19 <sup>1</sup> | 1.50(2)   |
| O1  | C22 <sup>1</sup> | 1.40(2)   | O6  | O2 <sup>1</sup>  | 0.957(17) |
| C9  | O2               | 1.359(10) | O6  | C20 <sup>1</sup> | 0.90(2)   |
| C9  | C10              | 1.517(10) | O6  | C22              | 1.371(10) |
| C9  | O5 <sup>1</sup>  | 1.49(3)   | C20 | C16 <sup>1</sup> | 1.01(2)   |
| C9  | C15 <sup>1</sup> | 0.67(3)   | C20 | O6 <sup>1</sup>  | 0.90(2)   |
| C9  | C16 <sup>1</sup> | 1.60(3)   | C20 | C22 <sup>1</sup> | 1.19(3)   |
| C19 | C21 <sup>1</sup> | 1.17(2)   | C22 | O1 <sup>1</sup>  | 1.40(2)   |
| C19 | O6 <sup>1</sup>  | 1.50(2)   | C22 | C19 <sup>1</sup> | 0.81(2)   |
| C19 | C20              | 1.526(10) | C22 | C20 <sup>1</sup> | 1.19(3)   |
| C19 | C22 <sup>1</sup> | 0.81(2)   | C6  | C6 <sup>1</sup>  | 0.62(3)   |
| C12 | C12 <sup>1</sup> | 1.04(3)   | C6  | C7               | 1.54(2)   |
| C12 | C13 <sup>1</sup> | 1.26(3)   | C6  | C8               | 1.532(10) |
| C12 | O4 <sup>1</sup>  | 0.930(17) | C6  | C9A <sup>1</sup> | 1.25(2)   |
| C12 | O4               | 1.369(9)  | C6  | C9A              | 1.532(10) |
| O3  | C10              | 1.364(10) | C7  | C6 <sup>1</sup>  | 1.54(2)   |
| O3  | C13 <sup>1</sup> | 1.54(3)   | C8  | C9A <sup>1</sup> | 1.34(4)   |
| O3  | O5 <sup>1</sup>  | 0.958(16) | C9A | C6 <sup>1</sup>  | 1.25(2)   |
| O3  | C14 <sup>1</sup> | 1.04(2)   | C9A | C8 <sup>1</sup>  | 1.34(4)   |
| O2  | C15 <sup>1</sup> | 1.50(3)   | C9A | C9A <sup>1</sup> | 1.26(6)   |

1+X,1/2-Y,+Z

**Table 5 Bond Angles for exp\_26.**

| Atom            | Atom | Atom            | Angle/°  | Atom             | Atom | Atom             | Angle/°   |
|-----------------|------|-----------------|----------|------------------|------|------------------|-----------|
| P1              | Se1  | K1              | 87.72(9) | C9               | O2   | C20              | 128.8(18) |
| O1              | K1   | O1 <sup>1</sup> | 20.4(5)  | C15 <sup>1</sup> | O2   | K1               | 112.4(9)  |
| O1              | K1   | O3 <sup>1</sup> | 136.0(4) | C16 <sup>1</sup> | O2   | K1               | 134.7(18) |
| O1 <sup>1</sup> | K1   | O3 <sup>1</sup> | 116.8(4) | C16 <sup>1</sup> | O2   | C9               | 83.7(18)  |
| O1              | K1   | O3              | 116.8(4) | C16 <sup>1</sup> | O2   | C15 <sup>1</sup> | 71.0(13)  |
| O1 <sup>1</sup> | K1   | O3              | 136.0(4) | C16 <sup>1</sup> | O2   | C20              | 47.4(12)  |
| O1 <sup>1</sup> | K1   | O2              | 78.7(4)  | O6 <sup>1</sup>  | O2   | K1               | 74.7(13)  |
| O1              | K1   | O2              | 59.4(4)  | O6 <sup>1</sup>  | O2   | C9               | 164(2)    |
| O1 <sup>1</sup> | K1   | O2 <sup>1</sup> | 59.4(4)  | O6 <sup>1</sup>  | O2   | C15 <sup>1</sup> | 156.5(18) |
| O1              | K1   | O2 <sup>1</sup> | 78.7(4)  | O6 <sup>1</sup>  | O2   | C16 <sup>1</sup> | 88.0(14)  |
| O1 <sup>1</sup> | K1   | O5              | 97.9(4)  | O6 <sup>1</sup>  | O2   | C20              | 40.7(12)  |
| O1 <sup>1</sup> | K1   | O5 <sup>1</sup> | 117.4(4) | C20              | O2   | K1               | 107.2(14) |
| O1              | K1   | O5              | 117.4(4) | C20              | O2   | C15 <sup>1</sup> | 118.0(14) |
| O1              | K1   | O5 <sup>1</sup> | 97.9(4)  | O3               | C10  | C9               | 114.3(19) |
| O1              | K1   | O4 <sup>1</sup> | 148.4(4) | O3               | C10  | C15 <sup>1</sup> | 107.2(18) |
| O1 <sup>1</sup> | K1   | O4 <sup>1</sup> | 155.5(4) | O5 <sup>1</sup>  | C10  | C9               | 71(2)     |
| O1 <sup>1</sup> | K1   | O4              | 148.4(4) | O5 <sup>1</sup>  | C10  | O3               | 44.3(11)  |
| O1              | K1   | O4              | 155.5(4) | O5 <sup>1</sup>  | C10  | C15 <sup>1</sup> | 63.8(17)  |
| O1 <sup>1</sup> | K1   | O6              | 40.3(4)  | O5 <sup>1</sup>  | C10  | C14 <sup>1</sup> | 92.6(17)  |
| O1              | K1   | O6              | 59.8(4)  | C15 <sup>1</sup> | C10  | C9               | 25.8(11)  |
| O1              | K1   | O6 <sup>1</sup> | 40.3(4)  | C14 <sup>1</sup> | C10  | C9               | 150(3)    |
| O1 <sup>1</sup> | K1   | O6 <sup>1</sup> | 59.8(4)  | C14 <sup>1</sup> | C10  | O3               | 49.3(13)  |
| O3 <sup>1</sup> | K1   | O3              | 99.1(5)  | C14 <sup>1</sup> | C10  | C15 <sup>1</sup> | 156(2)    |
| O3              | K1   | O2 <sup>1</sup> | 144.5(4) | C11 <sup>1</sup> | C13  | C12 <sup>1</sup> | 128(6)    |
| O3 <sup>1</sup> | K1   | O2 <sup>1</sup> | 57.4(4)  | C11 <sup>1</sup> | C13  | O3 <sup>1</sup>  | 57(5)     |
| O3 <sup>1</sup> | K1   | O2              | 144.5(4) | C11 <sup>1</sup> | C13  | O4               | 89(5)     |
| O3              | K1   | O2              | 57.4(4)  | C11 <sup>1</sup> | C13  | C14              | 29(5)     |
| O3              | K1   | O5 <sup>1</sup> | 18.9(3)  | C12 <sup>1</sup> | C13  | O3 <sup>1</sup>  | 116.7(18) |
| O3 <sup>1</sup> | K1   | O5 <sup>1</sup> | 116.3(4) | C12 <sup>1</sup> | C13  | O4               | 41.4(8)   |
| O3              | K1   | O5              | 116.3(4) | C12 <sup>1</sup> | C13  | C14              | 148.0(19) |
| O3 <sup>1</sup> | K1   | O5              | 18.9(3)  | O4               | C13  | O3 <sup>1</sup>  | 85.5(13)  |
| O3              | K1   | O4              | 59.1(4)  | O4               | C13  | C14              | 107.0(17) |
| O3 <sup>1</sup> | K1   | O4 <sup>1</sup> | 59.1(4)  | C14              | C13  | O3 <sup>1</sup>  | 39.7(10)  |
| O3 <sup>1</sup> | K1   | O4              | 40.0(4)  | C9 <sup>1</sup>  | O5   | K1               | 112.6(9)  |
| O3              | K1   | O4 <sup>1</sup> | 40.0(4)  | O3 <sup>1</sup>  | O5   | K1               | 71.7(11)  |
| O3 <sup>1</sup> | K1   | O6              | 76.5(4)  | O3 <sup>1</sup>  | O5   | C9 <sup>1</sup>  | 163.2(19) |
| O3              | K1   | O6              | 152.5(4) | O3 <sup>1</sup>  | O5   | C15              | 166.6(19) |



|                 |    |                  |            |                  |     |                  |           |
|-----------------|----|------------------|------------|------------------|-----|------------------|-----------|
| O3              | K1 | O6 <sup>1</sup>  | 76.5(4)    | O3 <sup>1</sup>  | O5  | C14              | 49.2(13)  |
| O3 <sup>1</sup> | K1 | O6 <sup>1</sup>  | 152.5(4)   | C10 <sup>1</sup> | O5  | K1               | 158(2)    |
| O2 <sup>1</sup> | K1 | O2               | 125.3(6)   | C10 <sup>1</sup> | O5  | C9 <sup>1</sup>  | 74.7(15)  |
| O2              | K1 | O5               | 147.3(4)   | C10 <sup>1</sup> | O5  | O3 <sup>1</sup>  | 95.6(16)  |
| O2 <sup>1</sup> | K1 | O5               | 38.7(4)    | C10 <sup>1</sup> | O5  | C15              | 80.4(19)  |
| O2 <sup>1</sup> | K1 | O5 <sup>1</sup>  | 147.3(4)   | C10 <sup>1</sup> | O5  | C14              | 47.5(15)  |
| O2              | K1 | O5 <sup>1</sup>  | 38.7(4)    | C15              | O5  | K1               | 116.0(11) |
| O2              | K1 | O4               | 110.4(4)   | C15              | O5  | C9 <sup>1</sup>  | 26.8(12)  |
| O2 <sup>1</sup> | K1 | O4 <sup>1</sup>  | 110.4(4)   | C15              | O5  | C14              | 127.9(16) |
| O2              | K1 | O4 <sup>1</sup>  | 93.1(4)    | C14              | O5  | K1               | 114.6(13) |
| O2 <sup>1</sup> | K1 | O4               | 93.1(4)    | C14              | O5  | C9 <sup>1</sup>  | 117.6(15) |
| O5 <sup>1</sup> | K1 | O5               | 131.8(5)   | C11 <sup>1</sup> | O4  | K1               | 110.4(10) |
| O4              | K1 | O5 <sup>1</sup>  | 76.5(4)    | C12              | O4  | K1               | 104.7(11) |
| O4 <sup>1</sup> | K1 | O5               | 76.5(4)    | C12 <sup>1</sup> | O4  | K1               | 123.9(18) |
| O4 <sup>1</sup> | K1 | O5 <sup>1</sup>  | 57.6(4)    | C12              | O4  | C11 <sup>1</sup> | 127.9(17) |
| O4              | K1 | O5               | 57.6(4)    | C12 <sup>1</sup> | O4  | C11 <sup>1</sup> | 79.2(16)  |
| O4 <sup>1</sup> | K1 | O4               | 19.1(5)    | C12 <sup>1</sup> | O4  | C12              | 49.1(19)  |
| O6 <sup>1</sup> | K1 | O2 <sup>1</sup>  | 111.3(5)   | C12 <sup>1</sup> | O4  | C13              | 63.9(16)  |
| O6              | K1 | O2 <sup>1</sup>  | 19.1(3)    | C12 <sup>1</sup> | O4  | O4 <sup>1</sup>  | 91.9(15)  |
| O6              | K1 | O2               | 111.3(5)   | C13              | O4  | K1               | 114.1(13) |
| O6 <sup>1</sup> | K1 | O2               | 19.1(3)    | C13              | O4  | C11 <sup>1</sup> | 15.9(15)  |
| O6              | K1 | O5 <sup>1</sup>  | 144.1(4)   | C13              | O4  | C12              | 113.0(14) |
| O6 <sup>1</sup> | K1 | O5 <sup>1</sup>  | 57.7(4)    | O4 <sup>1</sup>  | O4  | K1               | 80.4(3)   |
| O6 <sup>1</sup> | K1 | O5               | 144.1(4)   | O4 <sup>1</sup>  | O4  | C11 <sup>1</sup> | 168.6(9)  |
| O6              | K1 | O5               | 57.7(4)    | O4 <sup>1</sup>  | O4  | C12              | 42.8(9)   |
| O6              | K1 | O4               | 111.5(4)   | O4 <sup>1</sup>  | O4  | C13              | 155.7(11) |
| O6 <sup>1</sup> | K1 | O4               | 127.6(4)   | C9 <sup>1</sup>  | C15 | O2 <sup>1</sup>  | 65(2)     |
| O6 <sup>1</sup> | K1 | O4 <sup>1</sup>  | 111.5(4)   | C9 <sup>1</sup>  | C15 | C10 <sup>1</sup> | 79(2)     |
| O6              | K1 | O4 <sup>1</sup>  | 127.6(4)   | C9 <sup>1</sup>  | C15 | O5               | 88(3)     |
| O6 <sup>1</sup> | K1 | O6               | 94.9(6)    | C9 <sup>1</sup>  | C15 | C16              | 85(3)     |
| Se1             | P1 | Se1 <sup>1</sup> | 120.40(16) | O2 <sup>1</sup>  | C15 | C16              | 39.1(10)  |
| C4              | P1 | Se1              | 111.15(19) | C10 <sup>1</sup> | C15 | O2 <sup>1</sup>  | 112.8(16) |
| C4              | P1 | Se1 <sup>1</sup> | 111.15(19) | C10 <sup>1</sup> | C15 | C16              | 151.9(19) |
| C5              | P1 | Se1              | 111.5(2)   | O5               | C15 | O2 <sup>1</sup>  | 85.9(12)  |
| C5              | P1 | Se1 <sup>1</sup> | 111.5(2)   | O5               | C15 | C10 <sup>1</sup> | 35.7(9)   |
| C5              | P1 | C4               | 85.9(7)    | O5               | C15 | C16              | 121.0(16) |
| C5              | N1 | N2               | 112.3(11)  | O2 <sup>1</sup>  | C16 | C9 <sup>1</sup>  | 57.5(14)  |
| C4              | N2 | N1               | 114.9(11)  | O2 <sup>1</sup>  | C16 | C15              | 69.9(17)  |
| N2              | C4 | P1               | 113.0(10)  | O2 <sup>1</sup>  | C16 | O6               | 44.4(10)  |
| N2              | C4 | C2               | 120.4(12)  | O2 <sup>1</sup>  | C16 | C20 <sup>1</sup> | 85.3(15)  |

|                  |     |                  |           |                  |     |                  |           |
|------------------|-----|------------------|-----------|------------------|-----|------------------|-----------|
| C2               | C4  | P1               | 126.6(10) | C15              | C16 | C9 <sup>1</sup>  | 24.7(11)  |
| N1               | C5  | P1               | 113.9(11) | O6               | C16 | C9 <sup>1</sup>  | 101.0(16) |
| N1               | C5  | C6 <sup>1</sup>  | 118.2(12) | O6               | C16 | C15              | 113.6(18) |
| N1               | C5  | C6               | 118.2(12) | C20 <sup>1</sup> | C16 | C9 <sup>1</sup>  | 140(2)    |
| C6 <sup>1</sup>  | C5  | P1               | 126.4(11) | C20 <sup>1</sup> | C16 | C15              | 154(2)    |
| C6               | C5  | P1               | 126.4(11) | C20 <sup>1</sup> | C16 | O6               | 41.0(12)  |
| C6 <sup>1</sup>  | C5  | C6               | 22.8(11)  | C11 <sup>1</sup> | C14 | C13              | 8.9(19)   |
| C3 <sup>1</sup>  | C2  | C4               | 107.7(9)  | C11 <sup>1</sup> | C14 | O5               | 118.5(19) |
| C3               | C2  | C4               | 107.7(9)  | O3 <sup>1</sup>  | C14 | C11 <sup>1</sup> | 74.4(16)  |
| C3               | C2  | C3 <sup>1</sup>  | 111.0(14) | O3 <sup>1</sup>  | C14 | C13              | 70.7(18)  |
| C1               | C2  | C4               | 113.1(12) | O3 <sup>1</sup>  | C14 | O5               | 44.2(10)  |
| C1               | C2  | C3 <sup>1</sup>  | 108.7(9)  | C10 <sup>1</sup> | C14 | C11 <sup>1</sup> | 157(2)    |
| C1               | C2  | C3               | 108.7(9)  | C10 <sup>1</sup> | C14 | O3 <sup>1</sup>  | 83.3(15)  |
| O3               | C11 | C12              | 111.1(17) | C10 <sup>1</sup> | C14 | C13              | 150(3)    |
| O3               | C11 | O4 <sup>1</sup>  | 90.8(14)  | C10 <sup>1</sup> | C14 | O5               | 40.0(13)  |
| C13 <sup>1</sup> | C11 | C12              | 41(4)     | O5               | C14 | C13              | 114.7(18) |
| C13 <sup>1</sup> | C11 | O3               | 110(6)    | O1 <sup>1</sup>  | C21 | O1               | 45.5(15)  |
| C13 <sup>1</sup> | C11 | O4 <sup>1</sup>  | 75(4)     | O1 <sup>1</sup>  | C21 | C19 <sup>1</sup> | 82.1(17)  |
| C13 <sup>1</sup> | C11 | C14 <sup>1</sup> | 142(7)    | O1 <sup>1</sup>  | C21 | C21 <sup>1</sup> | 85.7(15)  |
| O4 <sup>1</sup>  | C11 | C12              | 36.6(8)   | O1 <sup>1</sup>  | C21 | C22              | 64.7(16)  |
| C14 <sup>1</sup> | C11 | C12              | 157(2)    | O1               | C21 | C22              | 109.6(16) |
| C14 <sup>1</sup> | C11 | O3               | 47.3(11)  | C19 <sup>1</sup> | C21 | O1               | 125.3(19) |
| C14 <sup>1</sup> | C11 | O4 <sup>1</sup>  | 126(2)    | C19 <sup>1</sup> | C21 | C22              | 31.3(12)  |
| O1 <sup>1</sup>  | O1  | K1               | 79.8(3)   | C21 <sup>1</sup> | C21 | O1               | 40.2(9)   |
| O1 <sup>1</sup>  | O1  | C19              | 147.9(10) | C21 <sup>1</sup> | C21 | C19 <sup>1</sup> | 158.8(15) |
| O1 <sup>1</sup>  | O1  | C21              | 40.2(9)   | C21 <sup>1</sup> | C21 | C22              | 148.8(11) |
| O1 <sup>1</sup>  | O1  | C22 <sup>1</sup> | 168.9(9)  | C19 <sup>1</sup> | O6  | K1               | 113.0(8)  |
| C19              | O1  | K1               | 121.8(11) | O2 <sup>1</sup>  | O6  | K1               | 86.2(13)  |
| C19              | O1  | C22 <sup>1</sup> | 33.8(11)  | O2 <sup>1</sup>  | O6  | C19 <sup>1</sup> | 159.7(17) |
| C21              | O1  | K1               | 118.5(10) | O2 <sup>1</sup>  | O6  | C16              | 47.6(13)  |
| C21 <sup>1</sup> | O1  | K1               | 164(2)    | O2 <sup>1</sup>  | O6  | C22              | 151.3(18) |
| C21 <sup>1</sup> | O1  | O1 <sup>1</sup>  | 94.3(15)  | C16              | O6  | K1               | 120.0(13) |
| C21              | O1  | C19              | 110.2(13) | C16              | O6  | C19 <sup>1</sup> | 120.6(14) |
| C21 <sup>1</sup> | O1  | C19              | 58.0(15)  | C16              | O6  | C22              | 105.1(15) |
| C21 <sup>1</sup> | O1  | C21              | 54(2)     | C20 <sup>1</sup> | O6  | K1               | 142(2)    |
| C21              | O1  | C22 <sup>1</sup> | 133.7(15) | C20 <sup>1</sup> | O6  | C19 <sup>1</sup> | 74.2(14)  |
| C21 <sup>1</sup> | O1  | C22 <sup>1</sup> | 80.5(14)  | C20 <sup>1</sup> | O6  | O2 <sup>1</sup>  | 95.2(16)  |
| C22 <sup>1</sup> | O1  | K1               | 107.7(11) | C20 <sup>1</sup> | O6  | C16              | 47.7(13)  |
| O2               | C9  | C10              | 119.9(18) | C20 <sup>1</sup> | O6  | C22              | 59.1(16)  |
| O2               | C9  | O5 <sup>1</sup>  | 86.3(14)  | C22              | O6  | K1               | 106.1(12) |

|                  |     |                  |           |                  |     |                  |           |
|------------------|-----|------------------|-----------|------------------|-----|------------------|-----------|
| O2               | C9  | C16 <sup>1</sup> | 38.8(9)   | C22              | O6  | C19 <sup>1</sup> | 32.2(11)  |
| C10              | C9  | C16 <sup>1</sup> | 138(2)    | O2               | C20 | C19              | 113.5(17) |
| O5 <sup>1</sup>  | C9  | C10              | 34.1(10)  | C16 <sup>1</sup> | C20 | C19              | 158(2)    |
| O5 <sup>1</sup>  | C9  | C16 <sup>1</sup> | 107.8(17) | C16 <sup>1</sup> | C20 | O2               | 47.3(13)  |
| C15 <sup>1</sup> | C9  | O2               | 89(3)     | C16 <sup>1</sup> | C20 | C22 <sup>1</sup> | 161(3)    |
| C15 <sup>1</sup> | C9  | C10              | 75(3)     | O6 <sup>1</sup>  | C20 | C19              | 71.3(18)  |
| C15 <sup>1</sup> | C9  | O5 <sup>1</sup>  | 66(2)     | O6 <sup>1</sup>  | C20 | O2               | 44.1(11)  |
| C15 <sup>1</sup> | C9  | C16 <sup>1</sup> | 70(2)     | O6 <sup>1</sup>  | C20 | C16 <sup>1</sup> | 91.2(16)  |
| O1               | C19 | O6 <sup>1</sup>  | 84.2(12)  | O6 <sup>1</sup>  | C20 | C22 <sup>1</sup> | 80.6(19)  |
| O1               | C19 | C20              | 107.5(16) | C22 <sup>1</sup> | C20 | C19              | 31.6(12)  |
| C21 <sup>1</sup> | C19 | O1               | 39.8(8)   | C22 <sup>1</sup> | C20 | O2               | 123(2)    |
| C21 <sup>1</sup> | C19 | O6 <sup>1</sup>  | 123.2(16) | O1 <sup>1</sup>  | C22 | C21              | 34.8(8)   |
| C21 <sup>1</sup> | C19 | C20              | 145(2)    | C19 <sup>1</sup> | C22 | O1 <sup>1</sup>  | 70.9(17)  |
| O6 <sup>1</sup>  | C19 | C20              | 34.5(9)   | C19 <sup>1</sup> | C22 | C21              | 49.1(17)  |
| C22 <sup>1</sup> | C19 | O1               | 75(2)     | C19 <sup>1</sup> | C22 | O6               | 83(2)     |
| C22 <sup>1</sup> | C19 | C21 <sup>1</sup> | 100(2)    | C19 <sup>1</sup> | C22 | C20 <sup>1</sup> | 98(2)     |
| C22 <sup>1</sup> | C19 | O6 <sup>1</sup>  | 64.9(16)  | O6               | C22 | O1 <sup>1</sup>  | 88.1(14)  |
| C22 <sup>1</sup> | C19 | C20              | 50.7(18)  | O6               | C22 | C21              | 108.8(17) |
| C12 <sup>1</sup> | C12 | C11              | 151.4(13) | C20 <sup>1</sup> | C22 | O1 <sup>1</sup>  | 128.4(17) |
| C12 <sup>1</sup> | C12 | C13 <sup>1</sup> | 162.7(12) | C20 <sup>1</sup> | C22 | C21              | 142(2)    |
| C12 <sup>1</sup> | C12 | O4               | 42.8(9)   | C20 <sup>1</sup> | C22 | O6               | 40.3(10)  |
| C13 <sup>1</sup> | C12 | C11              | 11.4(16)  | C6 <sup>1</sup>  | C6  | C5               | 78.6(6)   |
| C13 <sup>1</sup> | C12 | O4               | 120.0(18) | C6 <sup>1</sup>  | C6  | C7               | 78.4(6)   |
| O4 <sup>1</sup>  | C12 | C11              | 64.2(18)  | C6 <sup>1</sup>  | C6  | C8               | 160.6(14) |
| O4               | C12 | C11              | 109.2(16) | C6 <sup>1</sup>  | C6  | C9A <sup>1</sup> | 104.8(18) |
| O4 <sup>1</sup>  | C12 | C12 <sup>1</sup> | 88.1(15)  | C6 <sup>1</sup>  | C6  | C9A              | 52.3(14)  |
| O4 <sup>1</sup>  | C12 | C13 <sup>1</sup> | 74.7(15)  | C7               | C6  | C5               | 110.3(13) |
| O4 <sup>1</sup>  | C12 | O4               | 45.4(16)  | C8               | C6  | C5               | 113.7(16) |
| C11              | O3  | K1               | 118.7(12) | C8               | C6  | C7               | 108.9(17) |
| C11              | O3  | C13 <sup>1</sup> | 13.7(16)  | C8               | C6  | C9A              | 109(2)    |
| C10              | O3  | K1               | 127.0(13) | C9A              | C6  | C5               | 104.7(15) |
| C10              | O3  | C11              | 105.6(15) | C9A <sup>1</sup> | C6  | C5               | 120.6(19) |
| C10              | O3  | C13 <sup>1</sup> | 115.7(16) | C9A              | C6  | C7               | 110.4(16) |
| C13 <sup>1</sup> | O3  | K1               | 113.5(9)  | C9A <sup>1</sup> | C6  | C7               | 128.8(19) |
| O5 <sup>1</sup>  | O3  | K1               | 89.4(12)  | C9A <sup>1</sup> | C6  | C8               | 56.3(19)  |
| O5 <sup>1</sup>  | O3  | C11              | 144.8(17) | C9A <sup>1</sup> | C6  | C9A              | 53(3)     |
| O5 <sup>1</sup>  | O3  | C10              | 40.1(13)  | C6               | C7  | C6 <sup>1</sup>  | 23.1(12)  |
| O5 <sup>1</sup>  | O3  | C13 <sup>1</sup> | 155.8(17) | C9A <sup>1</sup> | C8  | C6               | 51.3(9)   |
| O5 <sup>1</sup>  | O3  | C14 <sup>1</sup> | 86.6(14)  | C6 <sup>1</sup>  | C9A | C6               | 22.9(13)  |
| C14 <sup>1</sup> | O3  | K1               | 149.7(17) | C6 <sup>1</sup>  | C9A | C8 <sup>1</sup>  | 72.4(17)  |

|                  |    |                  |           |                  |     |                  |           |
|------------------|----|------------------|-----------|------------------|-----|------------------|-----------|
| C14 <sup>1</sup> | O3 | C11              | 58.3(14)  | C6 <sup>1</sup>  | C9A | C9A <sup>1</sup> | 75.2(18)  |
| C14 <sup>1</sup> | O3 | C10              | 47.5(14)  | C8 <sup>1</sup>  | C9A | C6               | 95(2)     |
| C14 <sup>1</sup> | O3 | C13 <sup>1</sup> | 69.7(13)  | C9A <sup>1</sup> | C9A | C6               | 52.3(14)  |
| C9               | O2 | K1               | 120.2(12) | C9A <sup>1</sup> | C9A | C8 <sup>1</sup>  | 147.1(14) |
| C9               | O2 | C15 <sup>1</sup> | 26.6(12)  |                  |     |                  |           |

1+X,1/2-Y,+Z

**Table 6 Torsion Angles for exp\_26.**

| A                | B   | C   | D                | Angle/°   | A                | B   | C   | D                | Angle/°   |
|------------------|-----|-----|------------------|-----------|------------------|-----|-----|------------------|-----------|
| Se1 <sup>1</sup> | P1  | C4  | N2               | -111.5(2) | O2 <sup>1</sup>  | O6  | C22 | O1 <sup>1</sup>  | 149(4)    |
| Se1              | P1  | C4  | N2               | 111.5(2)  | O2 <sup>1</sup>  | O6  | C22 | C19 <sup>1</sup> | -140(4)   |
| Se1 <sup>1</sup> | P1  | C4  | C2               | 68.5(2)   | O2 <sup>1</sup>  | O6  | C22 | C21              | 178(4)    |
| Se1              | P1  | C4  | C2               | -68.5(2)  | O2 <sup>1</sup>  | O6  | C22 | C20 <sup>1</sup> | -29(4)    |
| Se1              | P1  | C5  | N1               | -111.2(2) | C10              | C9  | O2  | K1               | -8(3)     |
| Se1 <sup>1</sup> | P1  | C5  | N1               | 111.2(2)  | C10              | C9  | O2  | C15 <sup>1</sup> | 72(3)     |
| Se1 <sup>1</sup> | P1  | C5  | C6 <sup>1</sup>  | -54.6(8)  | C10              | C9  | O2  | C16 <sup>1</sup> | 131(3)    |
| Se1              | P1  | C5  | C6               | 54.6(8)   | C10              | C9  | O2  | O6 <sup>1</sup>  | -171(7)   |
| Se1              | P1  | C5  | C6 <sup>1</sup>  | 83.1(7)   | C10              | C9  | O2  | C20              | 147(2)    |
| Se1 <sup>1</sup> | P1  | C5  | C6               | -83.1(7)  | C10 <sup>1</sup> | O5  | C15 | C9 <sup>1</sup>  | -75(3)    |
| K1               | Se1 | P1  | Se1 <sup>1</sup> | -3.83(18) | C10 <sup>1</sup> | O5  | C15 | O2 <sup>1</sup>  | -140(2)   |
| K1               | Se1 | P1  | C4               | 128.7(5)  | C10 <sup>1</sup> | O5  | C15 | C16              | -158(3)   |
| K1               | Se1 | P1  | C5               | -137.3(5) | C10 <sup>1</sup> | O5  | C14 | C11 <sup>1</sup> | -169(4)   |
| K1               | O1  | C19 | C21 <sup>1</sup> | 161(2)    | C10 <sup>1</sup> | O5  | C14 | O3 <sup>1</sup>  | -165(4)   |
| K1               | O1  | C19 | O6 <sup>1</sup>  | -8.2(15)  | C10 <sup>1</sup> | O5  | C14 | C13              | -160(4)   |
| K1               | O1  | C19 | C20              | -34(2)    | C10 <sup>1</sup> | C15 | C16 | C9 <sup>1</sup>  | 56(4)     |
| K1               | O1  | C19 | C22 <sup>1</sup> | -74(2)    | C10 <sup>1</sup> | C15 | C16 | O2 <sup>1</sup>  | 1(5)      |
| K1               | O1  | C21 | O1 <sup>1</sup>  | 17(2)     | C10 <sup>1</sup> | C15 | C16 | O6               | -7(6)     |
| K1               | O1  | C21 | C19 <sup>1</sup> | -4(3)     | C10 <sup>1</sup> | C15 | C16 | C20 <sup>1</sup> | -15(10)   |
| K1               | O1  | C21 | C21 <sup>1</sup> | -163(2)   | C13 <sup>1</sup> | C11 | C12 | C12 <sup>1</sup> | 171(7)    |
| K1               | O1  | C21 | C22              | 27(2)     | C13 <sup>1</sup> | C11 | C12 | O4               | 162(8)    |
| K1               | O3  | C10 | C9               | 10(3)     | C13 <sup>1</sup> | C11 | C12 | O4 <sup>1</sup>  | 156(9)    |
| K1               | O3  | C10 | O5 <sup>1</sup>  | 24(3)     | C13 <sup>1</sup> | C11 | O3  | K1               | -71(6)    |
| K1               | O3  | C10 | C15 <sup>1</sup> | 36(3)     | C13 <sup>1</sup> | C11 | O3  | C10              | 139(6)    |
| K1               | O3  | C10 | C14 <sup>1</sup> | -141(2)   | C13 <sup>1</sup> | C11 | O3  | O5 <sup>1</sup>  | 150(5)    |
| K1               | O2  | C20 | C19              | -56.8(19) | C13 <sup>1</sup> | C11 | O3  | C14 <sup>1</sup> | 144(7)    |
| K1               | O2  | C20 | C16 <sup>1</sup> | 136(2)    | C13 <sup>1</sup> | C12 | O4  | K1               | -60(3)    |
| K1               | O2  | C20 | O6 <sup>1</sup>  | -39(2)    | C13 <sup>1</sup> | C12 | O4  | C11 <sup>1</sup> | 168(2)    |
| K1               | O2  | C20 | C22 <sup>1</sup> | -23(3)    | C13 <sup>1</sup> | C12 | O4  | C12 <sup>1</sup> | 177.3(17) |

|    |    |     |                  |            |                  |     |     |                  |            |
|----|----|-----|------------------|------------|------------------|-----|-----|------------------|------------|
| K1 | O5 | C15 | C9 <sup>1</sup>  | 89(2)      | C13 <sup>1</sup> | C12 | O4  | C13              | 175(3)     |
| K1 | O5 | C15 | O2 <sup>1</sup>  | 24.0(17)   | C13 <sup>1</sup> | C12 | O4  | O4 <sup>1</sup>  | -2.7(17)   |
| K1 | O5 | C15 | C10 <sup>1</sup> | 164(3)     | C13 <sup>1</sup> | O3  | C10 | C9               | 166(2)     |
| K1 | O5 | C15 | C16              | 6(3)       | C13 <sup>1</sup> | O3  | C10 | O5 <sup>1</sup>  | -180(2)    |
| K1 | O5 | C14 | C11 <sup>1</sup> | 28(3)      | C13 <sup>1</sup> | O3  | C10 | C15 <sup>1</sup> | -167.6(18) |
| K1 | O5 | C14 | O3 <sup>1</sup>  | 31.5(17)   | C13 <sup>1</sup> | O3  | C10 | C14 <sup>1</sup> | 15(3)      |
| K1 | O5 | C14 | C10 <sup>1</sup> | -164(3)    | O5 <sup>1</sup>  | K1  | O1  | O1 <sup>1</sup>  | 164.0(3)   |
| K1 | O5 | C14 | C13              | 37(2)      | O5               | K1  | O1  | O1 <sup>1</sup>  | 17.9(3)    |
| K1 | O6 | C22 | O1 <sup>1</sup>  | 36.7(14)   | O5 <sup>1</sup>  | K1  | O1  | C19              | 9.7(14)    |
| K1 | O6 | C22 | C19 <sup>1</sup> | 107.6(19)  | O5               | K1  | O1  | C19              | -136.4(13) |
| K1 | O6 | C22 | C21              | 65.2(18)   | O5 <sup>1</sup>  | K1  | O1  | C21              | 152.8(15)  |
| K1 | O6 | C22 | C20 <sup>1</sup> | -142(2)    | O5 <sup>1</sup>  | K1  | O1  | C21 <sup>1</sup> | 94(6)      |
| P1 | C4 | C2  | C3 <sup>1</sup>  | -120.1(9)  | O5               | K1  | O1  | C21 <sup>1</sup> | -52(7)     |
| P1 | C4 | C2  | C3               | 120.1(9)   | O5               | K1  | O1  | C21              | 6.7(16)    |
| P1 | C4 | C2  | C1               | 0.000(3)   | O5               | K1  | O1  | C22 <sup>1</sup> | -170.5(12) |
| P1 | C5 | C6  | C6 <sup>1</sup>  | 98.6(6)    | O5 <sup>1</sup>  | K1  | O1  | C22 <sup>1</sup> | -24.4(13)  |
| P1 | C5 | C6  | C7               | 25.6(12)   | O5 <sup>1</sup>  | K1  | O3  | C11              | -158(2)    |
| P1 | C5 | C6  | C8               | -97.2(18)  | O5               | K1  | O3  | C11              | -9.3(18)   |
| P1 | C5 | C6  | C9A              | 144.3(14)  | O5               | K1  | O3  | C10              | 133.4(18)  |
| P1 | C5 | C6  | C9A <sup>1</sup> | -161(2)    | O5 <sup>1</sup>  | K1  | O3  | C10              | -15.2(19)  |
| N1 | N2 | C4  | P1               | 0.000(2)   | O5               | K1  | O3  | C13 <sup>1</sup> | -23.4(14)  |
| N1 | N2 | C4  | C2               | 180.000(3) | O5 <sup>1</sup>  | K1  | O3  | C13 <sup>1</sup> | -172(2)    |
| N1 | C5 | C6  | C6 <sup>1</sup>  | -96.2(4)   | O5               | K1  | O3  | O5 <sup>1</sup>  | 148.6(13)  |
| N1 | C5 | C6  | C7               | -169.2(6)  | O5 <sup>1</sup>  | K1  | O3  | C14 <sup>1</sup> | -82(3)     |
| N1 | C5 | C6  | C8               | 68.1(18)   | O5               | K1  | O3  | C14 <sup>1</sup> | 66(3)      |
| N1 | C5 | C6  | C9A <sup>1</sup> | 4(2)       | O5 <sup>1</sup>  | K1  | O2  | C9               | 11.4(16)   |
| N1 | C5 | C6  | C9A              | -50.5(16)  | O5               | K1  | O2  | C9               | -80.3(19)  |
| N2 | N1 | C5  | P1               | 0.000(2)   | O5               | K1  | O2  | C15 <sup>1</sup> | -108.8(13) |
| N2 | N1 | C5  | C6 <sup>1</sup>  | 167.0(7)   | O5 <sup>1</sup>  | K1  | O2  | C15 <sup>1</sup> | -17.0(12)  |
| N2 | N1 | C5  | C6               | -167.0(7)  | O5 <sup>1</sup>  | K1  | O2  | C16 <sup>1</sup> | -102(2)    |
| N2 | C4 | C2  | C3 <sup>1</sup>  | 59.9(9)    | O5               | K1  | O2  | C16 <sup>1</sup> | 166.2(18)  |
| N2 | C4 | C2  | C3               | -59.9(9)   | O5 <sup>1</sup>  | K1  | O2  | O6 <sup>1</sup>  | -173.3(16) |
| N2 | C4 | C2  | C1               | 180.000(3) | O5               | K1  | O2  | O6 <sup>1</sup>  | 95.0(14)   |
| C4 | P1 | C5  | N1               | 0.000(2)   | O5 <sup>1</sup>  | K1  | O2  | C20              | -148.4(14) |
| C4 | P1 | C5  | C6 <sup>1</sup>  | -165.8(7)  | O5               | K1  | O2  | C20              | 119.9(12)  |
| C4 | P1 | C5  | C6               | 165.8(7)   | O5 <sup>1</sup>  | K1  | O5  | C9 <sup>1</sup>  | -123.8(14) |
| C5 | P1 | C4  | N2               | 0.000(2)   | O5 <sup>1</sup>  | K1  | O5  | O3 <sup>1</sup>  | 38.9(16)   |
| C5 | P1 | C4  | C2               | 180.000(2) | O5 <sup>1</sup>  | K1  | O5  | C10 <sup>1</sup> | -19(5)     |
| C5 | N1 | N2  | C4               | 0.000(3)   | O5 <sup>1</sup>  | K1  | O5  | C15              | -153.0(13) |
| C5 | C6 | C7  | C6 <sup>1</sup>  | 73.1(9)    | O5 <sup>1</sup>  | K1  | O5  | C14              | 14.2(18)   |

|                  |     |     |                  |            |                 |     |     |                  |            |
|------------------|-----|-----|------------------|------------|-----------------|-----|-----|------------------|------------|
| C5               | C6  | C8  | C9A <sup>1</sup> | -112(2)    | O5              | K1  | O4  | C11 <sup>1</sup> | -11.9(15)  |
| C5               | C6  | C9A | C6 <sup>1</sup>  | -62.5(15)  | O5 <sup>1</sup> | K1  | O4  | C11 <sup>1</sup> | -176.6(16) |
| C5               | C6  | C9A | C8 <sup>1</sup>  | -67(2)     | O5              | K1  | O4  | C12              | -152.7(12) |
| C5               | C6  | C9A | C9A <sup>1</sup> | 117.5(15)  | O5              | K1  | O4  | C12 <sup>1</sup> | -102(2)    |
| C11              | C12 | O4  | K1               | -64.4(17)  | O5 <sup>1</sup> | K1  | O4  | C12 <sup>1</sup> | 93(2)      |
| C11              | C12 | O4  | C11 <sup>1</sup> | 164(3)     | O5 <sup>1</sup> | K1  | O4  | C12              | 42.6(11)   |
| C11              | C12 | O4  | C12 <sup>1</sup> | 173.2(10)  | O5 <sup>1</sup> | K1  | O4  | C13              | 166.7(14)  |
| C11              | C12 | O4  | C13              | 170.9(17)  | O5              | K1  | O4  | C13              | -28.6(13)  |
| C11              | C12 | O4  | O4 <sup>1</sup>  | -6.8(10)   | O5              | K1  | O4  | O4 <sup>1</sup>  | 171.8(4)   |
| C11              | O3  | C10 | C9               | 156(2)     | O5 <sup>1</sup> | K1  | O4  | O4 <sup>1</sup>  | 7.1(3)     |
| C11              | O3  | C10 | O5 <sup>1</sup>  | 171(3)     | O5              | K1  | O6  | C19 <sup>1</sup> | -177.9(13) |
| C11              | O3  | C10 | C15 <sup>1</sup> | -177(2)    | O5 <sup>1</sup> | K1  | O6  | C19 <sup>1</sup> | -59.8(14)  |
| C11              | O3  | C10 | C14 <sup>1</sup> | 6(3)       | O5 <sup>1</sup> | K1  | O6  | O2 <sup>1</sup>  | 113.2(13)  |
| C11 <sup>1</sup> | C13 | O4  | K1               | 80(6)      | O5              | K1  | O6  | O2 <sup>1</sup>  | -5.0(12)   |
| C11 <sup>1</sup> | C13 | O4  | C12 <sup>1</sup> | -163(6)    | O5              | K1  | O6  | C16              | 30.1(14)   |
| C11 <sup>1</sup> | C13 | O4  | C12              | -161(5)    | O5 <sup>1</sup> | K1  | O6  | C16              | 148.2(14)  |
| C11 <sup>1</sup> | C13 | O4  | O4 <sup>1</sup>  | -157(4)    | O5              | K1  | O6  | C20 <sup>1</sup> | 89(3)      |
| C11 <sup>1</sup> | C13 | C14 | O3 <sup>1</sup>  | -114(9)    | O5 <sup>1</sup> | K1  | O6  | C20 <sup>1</sup> | -153(2)    |
| C11 <sup>1</sup> | C13 | C14 | C10 <sup>1</sup> | -144(10)   | O5 <sup>1</sup> | K1  | O6  | C22              | -93.2(13)  |
| C11 <sup>1</sup> | C13 | C14 | O5               | -118(10)   | O5              | K1  | O6  | C22              | 148.7(13)  |
| O1 <sup>1</sup>  | K1  | O1  | C19              | -154.3(13) | O5 <sup>1</sup> | C9  | O2  | K1               | -14(2)     |
| O1 <sup>1</sup>  | K1  | O1  | C21 <sup>1</sup> | -70(6)     | O5 <sup>1</sup> | C9  | O2  | C15 <sup>1</sup> | 66(2)      |
| O1 <sup>1</sup>  | K1  | O1  | C21              | -11.2(15)  | O5 <sup>1</sup> | C9  | O2  | C16 <sup>1</sup> | 125(2)     |
| O1 <sup>1</sup>  | K1  | O1  | C22 <sup>1</sup> | 171.6(12)  | O5 <sup>1</sup> | C9  | O2  | O6 <sup>1</sup>  | -177(7)    |
| O1 <sup>1</sup>  | K1  | O3  | C11              | -146.4(16) | O5 <sup>1</sup> | C9  | O2  | C20              | 140.7(19)  |
| O1               | K1  | O3  | C11              | -154.8(17) | O5 <sup>1</sup> | C9  | C10 | O3               | 10.7(15)   |
| O1 <sup>1</sup>  | K1  | O3  | C10              | -4(2)      | O5 <sup>1</sup> | C9  | C10 | C15 <sup>1</sup> | -69(3)     |
| O1               | K1  | O3  | C10              | -12.1(19)  | O5 <sup>1</sup> | C9  | C10 | C14 <sup>1</sup> | 60(5)      |
| O1 <sup>1</sup>  | K1  | O3  | C13 <sup>1</sup> | -160.5(12) | O5 <sup>1</sup> | O3  | C10 | C9               | -15(2)     |
| O1               | K1  | O3  | C13 <sup>1</sup> | -168.9(12) | O5 <sup>1</sup> | O3  | C10 | C15 <sup>1</sup> | 12.1(18)   |
| O1 <sup>1</sup>  | K1  | O3  | O5 <sup>1</sup>  | 11.5(14)   | O5 <sup>1</sup> | O3  | C10 | C14 <sup>1</sup> | -165(4)    |
| O1               | K1  | O3  | O5 <sup>1</sup>  | 3.1(13)    | O5              | C15 | C16 | C9 <sup>1</sup>  | 84(3)      |
| O1               | K1  | O3  | C14 <sup>1</sup> | -79(3)     | O5              | C15 | C16 | O2 <sup>1</sup>  | 29(3)      |
| O1 <sup>1</sup>  | K1  | O3  | C14 <sup>1</sup> | -71(3)     | O5              | C15 | C16 | O6               | 21(3)      |
| O1 <sup>1</sup>  | K1  | O2  | C9               | -167.4(18) | O5              | C15 | C16 | C20 <sup>1</sup> | 13(8)      |
| O1               | K1  | O2  | C9               | -174.2(18) | O4 <sup>1</sup> | K1  | O1  | O1 <sup>1</sup>  | 127.8(7)   |
| O1               | K1  | O2  | C15 <sup>1</sup> | 157.4(14)  | O4              | K1  | O1  | O1 <sup>1</sup>  | 89.3(8)    |
| O1 <sup>1</sup>  | K1  | O2  | C15 <sup>1</sup> | 164.2(13)  | O4              | K1  | O1  | C19              | -65.0(17)  |
| O1 <sup>1</sup>  | K1  | O2  | C16 <sup>1</sup> | 79(2)      | O4 <sup>1</sup> | K1  | O1  | C19              | -26.5(17)  |
| O1               | K1  | O2  | C16 <sup>1</sup> | 72(2)      | O4              | K1  | O1  | C21              | 78.0(17)   |

|                 |    |     |                  |            |                 |    |    |                  |            |
|-----------------|----|-----|------------------|------------|-----------------|----|----|------------------|------------|
| O1 <sup>1</sup> | K1 | O2  | O6 <sup>1</sup>  | 7.9(13)    | O4 <sup>1</sup> | K1 | O1 | C21              | 116.6(15)  |
| O1              | K1 | O2  | O6 <sup>1</sup>  | 1.1(12)    | O4 <sup>1</sup> | K1 | O1 | C21 <sup>1</sup> | 58(7)      |
| O1 <sup>1</sup> | K1 | O2  | C20              | 32.8(12)   | O4              | K1 | O1 | C21 <sup>1</sup> | 19(7)      |
| O1              | K1 | O2  | C20              | 26.0(11)   | O4 <sup>1</sup> | K1 | O1 | C22 <sup>1</sup> | -60.6(15)  |
| O1 <sup>1</sup> | K1 | O5  | C9 <sup>1</sup>  | 14.6(15)   | O4              | K1 | O1 | C22 <sup>1</sup> | -99.2(14)  |
| O1              | K1 | O5  | C9 <sup>1</sup>  | 8.4(15)    | O4              | K1 | O3 | C11              | -2.4(17)   |
| O1 <sup>1</sup> | K1 | O5  | O3 <sup>1</sup>  | 177.2(12)  | O4 <sup>1</sup> | K1 | O3 | C11              | -2.8(17)   |
| O1              | K1 | O5  | O3 <sup>1</sup>  | 171.0(11)  | O4              | K1 | O3 | C10              | 140.3(19)  |
| O1 <sup>1</sup> | K1 | O5  | C10 <sup>1</sup> | 119(5)     | O4 <sup>1</sup> | K1 | O3 | C10              | 140(2)     |
| O1              | K1 | O5  | C10 <sup>1</sup> | 113(5)     | O4              | K1 | O3 | C13 <sup>1</sup> | -16.5(12)  |
| O1              | K1 | O5  | C15              | -20.8(16)  | O4 <sup>1</sup> | K1 | O3 | C13 <sup>1</sup> | -16.9(12)  |
| O1 <sup>1</sup> | K1 | O5  | C15              | -14.6(15)  | O4 <sup>1</sup> | K1 | O3 | O5 <sup>1</sup>  | 155.1(15)  |
| O1              | K1 | O5  | C14              | 146.4(13)  | O4              | K1 | O3 | O5 <sup>1</sup>  | 155.5(13)  |
| O1 <sup>1</sup> | K1 | O5  | C14              | 152.6(13)  | O4 <sup>1</sup> | K1 | O3 | C14 <sup>1</sup> | 73(3)      |
| O1              | K1 | O4  | C11 <sup>1</sup> | -97.3(18)  | O4              | K1 | O3 | C14 <sup>1</sup> | 73(3)      |
| O1 <sup>1</sup> | K1 | O4  | C11 <sup>1</sup> | -55.7(19)  | O4              | K1 | O2 | C9               | -18.9(18)  |
| O1              | K1 | O4  | C12              | 121.9(12)  | O4 <sup>1</sup> | K1 | O2 | C9               | -10.6(18)  |
| O1 <sup>1</sup> | K1 | O4  | C12              | 163.5(10)  | O4 <sup>1</sup> | K1 | O2 | C15 <sup>1</sup> | -39.1(13)  |
| O1              | K1 | O4  | C12 <sup>1</sup> | 172.2(17)  | O4              | K1 | O2 | C15 <sup>1</sup> | -47.4(13)  |
| O1 <sup>1</sup> | K1 | O4  | C12 <sup>1</sup> | -146.2(18) | O4              | K1 | O2 | C16 <sup>1</sup> | -132(2)    |
| O1              | K1 | O4  | C13              | -114.0(15) | O4 <sup>1</sup> | K1 | O2 | C16 <sup>1</sup> | -124(2)    |
| O1 <sup>1</sup> | K1 | O4  | C13              | -72.5(16)  | O4              | K1 | O2 | O6 <sup>1</sup>  | 156.4(12)  |
| O1              | K1 | O4  | O4 <sup>1</sup>  | 86.4(8)    | O4 <sup>1</sup> | K1 | O2 | O6 <sup>1</sup>  | 164.6(13)  |
| O1 <sup>1</sup> | K1 | O4  | O4 <sup>1</sup>  | 128.0(7)   | O4 <sup>1</sup> | K1 | O2 | C20              | -170.4(12) |
| O1 <sup>1</sup> | K1 | O6  | C19 <sup>1</sup> | 5.6(11)    | O4              | K1 | O2 | C20              | -178.7(11) |
| O1              | K1 | O6  | C19 <sup>1</sup> | -1.9(11)   | O4              | K1 | O5 | C9 <sup>1</sup>  | -143.9(15) |
| O1 <sup>1</sup> | K1 | O6  | O2 <sup>1</sup>  | 178.6(16)  | O4 <sup>1</sup> | K1 | O5 | C9 <sup>1</sup>  | -141.1(15) |
| O1              | K1 | O6  | O2 <sup>1</sup>  | 171.0(14)  | O4              | K1 | O5 | O3 <sup>1</sup>  | 18.7(11)   |
| O1 <sup>1</sup> | K1 | O6  | C16              | -146.4(17) | O4 <sup>1</sup> | K1 | O5 | O3 <sup>1</sup>  | 21.5(12)   |
| O1              | K1 | O6  | C16              | -154.0(16) | O4              | K1 | O5 | C10 <sup>1</sup> | -39(5)     |
| O1 <sup>1</sup> | K1 | O6  | C20 <sup>1</sup> | -88(3)     | O4 <sup>1</sup> | K1 | O5 | C10 <sup>1</sup> | -36(5)     |
| O1              | K1 | O6  | C20 <sup>1</sup> | -95(3)     | O4 <sup>1</sup> | K1 | O5 | C15              | -170.3(15) |
| O1 <sup>1</sup> | K1 | O6  | C22              | -27.8(11)  | O4              | K1 | O5 | C15              | -173.1(16) |
| O1              | K1 | O6  | C22              | -35.3(11)  | O4 <sup>1</sup> | K1 | O5 | C14              | -3.1(13)   |
| O1 <sup>1</sup> | O1 | C19 | C21 <sup>1</sup> | 34(3)      | O4              | K1 | O5 | C14              | -5.9(13)   |
| O1 <sup>1</sup> | O1 | C19 | O6 <sup>1</sup>  | -134.8(15) | O4 <sup>1</sup> | K1 | O4 | C11 <sup>1</sup> | 176.3(15)  |
| O1 <sup>1</sup> | O1 | C19 | C20              | -160.6(11) | O4 <sup>1</sup> | K1 | O4 | C12 <sup>1</sup> | 86(2)      |
| O1 <sup>1</sup> | O1 | C19 | C22 <sup>1</sup> | 159.7(17)  | O4 <sup>1</sup> | K1 | O4 | C12              | 35.5(11)   |
| O1 <sup>1</sup> | O1 | C21 | C19 <sup>1</sup> | -21.3(16)  | O4 <sup>1</sup> | K1 | O4 | C13              | 159.6(13)  |
| O1 <sup>1</sup> | O1 | C21 | C21 <sup>1</sup> | 179.991(4) | O4 <sup>1</sup> | K1 | O6 | C19 <sup>1</sup> | -144.6(11) |

|                  |     |     |                  |           |                  |     |     |                  |            |
|------------------|-----|-----|------------------|-----------|------------------|-----|-----|------------------|------------|
| O1 <sup>1</sup>  | O1  | C21 | C22              | 9.5(10)   | O4               | K1  | O6  | C19 <sup>1</sup> | -156.4(11) |
| O1               | C19 | C20 | O2               | 63(2)     | O4 <sup>1</sup>  | K1  | O6  | O2 <sup>1</sup>  | 28.3(15)   |
| O1               | C19 | C20 | C16 <sup>1</sup> | 88(7)     | O4               | K1  | O6  | O2 <sup>1</sup>  | 16.5(14)   |
| O1               | C19 | C20 | O6 <sup>1</sup>  | 50(2)     | O4               | K1  | O6  | C16              | 51.5(15)   |
| O1               | C19 | C20 | C22 <sup>1</sup> | -53(2)    | O4 <sup>1</sup>  | K1  | O6  | C16              | 63.3(16)   |
| O1               | C21 | C22 | O1 <sup>1</sup>  | -7.5(8)   | O4 <sup>1</sup>  | K1  | O6  | C20 <sup>1</sup> | 122(2)     |
| O1               | C21 | C22 | C19 <sup>1</sup> | -127(3)   | O4               | K1  | O6  | C20 <sup>1</sup> | 110(2)     |
| O1 <sup>1</sup>  | C21 | C22 | C19 <sup>1</sup> | -119(3)   | O4               | K1  | O6  | C22              | 170.1(11)  |
| O1               | C21 | C22 | O6               | -64(2)    | O4 <sup>1</sup>  | K1  | O6  | C22              | -178.0(11) |
| O1 <sup>1</sup>  | C21 | C22 | O6               | -57(2)    | O4 <sup>1</sup>  | C11 | C12 | C12 <sup>1</sup> | 15(2)      |
| O1 <sup>1</sup>  | C21 | C22 | C20 <sup>1</sup> | -85(4)    | O4 <sup>1</sup>  | C11 | C12 | C13 <sup>1</sup> | -156(8)    |
| O1               | C21 | C22 | C20 <sup>1</sup> | -93(4)    | O4 <sup>1</sup>  | C11 | C12 | O4               | 5.4(9)     |
| C9               | O2  | C20 | C19              | 146(2)    | O4 <sup>1</sup>  | C11 | O3  | K1               | 4(2)       |
| C9               | O2  | C20 | C16 <sup>1</sup> | -22(3)    | O4 <sup>1</sup>  | C11 | O3  | C10              | -146.0(18) |
| C9               | O2  | C20 | O6 <sup>1</sup>  | 164(3)    | O4 <sup>1</sup>  | C11 | O3  | C13 <sup>1</sup> | 75(5)      |
| C9               | O2  | C20 | C22 <sup>1</sup> | 180(3)    | O4 <sup>1</sup>  | C11 | O3  | O5 <sup>1</sup>  | -135(3)    |
| C9 <sup>1</sup>  | O5  | C15 | O2 <sup>1</sup>  | -65(2)    | O4 <sup>1</sup>  | C11 | O3  | C14 <sup>1</sup> | -141(3)    |
| C9 <sup>1</sup>  | O5  | C15 | C10 <sup>1</sup> | 75(3)     | O4 <sup>1</sup>  | C12 | O4  | K1               | -57.6(16)  |
| C9 <sup>1</sup>  | O5  | C15 | C16              | -83(3)    | O4 <sup>1</sup>  | C12 | O4  | C11 <sup>1</sup> | 171.1(15)  |
| C9 <sup>1</sup>  | O5  | C14 | C11 <sup>1</sup> | 164(3)    | O4 <sup>1</sup>  | C12 | O4  | C12 <sup>1</sup> | 179.996(6) |
| C9 <sup>1</sup>  | O5  | C14 | O3 <sup>1</sup>  | 167(2)    | O4 <sup>1</sup>  | C12 | O4  | C13              | 177.7(15)  |
| C9 <sup>1</sup>  | O5  | C14 | C10 <sup>1</sup> | -28(3)    | O4               | C13 | C14 | C11 <sup>1</sup> | 53(8)      |
| C9 <sup>1</sup>  | O5  | C14 | C13              | 172.6(18) | O4               | C13 | C14 | O3 <sup>1</sup>  | -60(2)     |
| C9 <sup>1</sup>  | C15 | C16 | O2 <sup>1</sup>  | -55(3)    | O4               | C13 | C14 | C10 <sup>1</sup> | -91(6)     |
| C9 <sup>1</sup>  | C15 | C16 | O6               | -63(3)    | O4               | C13 | C14 | O5               | -64(3)     |
| C9 <sup>1</sup>  | C15 | C16 | C20 <sup>1</sup> | -71(7)    | C15 <sup>1</sup> | C9  | O2  | K1               | -80(3)     |
| C9 <sup>1</sup>  | C16 | O6  | K1               | -62(2)    | C15 <sup>1</sup> | C9  | O2  | C16 <sup>1</sup> | 59(3)      |
| C9 <sup>1</sup>  | C16 | O6  | C19 <sup>1</sup> | 148.0(17) | C15 <sup>1</sup> | C9  | O2  | O6 <sup>1</sup>  | 117(8)     |
| C9 <sup>1</sup>  | C16 | O6  | O2 <sup>1</sup>  | -11.3(17) | C15 <sup>1</sup> | C9  | O2  | C20              | 75(3)      |
| C9 <sup>1</sup>  | C16 | O6  | C20 <sup>1</sup> | 163(3)    | C15 <sup>1</sup> | C9  | C10 | O3               | 79(3)      |
| C9 <sup>1</sup>  | C16 | O6  | C22              | 178.7(18) | C15 <sup>1</sup> | C9  | C10 | O5 <sup>1</sup>  | 69(3)      |
| C19              | O1  | C21 | O1 <sup>1</sup>  | 164.3(13) | C15 <sup>1</sup> | C9  | C10 | C14 <sup>1</sup> | 128(6)     |
| C19              | O1  | C21 | C19 <sup>1</sup> | 143(3)    | C15 <sup>1</sup> | O2  | C20 | C19              | 175.0(17)  |
| C19              | O1  | C21 | C21 <sup>1</sup> | -15.7(13) | C15 <sup>1</sup> | O2  | C20 | C16 <sup>1</sup> | 8(3)       |
| C19              | O1  | C21 | C22              | 173.8(18) | C15 <sup>1</sup> | O2  | C20 | O6 <sup>1</sup>  | -167(3)    |
| C19 <sup>1</sup> | C21 | C22 | O1 <sup>1</sup>  | 119(3)    | C15 <sup>1</sup> | O2  | C20 | C22 <sup>1</sup> | -151(2)    |
| C19 <sup>1</sup> | C21 | C22 | O6               | 62(2)     | C15              | O5  | C14 | C11 <sup>1</sup> | -167(3)    |
| C19 <sup>1</sup> | C21 | C22 | C20 <sup>1</sup> | 34(3)     | C15              | O5  | C14 | O3 <sup>1</sup>  | -163(3)    |
| C19 <sup>1</sup> | O6  | C22 | O1 <sup>1</sup>  | -71.0(16) | C15              | O5  | C14 | C10 <sup>1</sup> | 2(3)       |
| C19 <sup>1</sup> | O6  | C22 | C21              | -42.4(15) | C15              | O5  | C14 | C13              | -158(2)    |



|                                           |            |                                           |            |
|-------------------------------------------|------------|-------------------------------------------|------------|
| C19 <sup>1</sup> O6 C22 C20 <sup>1</sup>  | 111(3)     | C15 C16 O6 K1                             | -40(2)     |
| C12 C11 O3 K1                             | -27(3)     | C15 C16 O6 C19 <sup>1</sup>               | 170.3(18)  |
| C12 C11 O3 C10                            | -177(2)    | C15 C16 O6 O2 <sup>1</sup>                | 11(2)      |
| C12 C11 O3 C13 <sup>1</sup>               | 43(5)      | C15 C16 O6 C20 <sup>1</sup>               | -175(3)    |
| C12 C11 O3 O5 <sup>1</sup>                | -167(3)    | C15 C16 O6 C22                            | -159(2)    |
| C12 C11 O3 C14 <sup>1</sup>               | -172(3)    | C16 <sup>1</sup> C9 O2 K1                 | -139(2)    |
| C12 <sup>1</sup> C12 O4 K1                | 122.4(16)  | C16 <sup>1</sup> C9 O2 C15 <sup>1</sup>   | -59(3)     |
| C12 <sup>1</sup> C12 O4 C11 <sup>1</sup>  | -8.9(15)   | C16 <sup>1</sup> C9 O2 O6 <sup>1</sup>    | 58(8)      |
| C12 <sup>1</sup> C12 O4 C13               | -2.3(15)   | C16 <sup>1</sup> C9 O2 C20                | 16(2)      |
| C12 <sup>1</sup> C12 O4 O4 <sup>1</sup>   | 180.004(7) | C16 <sup>1</sup> C9 C10 O3                | 45(4)      |
| C12 <sup>1</sup> C13 O4 K1                | -117(2)    | C16 <sup>1</sup> C9 C10 O5 <sup>1</sup>   | 34(4)      |
| C12 <sup>1</sup> C13 O4 C11 <sup>1</sup>  | 163(6)     | C16 <sup>1</sup> C9 C10 C15 <sup>1</sup>  | -34(3)     |
| C12 <sup>1</sup> C13 O4 C12               | 2.0(12)    | C16 <sup>1</sup> C9 C10 C14 <sup>1</sup>  | 94(7)      |
| C12 <sup>1</sup> C13 O4 O4 <sup>1</sup>   | 6(4)       | C16 <sup>1</sup> O2 C20 C19               | 167(3)     |
| C12 <sup>1</sup> C13 C14 C11 <sup>1</sup> | 61(8)      | C16 <sup>1</sup> O2 C20 O6 <sup>1</sup>   | -174(4)    |
| C12 <sup>1</sup> C13 C14 O3 <sup>1</sup>  | -53(5)     | C16 <sup>1</sup> O2 C20 C22 <sup>1</sup>  | -158(4)    |
| C12 <sup>1</sup> C13 C14 C10 <sup>1</sup> | -84(7)     | C16 O6 C22 O1 <sup>1</sup>                | 164.7(16)  |
| C12 <sup>1</sup> C13 C14 O5               | -57(6)     | C16 O6 C22 C19 <sup>1</sup>               | -124(2)    |
| O3 <sup>1</sup> K1 O1 O1 <sup>1</sup>     | 22.1(5)    | C16 O6 C22 C21                            | -166.7(18) |
| O3 K1 O1 O1 <sup>1</sup>                  | 163.0(4)   | C16 O6 C22 C20 <sup>1</sup>               | -13(2)     |
| O3 K1 O1 C19                              | 8.7(15)    | C14 <sup>1</sup> C11 C12 C12 <sup>1</sup> | 61(8)      |
| O3 <sup>1</sup> K1 O1 C19                 | -132.2(13) | C14 <sup>1</sup> C11 C12 C13 <sup>1</sup> | -110(12)   |
| O3 K1 O1 C21                              | 151.8(14)  | C14 <sup>1</sup> C11 C12 O4               | 51(8)      |
| O3 K1 O1 C21 <sup>1</sup>                 | 93(6)      | C14 <sup>1</sup> C11 C12 O4 <sup>1</sup>  | 46(7)      |
| O3 <sup>1</sup> K1 O1 C21 <sup>1</sup>    | -48(7)     | C14 <sup>1</sup> C11 O3 K1                | 145(2)     |
| O3 <sup>1</sup> K1 O1 C21                 | 10.8(17)   | C14 <sup>1</sup> C11 O3 C10               | -5(2)      |
| O3 <sup>1</sup> K1 O1 C22 <sup>1</sup>    | -166.4(11) | C14 <sup>1</sup> C11 O3 C13 <sup>1</sup>  | -144(7)    |
| O3 K1 O1 C22 <sup>1</sup>                 | -25.4(13)  | C14 <sup>1</sup> C11 O3 O5 <sup>1</sup>   | 6(4)       |
| O3 <sup>1</sup> K1 O3 C11                 | -1.1(19)   | C14 <sup>1</sup> O3 C10 C9                | 150(4)     |
| O3 <sup>1</sup> K1 O3 C10                 | 141.6(17)  | C14 <sup>1</sup> O3 C10 O5 <sup>1</sup>   | 165(4)     |
| O3 <sup>1</sup> K1 O3 C13 <sup>1</sup>    | -15.2(15)  | C14 <sup>1</sup> O3 C10 C15 <sup>1</sup>  | 177(3)     |
| O3 <sup>1</sup> K1 O3 O5 <sup>1</sup>     | 156.7(10)  | C14 C13 O4 K1                             | 57(2)      |
| O3 <sup>1</sup> K1 O3 C14 <sup>1</sup>    | 74(3)      | C14 C13 O4 C11 <sup>1</sup>               | -23(4)     |
| O3 <sup>1</sup> K1 O2 C9                  | -47(2)     | C14 C13 O4 C12 <sup>1</sup>               | 174(3)     |
| O3 K1 O2 C9                               | 8.5(17)    | C14 C13 O4 C12                            | 176.2(18)  |
| O3 <sup>1</sup> K1 O2 C15 <sup>1</sup>    | -75.2(15)  | C14 C13 O4 O4 <sup>1</sup>                | -179.9(18) |
| O3 K1 O2 C15 <sup>1</sup>                 | -19.9(12)  | C14 O5 C15 C9 <sup>1</sup>                | -76(3)     |
| O3 <sup>1</sup> K1 O2 C16 <sup>1</sup>    | -160.2(18) | C14 O5 C15 O2 <sup>1</sup>                | -141.2(19) |
| O3 K1 O2 C16 <sup>1</sup>                 | -105(2)    | C14 O5 C15 C10 <sup>1</sup>               | -1(2)      |
| O3 K1 O2 O6 <sup>1</sup>                  | -176.2(14) | C14 O5 C15 C16                            | -159(2)    |

|                 |     |     |                  |            |                  |     |     |                  |             |
|-----------------|-----|-----|------------------|------------|------------------|-----|-----|------------------|-------------|
| O3 <sup>1</sup> | K1  | O2  | O6 <sup>1</sup>  | 128.6(13)  | C21              | O1  | C19 | C21 <sup>1</sup> | 15.0(13)    |
| O3 <sup>1</sup> | K1  | O2  | C20              | 153.5(11)  | C21              | O1  | C19 | O6 <sup>1</sup>  | -154.0(17)  |
| O3              | K1  | O2  | C20              | -151.3(13) | C21 <sup>1</sup> | O1  | C19 | O6 <sup>1</sup>  | -169(3)     |
| O3              | K1  | O5  | C9 <sup>1</sup>  | -136.8(14) | C21 <sup>1</sup> | O1  | C19 | C20              | 165(3)      |
| O3 <sup>1</sup> | K1  | O5  | C9 <sup>1</sup>  | -163(2)    | C21              | O1  | C19 | C20              | -179.7(18)  |
| O3              | K1  | O5  | O3 <sup>1</sup>  | 25.8(11)   | C21 <sup>1</sup> | O1  | C19 | C22 <sup>1</sup> | 126(3)      |
| O3              | K1  | O5  | C10 <sup>1</sup> | -32(5)     | C21              | O1  | C19 | C22 <sup>1</sup> | 141(2)      |
| O3 <sup>1</sup> | K1  | O5  | C10 <sup>1</sup> | -58(4)     | C21 <sup>1</sup> | O1  | C21 | O1 <sup>1</sup>  | -179.991(2) |
| O3 <sup>1</sup> | K1  | O5  | C15              | 168(2)     | C21 <sup>1</sup> | O1  | C21 | C19 <sup>1</sup> | 158.7(16)   |
| O3              | K1  | O5  | C15              | -166.0(14) | C21 <sup>1</sup> | O1  | C21 | C22              | -170.5(10)  |
| O3 <sup>1</sup> | K1  | O5  | C14              | -24.6(14)  | C21 <sup>1</sup> | C19 | C20 | O2               | 80(4)       |
| O3              | K1  | O5  | C14              | 1.1(15)    | C21 <sup>1</sup> | C19 | C20 | C16 <sup>1</sup> | 105(8)      |
| O3 <sup>1</sup> | K1  | O4  | C11 <sup>1</sup> | -2.6(15)   | C21 <sup>1</sup> | C19 | C20 | O6 <sup>1</sup>  | 66(4)       |
| O3              | K1  | O4  | C11 <sup>1</sup> | 175.5(17)  | C21 <sup>1</sup> | C19 | C20 | C22 <sup>1</sup> | -36(4)      |
| O3              | K1  | O4  | C12              | 34.7(10)   | C21 <sup>1</sup> | C21 | C22 | O1 <sup>1</sup>  | -19.4(18)   |
| O3              | K1  | O4  | C12 <sup>1</sup> | 85(2)      | C21 <sup>1</sup> | C21 | C22 | C19 <sup>1</sup> | -138(3)     |
| O3 <sup>1</sup> | K1  | O4  | C12 <sup>1</sup> | -93(2)     | C21 <sup>1</sup> | C21 | C22 | O6               | -76(3)      |
| O3 <sup>1</sup> | K1  | O4  | C12              | -143.4(13) | C21 <sup>1</sup> | C21 | C22 | C20 <sup>1</sup> | -105(4)     |
| O3              | K1  | O4  | C13              | 158.7(15)  | O6 <sup>1</sup>  | K1  | O1  | O1 <sup>1</sup>  | 161.0(5)    |
| O3 <sup>1</sup> | K1  | O4  | C13              | -19.3(13)  | O6               | K1  | O1  | O1 <sup>1</sup>  | 14.1(4)     |
| O3 <sup>1</sup> | K1  | O4  | O4 <sup>1</sup>  | -178.9(5)  | O6               | K1  | O1  | C19              | -140.2(15)  |
| O3              | K1  | O4  | O4 <sup>1</sup>  | -0.8(4)    | O6 <sup>1</sup>  | K1  | O1  | C19              | 6.7(13)     |
| O3 <sup>1</sup> | K1  | O6  | C19 <sup>1</sup> | -176.2(12) | O6 <sup>1</sup>  | K1  | O1  | C21              | 149.8(17)   |
| O3              | K1  | O6  | C19 <sup>1</sup> | -92.5(14)  | O6               | K1  | O1  | C21              | 2.9(14)     |
| O3              | K1  | O6  | O2 <sup>1</sup>  | 80.4(16)   | O6               | K1  | O1  | C21 <sup>1</sup> | -56(6)      |
| O3 <sup>1</sup> | K1  | O6  | O2 <sup>1</sup>  | -3.3(12)   | O6 <sup>1</sup>  | K1  | O1  | C21 <sup>1</sup> | 91(6)       |
| O3 <sup>1</sup> | K1  | O6  | C16              | 31.7(15)   | O6               | K1  | O1  | C22 <sup>1</sup> | -174.3(14)  |
| O3              | K1  | O6  | C16              | 115.4(15)  | O6 <sup>1</sup>  | K1  | O1  | C22 <sup>1</sup> | -27.4(11)   |
| O3              | K1  | O6  | C20 <sup>1</sup> | 174(2)     | O6               | K1  | O3  | C11              | -79(2)      |
| O3 <sup>1</sup> | K1  | O6  | C20 <sup>1</sup> | 90(3)      | O6 <sup>1</sup>  | K1  | O3  | C11              | -153.5(17)  |
| O3 <sup>1</sup> | K1  | O6  | C22              | 150.4(12)  | O6               | K1  | O3  | C10              | 63(2)       |
| O3              | K1  | O6  | C22              | -125.9(12) | O6 <sup>1</sup>  | K1  | O3  | C10              | -10.8(18)   |
| O3              | C11 | C12 | C12 <sup>1</sup> | 75(3)      | O6 <sup>1</sup>  | K1  | O3  | C13 <sup>1</sup> | -167.6(13)  |
| O3              | C11 | C12 | C13 <sup>1</sup> | -96(9)     | O6               | K1  | O3  | C13 <sup>1</sup> | -93.4(15)   |
| O3              | C11 | C12 | O4               | 66(3)      | O6               | K1  | O3  | O5 <sup>1</sup>  | 78.6(15)    |
| O3              | C11 | C12 | O4 <sup>1</sup>  | 60(2)      | O6 <sup>1</sup>  | K1  | O3  | O5 <sup>1</sup>  | 4.4(12)     |
| O3 <sup>1</sup> | C13 | O4  | K1               | 23.0(16)   | O6               | K1  | O3  | C14 <sup>1</sup> | -4(3)       |
| O3 <sup>1</sup> | C13 | O4  | C11 <sup>1</sup> | -57(5)     | O6 <sup>1</sup>  | K1  | O3  | C14 <sup>1</sup> | -78(3)      |
| O3 <sup>1</sup> | C13 | O4  | C12 <sup>1</sup> | 140(2)     | O6 <sup>1</sup>  | K1  | O2  | C9               | -175(2)     |
| O3 <sup>1</sup> | C13 | O4  | C12              | 142.4(17)  | O6               | K1  | O2  | C9               | -143.3(17)  |

|                 |     |     |                  |            |                  |     |     |                  |            |
|-----------------|-----|-----|------------------|------------|------------------|-----|-----|------------------|------------|
| O3 <sup>1</sup> | C13 | O4  | O4 <sup>1</sup>  | 146(2)     | O6 <sup>1</sup>  | K1  | O2  | C15 <sup>1</sup> | 156(2)     |
| O3 <sup>1</sup> | C13 | C14 | C11 <sup>1</sup> | 114(9)     | O6               | K1  | O2  | C15 <sup>1</sup> | -171.7(12) |
| O3 <sup>1</sup> | C13 | C14 | C10 <sup>1</sup> | -31(5)     | O6 <sup>1</sup>  | K1  | O2  | C16 <sup>1</sup> | 71(2)      |
| O3 <sup>1</sup> | C13 | C14 | O5               | -4.0(13)   | O6               | K1  | O2  | C16 <sup>1</sup> | 103(2)     |
| O3 <sup>1</sup> | O5  | C15 | C9 <sup>1</sup>  | -148(7)    | O6               | K1  | O2  | O6 <sup>1</sup>  | 32.0(12)   |
| O3 <sup>1</sup> | O5  | C15 | O2 <sup>1</sup>  | 147(7)     | O6               | K1  | O2  | C20              | 56.9(12)   |
| O3 <sup>1</sup> | O5  | C15 | C10 <sup>1</sup> | -73(8)     | O6 <sup>1</sup>  | K1  | O2  | C20              | 24.9(14)   |
| O3 <sup>1</sup> | O5  | C15 | C16              | 129(7)     | O6               | K1  | O5  | C9 <sup>1</sup>  | 12.3(14)   |
| O3 <sup>1</sup> | O5  | C14 | C11 <sup>1</sup> | -4(2)      | O6 <sup>1</sup>  | K1  | O5  | C9 <sup>1</sup>  | -33.0(17)  |
| O3 <sup>1</sup> | O5  | C14 | C10 <sup>1</sup> | 165(4)     | O6 <sup>1</sup>  | K1  | O5  | O3 <sup>1</sup>  | 129.6(12)  |
| O3 <sup>1</sup> | O5  | C14 | C13              | 5.4(17)    | O6               | K1  | O5  | O3 <sup>1</sup>  | 174.9(13)  |
| O2              | K1  | O1  | O1 <sup>1</sup>  | 160.5(3)   | O6               | K1  | O5  | C10 <sup>1</sup> | 117(5)     |
| O2 <sup>1</sup> | K1  | O1  | O1 <sup>1</sup>  | 17.1(3)    | O6 <sup>1</sup>  | K1  | O5  | C10 <sup>1</sup> | 72(5)      |
| O2 <sup>1</sup> | K1  | O1  | C19              | -137.2(14) | O6 <sup>1</sup>  | K1  | O5  | C15              | -62.2(17)  |
| O2              | K1  | O1  | C19              | 6.2(13)    | O6               | K1  | O5  | C15              | -16.9(14)  |
| O2              | K1  | O1  | C21 <sup>1</sup> | 90(6)      | O6               | K1  | O5  | C14              | 150.3(15)  |
| O2 <sup>1</sup> | K1  | O1  | C21 <sup>1</sup> | -53(6)     | O6 <sup>1</sup>  | K1  | O5  | C14              | 104.9(14)  |
| O2              | K1  | O1  | C21              | 149.2(16)  | O6 <sup>1</sup>  | K1  | O4  | C11 <sup>1</sup> | -148.1(15) |
| O2 <sup>1</sup> | K1  | O1  | C21              | 5.8(15)    | O6               | K1  | O4  | C11 <sup>1</sup> | -33.4(17)  |
| O2 <sup>1</sup> | K1  | O1  | C22 <sup>1</sup> | -171.4(13) | O6 <sup>1</sup>  | K1  | O4  | C12 <sup>1</sup> | 121(2)     |
| O2              | K1  | O1  | C22 <sup>1</sup> | -28.0(12)  | O6               | K1  | O4  | C12 <sup>1</sup> | -124(2)    |
| O2              | K1  | O3  | C11              | -152.2(18) | O6               | K1  | O4  | C12              | -174.2(11) |
| O2 <sup>1</sup> | K1  | O3  | C11              | -45.7(19)  | O6 <sup>1</sup>  | K1  | O4  | C12              | 71.1(12)   |
| O2              | K1  | O3  | C10              | -9.5(18)   | O6 <sup>1</sup>  | K1  | O4  | C13              | -164.9(13) |
| O2 <sup>1</sup> | K1  | O3  | C10              | 97.0(19)   | O6               | K1  | O4  | C13              | -50.1(15)  |
| O2 <sup>1</sup> | K1  | O3  | C13 <sup>1</sup> | -59.7(15)  | O6 <sup>1</sup>  | K1  | O4  | O4 <sup>1</sup>  | 35.6(4)    |
| O2              | K1  | O3  | C13 <sup>1</sup> | -166.3(14) | O6               | K1  | O4  | O4 <sup>1</sup>  | 150.3(4)   |
| O2 <sup>1</sup> | K1  | O3  | O5 <sup>1</sup>  | 112.2(12)  | O6 <sup>1</sup>  | K1  | O6  | C19 <sup>1</sup> | -22.6(14)  |
| O2              | K1  | O3  | O5 <sup>1</sup>  | 5.7(11)    | O6 <sup>1</sup>  | K1  | O6  | O2 <sup>1</sup>  | 150.3(11)  |
| O2 <sup>1</sup> | K1  | O3  | C14 <sup>1</sup> | 30(3)      | O6 <sup>1</sup>  | K1  | O6  | C16              | -174.7(13) |
| O2              | K1  | O3  | C14 <sup>1</sup> | -77(3)     | O6 <sup>1</sup>  | K1  | O6  | C20 <sup>1</sup> | -116(2)    |
| O2 <sup>1</sup> | K1  | O2  | C9               | -128.5(16) | O6 <sup>1</sup>  | K1  | O6  | C22              | -56.1(13)  |
| O2 <sup>1</sup> | K1  | O2  | C15 <sup>1</sup> | -156.9(10) | O6 <sup>1</sup>  | C19 | C20 | O2               | 13.3(14)   |
| O2 <sup>1</sup> | K1  | O2  | C16 <sup>1</sup> | 118.1(19)  | O6 <sup>1</sup>  | C19 | C20 | C16 <sup>1</sup> | 39(6)      |
| O2 <sup>1</sup> | K1  | O2  | O6 <sup>1</sup>  | 46.8(16)   | O6 <sup>1</sup>  | C19 | C20 | C22 <sup>1</sup> | -103(3)    |
| O2 <sup>1</sup> | K1  | O2  | C20              | 71.8(13)   | O6 <sup>1</sup>  | O2  | C20 | C19              | -18.3(19)  |
| O2              | K1  | O5  | C9 <sup>1</sup>  | -66.8(16)  | O6 <sup>1</sup>  | O2  | C20 | C16 <sup>1</sup> | 174(4)     |
| O2 <sup>1</sup> | K1  | O5  | C9 <sup>1</sup>  | 9.7(14)    | O6 <sup>1</sup>  | O2  | C20 | C22 <sup>1</sup> | 16(2)      |
| O2              | K1  | O5  | O3 <sup>1</sup>  | 95.8(13)   | C20 <sup>1</sup> | C16 | O6  | K1               | 135(3)     |
| O2 <sup>1</sup> | K1  | O5  | O3 <sup>1</sup>  | 172.4(15)  | C20 <sup>1</sup> | C16 | O6  | C19 <sup>1</sup> | -15(3)     |

|                 |     |     |                  |            |                  |     |     |                  |            |
|-----------------|-----|-----|------------------|------------|------------------|-----|-----|------------------|------------|
| O2 <sup>1</sup> | K1  | O5  | C10 <sup>1</sup> | 115(5)     | C20 <sup>1</sup> | C16 | O6  | O2 <sup>1</sup>  | -174(4)    |
| O2              | K1  | O5  | C10 <sup>1</sup> | 38(5)      | C20 <sup>1</sup> | C16 | O6  | C22              | 16(3)      |
| O2              | K1  | O5  | C15              | -96.0(16)  | C20 <sup>1</sup> | O6  | C22 | O1 <sup>1</sup>  | 178(2)     |
| O2 <sup>1</sup> | K1  | O5  | C15              | -19.5(14)  | C20 <sup>1</sup> | O6  | C22 | C19 <sup>1</sup> | -111(3)    |
| O2 <sup>1</sup> | K1  | O5  | C14              | 147.7(16)  | C20 <sup>1</sup> | O6  | C22 | C21              | -153(3)    |
| O2              | K1  | O5  | C14              | 71.2(15)   | C22 <sup>1</sup> | O1  | C19 | C21 <sup>1</sup> | -126(3)    |
| O2 <sup>1</sup> | K1  | O4  | C11 <sup>1</sup> | -28.0(16)  | C22 <sup>1</sup> | O1  | C19 | O6 <sup>1</sup>  | 65.5(15)   |
| O2              | K1  | O4  | C11 <sup>1</sup> | -157.6(16) | C22 <sup>1</sup> | O1  | C19 | C20              | 39.7(15)   |
| O2              | K1  | O4  | C12              | 61.6(11)   | C22 <sup>1</sup> | O1  | C21 | O1 <sup>1</sup>  | -166.4(15) |
| O2              | K1  | O4  | C12 <sup>1</sup> | 112(2)     | C22 <sup>1</sup> | O1  | C21 | C19 <sup>1</sup> | 172(2)     |
| O2 <sup>1</sup> | K1  | O4  | C12 <sup>1</sup> | -119(2)    | C22 <sup>1</sup> | O1  | C21 | C21 <sup>1</sup> | 13.6(15)   |
| O2 <sup>1</sup> | K1  | O4  | C12              | -168.8(11) | C22 <sup>1</sup> | O1  | C21 | C22              | -157(2)    |
| O2              | K1  | O4  | C13              | -174.4(14) | C22 <sup>1</sup> | C19 | C20 | O2               | 116(3)     |
| O2 <sup>1</sup> | K1  | O4  | C13              | -44.8(14)  | C22 <sup>1</sup> | C19 | C20 | C16 <sup>1</sup> | 141(8)     |
| O2              | K1  | O4  | O4 <sup>1</sup>  | 26.1(3)    | C22 <sup>1</sup> | C19 | C20 | O6 <sup>1</sup>  | 103(3)     |
| O2 <sup>1</sup> | K1  | O4  | O4 <sup>1</sup>  | 155.7(3)   | C6 <sup>1</sup>  | C5  | C6  | C7               | -73.0(9)   |
| O2 <sup>1</sup> | K1  | O6  | C19 <sup>1</sup> | -173(2)    | C6 <sup>1</sup>  | C5  | C6  | C8               | 164.3(16)  |
| O2              | K1  | O6  | C19 <sup>1</sup> | -32.6(13)  | C6 <sup>1</sup>  | C5  | C6  | C9A              | 45.7(16)   |
| O2              | K1  | O6  | O2 <sup>1</sup>  | 140.3(14)  | C6 <sup>1</sup>  | C5  | C6  | C9A <sup>1</sup> | 101(2)     |
| O2 <sup>1</sup> | K1  | O6  | C16              | 35.0(16)   | C6 <sup>1</sup>  | C6  | C8  | C9A <sup>1</sup> | 15(5)      |
| O2              | K1  | O6  | C16              | 175.3(14)  | C6 <sup>1</sup>  | C6  | C9A | C8 <sup>1</sup>  | -4.8(16)   |
| O2 <sup>1</sup> | K1  | O6  | C20 <sup>1</sup> | 94(3)      | C6 <sup>1</sup>  | C6  | C9A | C9A <sup>1</sup> | 179.998(2) |
| O2              | K1  | O6  | C20 <sup>1</sup> | -126(2)    | C7               | C6  | C8  | C9A <sup>1</sup> | 125(2)     |
| O2              | K1  | O6  | C22              | -66.1(12)  | C7               | C6  | C9A | C6 <sup>1</sup>  | 56.2(17)   |
| O2 <sup>1</sup> | K1  | O6  | C22              | 154(2)     | C7               | C6  | C9A | C8 <sup>1</sup>  | 51(2)      |
| O2              | C9  | C10 | O3               | 0(4)       | C7               | C6  | C9A | C9A <sup>1</sup> | -123.8(17) |
| O2              | C9  | C10 | O5 <sup>1</sup>  | -11(3)     | C8               | C6  | C7  | C6 <sup>1</sup>  | -161.4(15) |
| O2              | C9  | C10 | C15 <sup>1</sup> | -79(3)     | C8               | C6  | C9A | C6 <sup>1</sup>  | 175.6(15)  |
| O2              | C9  | C10 | C14 <sup>1</sup> | 49(7)      | C8               | C6  | C9A | C8 <sup>1</sup>  | 171(3)     |
| O2 <sup>1</sup> | C15 | C16 | C9 <sup>1</sup>  | 55(3)      | C8               | C6  | C9A | C9A <sup>1</sup> | -4.4(15)   |
| O2 <sup>1</sup> | C15 | C16 | O6               | -8.2(15)   | C9A <sup>1</sup> | C6  | C7  | C6 <sup>1</sup>  | -100(3)    |
| O2 <sup>1</sup> | C15 | C16 | C20 <sup>1</sup> | -16(6)     | C9A              | C6  | C7  | C6 <sup>1</sup>  | -42.1(16)  |
| O2 <sup>1</sup> | C16 | O6  | K1               | -51(2)     | C9A              | C6  | C8  | C9A <sup>1</sup> | 4.2(15)    |
| O2 <sup>1</sup> | C16 | O6  | C19 <sup>1</sup> | 159(2)     | C9A <sup>1</sup> | C6  | C9A | C6 <sup>1</sup>  | 180.002(3) |
| O2 <sup>1</sup> | C16 | O6  | C20 <sup>1</sup> | 174(4)     | C9A <sup>1</sup> | C6  | C9A | C8 <sup>1</sup>  | 175.2(16)  |
| O2 <sup>1</sup> | C16 | O6  | C22              | -170(2)    |                  |     |     |                  |            |

1+X,1/2-Y,+Z

**Table 7 Hydrogen Atom Coordinates ( $\text{\AA}\times 10^4$ ) and Isotropic Displacement Parameters ( $\text{\AA}^2\times 10^3$ ) for exp\_26.**

| Atom | x     | y    | z    | U(eq) |
|------|-------|------|------|-------|
| H3A  | 1388  | 1509 | 8615 | 64    |
| H3B  | 2299  | 1592 | 8663 | 64    |
| H3C  | 1902  | 984  | 7779 | 64    |
| H1A  | 1047  | 1919 | 6526 | 41    |
| H1B  | 1045  | 3083 | 6530 | 41    |
| H1C  | 641   | 2497 | 7424 | 41    |
| H11A | -1189 | 1130 | 3816 | 41    |
| H11B | -915  | 602  | 4814 | 41    |
| H9A  | 651   | -732 | 2638 | 43    |
| H9B  | 73    | -239 | 1885 | 43    |
| H19A | 2431  | 1131 | 908  | 28    |
| H19B | 1566  | 1343 | 615  | 28    |
| H12A | -349  | 2121 | 5384 | 33    |
| H12B | -1248 | 2220 | 5255 | 33    |
| H10A | -133  | -497 | 3862 | 57    |
| H10B | -709  | 7    | 3109 | 57    |
| H13A | -401  | 3874 | 5166 | 34    |
| H13B | -1278 | 3865 | 4855 | 34    |
| H15A | 739   | 5702 | 3441 | 32    |
| H15B | 216   | 5587 | 2487 | 32    |
| H16A | 1750  | 5164 | 2668 | 44    |
| H16B | 1284  | 5436 | 1686 | 44    |
| H14A | -683  | 5186 | 4005 | 39    |
| H14B | -917  | 4403 | 3186 | 39    |
| H21A | 1836  | 2944 | 537  | 42    |
| H21B | 2693  | 2815 | 901  | 42    |
| H20A | 2022  | 393  | 2461 | 36    |
| H20B | 1677  | -169 | 1527 | 36    |
| H22A | 2296  | 4423 | 1327 | 38    |
| H22B | 2398  | 3840 | 2352 | 38    |
| H7A  | 3420  | 2062 | 3496 | 67    |
| H7B  | 3672  | 3175 | 3606 | 67    |
| H7C  | 4238  | 2406 | 3094 | 67    |
| H8A  | 4100  | 732  | 4537 | 88    |
| H8B  | 4908  | 1134 | 4160 | 88    |
| H8C  | 4728  | 1067 | 5340 | 88    |
| H9AA | 5298  | 2871 | 4369 | 84    |

|      |      |      |      |    |
|------|------|------|------|----|
| H9AB | 4731 | 3646 | 4869 | 84 |
| H9AC | 5112 | 2814 | 5547 | 84 |
